# Supplementary material for: The impact of “Child Care” intervention in rural Primary Health Care Program on prevalence of diarrhea among children less than 36 months of age in rural western China
Source: BMC Pediatr. 2018 Jul 11;18:228. doi: 10.1186/s12887-018-1172-1 (PMC6042409; doi:10.1186/s12887-018-1172-1)
Supplement: Supplementary file 1 — Data of the study. (CSV 2181 kb) [file 12887_2018_1172_MOESM1_ESM.csv]

bc	p_id	year	ses_u	familysize	childsize	drinkingwa	mage_u	medu_u	ethnicity	cage_u	cgender_u	breastfeed	anemia_u	stunting_u	underweigh	wasting_u	vitamina_u	delivery_u	naturedeli	diarrhea_u	v_id	cold	childage	canemia	vita3	v	c	int	whz	haz	waz
3445001311	4	0	3	0	0	0	28.3	0	1	4	1	0	0	0	0	0	0	1	1	0	34450013	0	2	3	3	34450013	344500	0
4052004410	10	1	1	1	1	1	30.3	0	1	6	1	0	0				1	1	1	0	40520044	0	3	2	1	40520044	405200	0
6446002201	8	0	2	0	1	1	24.8	0	1	5	1	0	0	0	0	0	0	1	1	1	64460022	0	3	3	3	64460022	644600	0
7515001416	6	1	2	1	1	1	21.8	0	1	2	0	1	0	0	0	0	0	1	1	1	75150014	0	1	3	3	75150014	751500	0
7516004101	6	0	2	0	0	1	30	1	1	4	0	0	0	0	0	1	1	1	1	0	75160041	1	2	1	1	75160041	751600	0
7563001203	6	1	3	1	1	1	30.1	0	1	5	1	0	0	0	0	0	1	1	1	0	75630012	0	3	2	1	75630012	756300	0
7563002414	6	1	3	1	0	1	30.6	0	1	4	1	0	0	0	0	0	1	1	1	0	75630024	0	2	2	1	75630024	756300	0
8105005405	7	1	3	1	1	1	24.2	0	0	2	0	1	0	0	0	0	0	1	1	0	81050054	1	1	3	3	81050054	810500	0
8107002207	7	0	2	1	1	1	17.8	0	1	3	0	1	0	0	0	1	1	0	1	0	81070022	0	2	2	1	81070022	810700	0
8107004203	7	0	1	1	1	1	22.8	0	1	3	0	1	0	0	0	0	1	0	1	1	81070042	0	2	2	1	81070042	810700	0
8107004404	7	1	2	1	0	1	30.5	0	1	3	0	1	0	0	0	0	1	1	1	0	81070044	0	2	2	1	81070044	810700	0
8107004410	7	1	3	1	1	1	22.4	0	1	5	1	0	0	0	0	0	1	1	1	0	81070044	0	3	2	1	81070044	810700	0
8113003404	7	0	3	1	0	0	29.9	0	0	3	0	0	0	1	0	0	1	0	1	0	81130034	1	2	2	1	81130034	811300	0
8113005201	7	0	2	1	1	1	25.4	0	0	5	0	0	1	0	0	0	0	1	1	0	81130052	1	3	1	3	81130052	811300	0
8447001207	9	1	3	0	1	0	22.8	0	0	4	1	1	1	1	1	0	0	1	1	1	84470012	1	2	1	3	84470012	844700	0
8447001316	9	1	3	1	0	0	29.9	0	0	4	0	0	0	0	0	0	1	1	1	1	84470013	1	2	2	1	84470013	844700	0
8447004114	9	0	3	0	0	0	34.9	0	0	5	1	0	0	0	0	0	1	0	0	0	84470041	0	3	1	1	84470041	844700	0	-.07	-5.47	-3.33
8447004305	9	0	3	1	0	1	28	0	0	2	1	1	1	0	0	0	0	1	1	0	84470043	0	1	1		84470043	844700	0	-1.55	-1.04	-1.63
8447004308	9	0	3	1	1	1	20	0	0	1	0	1	1	1	0	0	0	1	1	0	84470043	0	1	1	2	84470043	844700	0	.54	-3.45	-1.62
8447004407	9	1	3	1	1	0	20.8	0	0	6	1	0	1	1	0	0	1	0	1	0	84470044	0	3	1	1	84470044	844700	0	-.21	-2.2	-1.45
8447005202	9	1	3	0	0	0	31.2	0	0	3	0	1	0	0	0	0	1	1	0	1	84470052	1	2	3	1	84470052	844700	0	-2.2	-.02	-1.45
117001206	5	0	2	0	0	1	30.8	1	1	5	0	1	0	0	0	0	0	0	1	0	1170012	0	3	2	3	1170012	11700	1	-2.1	.32	-1.42
117004214	5	0	3	1	1	1	23.9	0	1	2	0	1	0	0	0	0	0	1	1	0	1170042	0	1	2	3	1170042	11700	1	-2.07	.02	-1.34
150001313	5	0	3	0	1	1	25.7	0	1	3	1	1	0	0	0	0	0	1	1	0	1500013	1	2	3	3	1500013	15000	1	-.24	-1.66	-1.05
150002112	5	1	2	0	1	1	24.5	0	1	6	0	0	0	0	0	0	1	1	1	0	1500021	0	3	3	1	1500021	15000	1	-.31	-1.28	-.81
150002213	5	0	3	0	1	1	26.5	0	1	6	0	0	0	0	0	0	0	1	1	0	1500022	0	3	2	3	1500022	15000	1	-.33	-.92	-.7
150004401	5	0	3	0	1	0	24.2	0	1	6	1	0	0	0	0	0	0	1	0	0	1500044	1	3	3	3	1500044	15000	1	.13	-1.26	-.57
150005410	5	0	3	0	1	1	21.6	0	1	3	1	1	0	0	0	0	0	1	1	0	1500054	0	2	2	3	1500054	15000	1	-.67	.05	-.5
150005412	5	1	3	0	1	1	25.2	0	1	3	1	1	0	0	0	0	0	1	1	0	1500054	1	2	2	3	1500054	15000	1	.28	-1.21	-.41
151001301	5	0	3	0	0	0	31.9	0	1	2	0	1	0				0	0	1	0	1510013	0	1	1	3	1510013	15100	1	-.41	.92	.2
3441003104	4	1	3	1	1	1	21.6	0	1	3	1	0	0	0	0	0	1	1	1	0	34410031	0	2	2	1	34410031	344100	1	-.17	1.01	.41
5339003315	2	0	3	1	1	1	23.1	0	0	2	1	1	0	1	0	0	0	0	1	0	53390033	0	1	2	3	53390033	533900	1	-.51	1.61	.54
5339003418	2	0	1	1	1	1	24.9	0	0	4	0	0	0	1	1	0	0	0	1	0	53390034	0	2	2	3	53390034	533900	1
5425004215	2	1	2	1	1	1	26	0	0	4	1	1	0	0	0	0	1	1	1	0	54250042	1	2	2	1	54250042	542500	1
3416001101	4	1	3	0	0	1	27.1	0	1	6	1	0	1	0	0	0	1	1	1	0	34160011	0	3	1	1	34160011	341600	0
3416001101	4	0	1	0	0	0	26.5	0	1	4	1	0	0	0	0	0	1	0	1	0	34160011	0	2	2	1	34160011	341600	0
3416001102	4	1	3	0	0	1	24.4	0	1	5	1	0	0	0	0	0	1	1	1	0	34160011	0	3	3	1	34160011	341600	0
3416001102	4	0	1	0	1	0	45	0	1	2	1	1	0	0	0	0	0	1	0	0	34160011	1	1	2		34160011	341600	0
3416001103	4	1	3	1	1	1	20.8	0	1	1	0	0	1	0	0	0	0	1	1	0	34160011	0	1	1	3	34160011	341600	0
3416001103	4	0	1	1	1	1	24.5	0	1	2	1	0	0	0	1	1	1	1	1	0	34160011	0	1	2	1	34160011	341600	0
3416001104	4	0	3	0	1	1	24.7	0	1	6	1	1	0				1	1	1	0	34160011	0	3	2	1	34160011	341600	0
3416001105	4	1	3	0	0	1		0	1	2	1	0	0	0	0	0	0	1	1	0	34160011	1	1	3	3	34160011	341600	0
3416001105	4	0	1	0	1	1	23.8	0	1	3	1	1	0	0	1	0	1	1	1	0	34160011	1	2	2	1	34160011	341600	0
3416001106	4	1	3	0	1	1	27.8	0	1	6	0	0	0	0	0	0	1	1	1	0	34160011	0	3	3	1	34160011	341600	0
3416001106	4	0	2	0	1	1	27.4	0	1	3	1	1	0	0	0	0	1	1	0	0	34160011	0	2	2	1	34160011	341600	0
3416001107	4	1	2	1	1	1		0	1	6	1	0	0	0	0	1	0	1	1	0	34160011	1	3	2	3	34160011	341600	0
3416001107	4	0	1	1	0	0	31.8	0	1	5	1	0	0	0	0	0	0	1	0	0	34160011	1	3	2	3	34160011	341600	0
3416001108	4	1	3	1	0	1	24.2	0	1	2	1	1	1	0	0	0	1	1	1	0	34160011	0	1	1	1	34160011	341600	0
3416001108	4	0	3	0	0	1	31.3	0	1	3	1	1	0	0	1	1	1	1	0	1	34160011	1	2	2	1	34160011	341600	0	-1.05	-3.21	-2.38
3416001109	4	0	2	0	1	1	24.9	0	1	2	0	1	0	0	0	0	0	1	1	0	34160011	0	1	2	3	34160011	341600	0	-1.12	-1.46	-1.52
3416001110	4	1	3	0	0	1	29.2	0	1	4	1	0	0	0	0	1	0	1	1	0	34160011	0	2	3	3	34160011	341600	0	-1.01	-.83	-1.14
3416001110	4	0	2	0	1	1	28.3	0	1	3	1	1	0	0	1	0	1	1	0	0	34160011	1	2	2	1	34160011	341600	0	-.21	-1.43	-.92
3416001111	4	0	1	0	1	1	27.7	0	1	5	1	0	0	1	1	0	0	1	1	0	34160011	0	3	2	2	34160011	341600	0	-1.24	.73	-.6
3416001112	4	0	2	1	0	1	45.6	0	1	6	0	1	0	0	1	1	1	1	1	0	34160011	0	3	2	1	34160011	341600	0	-.03	-1.18	-.56
3416001114	4	1	1	1	0	1		0	1	5	1	0	0	0	0	0	1	1	1	0	34160011	0	3	2	1	34160011	341600	0	-.03	-1.13	-.54
3416001114	4	0	1	1	0	1	35.4	0	1	6	1	0	0	1	1	0	0	0	1	0	34160011	1	3	2	3	34160011	341600	0	-.02	-.21	-.08
3416001115	4	0	2	0	0	1	30.4	0	1	4	0	1	0	0	0	0	0	1	1	0	34160011	0	2	2	3	34160011	341600	0	.99	-1.58	.05
3416001116	4	1	3	0	0	1	31.8	0	1	6	0	0	0	0	1	1	1	1	1	0	34160011	0	3	3	1	34160011	341600	0	-.4	.68	.08
3416001117	4	0	3	0	1	1	24.8	0	0	6	1	0	0	0	0	0	0	1	1	0	34160011	0	3	2	3	34160011	341600	0			.17
3416001201	4	1	3	1	0	1	36.9	0	1	5	0	0	0	0	0	0	1	1	1	0	34160012	0	3	2	1	34160012	341600	0	-.05	.88	.34
3416001201	4	0	1	1	1	1	25.5	0	1	2	1	1	0	0	0	0	1	1	0	1	34160012	1	1	3	1	34160012	341600	0	1.02	-.75	.42
3416001202	4	1	1	1	1	1	28.9	0	1	4	1	0	0	0	0	0	1	1	1	0	34160012	0	2	2	1	34160012	341600	0	.69	.07	.51
3416001202	4	0	2	0	1	0	25.8	0	1	3	1	1	0	0	1	1	0	1	0	0	34160012	0	2	3	3	34160012	341600	0	-.49	2.38	.93
3416001203	4	1	1	1	1	1	26.9	0	1	3	1	0	0	0	0	0	1	1	1	0	34160012	1	2	2	1	34160012	341600	0	1.11	.44	1.03
3416001203	4	0	2	0	1	0	23.2	0	1	6	0	0	1	0	0	0	1	1	1	1	34160012	1	3	1	1	34160012	341600	0
3416001204	4	1	1	0	0	1	26.9	0	1	1	1	0	0		0		1	1	0	1	34160012	1	1	3	1	34160012	341600	0
3416001204	4	0	2	1	1	1	27.7	0	1	3	1	0	0	0	0	0	0	1	1	1	34160012	1	2	3	3	34160012	341600	0
3416001205	4	1	3	1	1	1	22	0	1	2	1	1	0	0	0	0	1	1	1	0	34160012	0	1	3	1	34160012	341600	0
3416001205	4	0	3	1	1	1	24	0	1	1	1	1	0	0	0	0	1	1	1	0	34160012	0	1	3	1	34160012	341600	0
3416001206	4	1	2	1	1	1	31.1	0	1	3	1	0	0	0	0	0	1	1	1	0	34160012	0	2	2	1	34160012	341600	0
3416001206	4	0	2	1	1	1	25.6	0	1	4	1	0	0	1	0	0	1	1	1	0	34160012	1	2	3	1	34160012	341600	0
3416001207	4	1	3	1	1	1	27.3	0	1	5	0	0	0	1	1	0	1	1	1	0	34160012	0	3	3	1	34160012	341600	0
3416001207	4	0	3	0	1	1	24.7	0	1	4	1	0	0	0	0	0	0	1	1	0	34160012	0	2	3	3	34160012	341600	0
3416001208	4	1	3	1	1	1	26.2	0	1	3	0	0	0	0	0	0	1	1	1	0	34160012	0	2	2	1	34160012	341600	0
3416001208	4	0	2	1	1	1	22.8	0	1	1	0	1	0	0	0	0	0	1	1	1	34160012	1	1	3		34160012	341600	0
3416001209	4	1	3	1	0	1	28.7	0	1	5	0	0	0	0	0	0	1	1	1	0	34160012	0	3	3	1	34160012	341600	0
3416001209	4	0	1	1	0	1	29.6	0	1	3	1	0	0	0	1	0	1	1	1	0	34160012	0	2	3	1	34160012	341600	0
3416001210	4	1	3	1	0	1	32.9	0	1	5	1	0	0	0	0	0	1	1	1	0	34160012	0	3	3	1	34160012	341600	0
3416001210	4	0	2	1	1	1	21.7	0	1	2	1	0	0	0	0	0	1	1	1	1	34160012	0	1	3	1	34160012	341600	0
3416001211	4	0	1	1	1	1	23.8	0	1	2	0	0	1	0	0	0	1	1	1	0	34160012	1	1	1	1	34160012	341600	0
3416001212	4	1	2	1	1	1	23.9	0	1	2	0	0	0	0	0	0	1	1	1	0	34160012	0	1	2	1	34160012	341600	0
3416001212	4	0	1	1	1	0	25.1	0	1	1	1	1	0	0	0	0	0	1	1	1	34160012	0	1	3	3	34160012	341600	0
3416001213	4	1	1	1	1	1	24.9	0	1	3	1	0	0	0	0	0	1	1	1	0	34160012	0	2	2	1	34160012	341600	0
3416001213	4	0	2	1	1	0	24.5	0	1	2	1	0	0	0	0	0	1	1	1	1	34160012	0	1	3	1	34160012	341600	0
3416001214	4	1	1	1	0	1	21.9	0	1	5	1	0	0	1	1	0	1	1	1	0	34160012	1	3	2	1	34160012	341600	0
3416001214	4	0	2	0	1	1	23.8	0	1	3	1	0	0	0	0	0	1	1	1	0	34160012	1	2	3	1	34160012	341600	0
3416001215	4	1	2	1	0	1	28	0	0	2	1	1	1	0	0	0	0	1	1	0	34160012	0	1	1	3	34160012	341600	0
3416001215	4	0	1	1	1	1	25.7	0	1	1	1	1	0	0	0	0	0	1	1	0	34160012	0	1	3	3	34160012	341600	0
3416001216	4	1	1	1	1	1	23.9	1	1	3	1	0	0	0	0	0	0	1	1	1	34160012	0	2	2	3	34160012	341600	0
3416001216	4	0	2	0	1	0	27	0	1	6	1	0	0	0	0	0	1	1	1	0	34160012	1	3	3	1	34160012	341600	0
3416001301	4	1	2	0	0	1	35.2	0	0	4	1	0	0	0	0	0	1	0	0	0	34160013	0	2	3	1	34160013	341600	0
3416001301	4	0	3	1	1	1	24.8	0	1	1	0	1	0	0	0	0	0	1	1	0	34160013	0	1	3	3	34160013	341600	0
3416001302	4	1	2	0	0	1	27.4	0	1	3	1	0	0	0	0	0	1	1	0	0	34160013	1	2	3	1	34160013	341600	0
3416001302	4	0	2	0	1	1	25.6	0	1	6	1	0	0	0	0	0	1	1	1	0	34160013	1	3	3	1	34160013	341600	0
3416001303	4	1	1	0	1	1	37	0	1	3	0	1	0		1	0	0	1	0	0	34160013	0	2	3	3	34160013	341600	0
3416001303	4	0	2	0	1	1	29.2	0	1	4	0	0	0	0	0	0	0	0	1	0	34160013	0	2	2	3	34160013	341600	0
3416001304	4	1	2	0	0	1		0	1	3	1	0	1	0	0	0	1	0	0	0	34160013	0	2	1	1	34160013	341600	0	-1.36	-2.88	-2.73
3416001304	4	0	2	0	0	1	27.2	0	1	4	1	0	0	0	0	1	1	1	1	1	34160013	0	2	3	1	34160013	341600	0	-.63	-3.39	-2.52
3416001305	4	1	3	0	1	1	26.6	0	1	2	0	0	0	0	0	0	0	1	1	0	34160013	1	1	3	3	34160013	341600	0	-2.85	-.78	-2.45
3416001305	4	0	3	0	0	1	31.4	0	1	4	1	0	0	0	0	0	1	1	1	0	34160013	0	2	3	1	34160013	341600	0	-.05	-2.29	-1.63
3416001306	4	1	3	1	0	1	32.1	0	1	5	1	0	0	0	0	0	1	1	1	0	34160013	0	3	3	1	34160013	341600	0	-1.18	-1.34	-1.49
3416001306	4	0	1	0	1	0	32.1	0	1	5	0	0	0	0	0	0	1	0	1	0	34160013	0	3	3	1	34160013	341600	0	-1.36	-.97	-1.43
3416001307	4	0	3	1	1	0	26.2	0	1	6	1	0	0				1	1	1	0	34160013	0	3	2	1	34160013	341600	0	.53	-2.88	-1.05
3416001308	4	1	2	1	1	1	23.4	0	1	1	0	1	0	0	0	0	0	1	0	0	34160013	1	1	3	3	34160013	341600	0	.75	-2.68	-.75
3416001309	4	1	1	1	1	1	21.7	0	1	1	0	1	1	0	0	0	0	1	1	0	34160013	0	1	1	3	34160013	341600	0	-.18	-1.18	-.75
3416001309	4	0	2	1	0	1	29	0	1	1	1	1	0	0	0	0	1	1	1	0	34160013	0	1	2	1	34160013	341600	0	.51	-1.52	-.45
3416001310	4	1	3	0	0	0	31.8	0	1	4	0	0	0	1	0	0	1	1	1	0	34160013	0	2	3	1	34160013	341600	0	-.38	-.44	-.45
3416001310	4	0	3	0	0	1	30.8	0	1	4	1	0	0	0	1	1	1	1	1	0	34160013	1	2	3	1	34160013	341600	0	-.43	-.09	-.37
3416001311	4	1	1	0	0	1	31.3	0	1	4	1	0	0	0	0	0	1	1	1	0	34160013	1	2	3	1	34160013	341600	0	1.35	-1.46	.07
3416001311	4	0	3	0	1	0	24.8	0	1	6	1	0	0	1	1	0	0	1	1	1	34160013	0	3	3	3	34160013	341600	0	-1.3	4.68	1.22
3416001312	4	1	3	1	1	1	27.9	0	1	3	1	0	0	0	0	0	0	0	1	0	34160013	0	2	2	3	34160013	341600	0	.56	2.3	1.57
3416001312	4	0	2	0	1	1	24.2	0	1	1	1	1	0	0	0	0	0	0	1	0	34160013	1	1	3	3	34160013	341600	0	3.71	-.46	2.59
3416001313	4	1	1	1	1	1	22.9	0	1	3	0	0	0	0	0	0	1	0	1	0	34160013	0	2	2	1	34160013	341600	0	-2.4	-1.85	-2.72
3416001313	4	0	1	0	0	0	30.8	0	1	5	0	0	0	0	0	0	1	1	0	0	34160013	0	3	3	1	34160013	341600	0	-1.42	-2	-2.04
3416001314	4	1	3	1	0	1	26.9	0	1	6	1	0	0	0	0	0	1	1	1	0	34160013	0	3	2	1	34160013	341600	0	-1.27	-1.84	-1.86
3416001314	4	0	2	1	1	1	22.1	0	1	2	1	1	0	0	0	0	1	1	1	0	34160013	1	1	3	1	34160013	341600	0	-1.14	-1.91	-1.83
3416001315	4	1	2	1	1	1	22.3	0	1	5	1	0	0	0	0	0	1	1	0	0	34160013	0	3	2	1	34160013	341600	0	.14	-3.24	-1.82
3416001315	4	0	2	1	0	1	27.8	0	1	3	1	0	0	0	0	1	1	1	1	0	34160013	1	2	2	1	34160013	341600	0	-1.35	-.86	-1.38
3416001316	4	1	1	1	0	1	22.8	0	1	2	1	0	0	0	0	0	1	1	1	0	34160013	1	1	2	1	34160013	341600	0	-1.55	-.23	-1.28
3416001316	4	0	2	0	0	1	35.2	0	1	4	1	0	1	0	0	0	0	1	1	0	34160013	0	2	1	3	34160013	341600	0	-.41	-1.56	-1.11
3416001317	4	0	3	0	1	1	23.5	0	1	2	0	0	1	1	0	0	0	1	1	0	34160013	1	1	1	3	34160013	341600	0	.25	-2.19	-.94
3416001318	4	0	2	1	1	1	24.6	0	1	1	1	1	0	0	0	0	0	1	1	0	34160013	0	1	3	3	34160013	341600	0	-.53	-.81	-.79
3416001319	4	0	2	0	1	1	26	0	1	6	1	0	0	0	0	0	1	1	1	0	34160013	0	3	2	1	34160013	341600	0	.28	-.7	-.15
3416001320	4	0	3	1	1	1	29.8	0	1	4	1	0	0	0	0	0	1	1	1	0	34160013	0	2	2	1	34160013	341600	0	-.05	.24	.11
3416001321	4	0	3	1	1	1	24.9	0	1	3	0	1	0	0	0	0	0	1	1	1	34160013	0	2	3	3	34160013	341600	0	1.03	-1.34	.17
3416001322	4	0	1	0	0	1	28.5	0	1	2	1	1	0	0	0	0	0	1	1	0	34160013	0	1	3	3	34160013	341600	0	.38	.02	.31
3416001401	4	1	2	0	0	0	33.9	0	1	3	1	0	0				1	1	1	0	34160014	0	2	2	1	34160014	341600	0	.56	.25	.49
3416001401	4	0	1	1	0	1	29.3	0	1	1	1	1	0	0	0	0	0	1	1	0	34160014	0	1	2	3	34160014	341600	0	.68	1.23	1.02
3416001402	4	1	1	1	0	1	41.1	0	1	3	1	0	1	0	0	0	1	1	1	0	34160014	0	2	1	1	34160014	341600	0
3416001402	4	0	1	1	1	1	24.8	0	1	2	1	1	0	0	0	0	0	1	0	0	34160014	0	1	2	3	34160014	341600	0
3416001403	4	1	1	0	1	1	26.5	0	1	6	0	0	0	0	0	0	1	1	1	1	34160014	0	3	2	1	34160014	341600	0
3416001403	4	0	1	0	1	1	22.9	0	1	4	1	1	0	0	0	0	1	1	1	0	34160014	0	2	2	1	34160014	341600	0
3416001404	4	1	2	1	0	0	29	0	1	4	1	0	0	0	0	0	1	1	1	0	34160014	1	2	2	1	34160014	341600	0
3416001404	4	0	1	1	1	1	27.4	0	1	5	1	0	0	1	1	0	1	1	1	0	34160014	0	3	2	1	34160014	341600	0
3416001405	4	1	1	0	0	0	28.6	0	1	3	1	1	1	0	1	1	1	1	0	1	34160014	1	2	1	1	34160014	341600	0
3416001405	4	0	1	0	0	1	42.4	0	1	3	1	1	0	1	1	0	0	1	0	0	34160014	1	2	2	3	34160014	341600	0
3416001406	4	1	3	0	0	1	32.9	0	1	4	1	0	1	0	0	0	1	1	1	0	34160014	0	2	1	1	34160014	341600	0
3416001406	4	0	2	1	1	1	24.6	0	1	1	1	1	0	0	0	0	1	0	1	0	34160014	1	1	2	1	34160014	341600	0
3416001407	4	1	1	1	1	1	27.1	0	1	3	1	0	0	0	0	0	1	1	1	0	34160014	0	2	2	1	34160014	341600	0
3416001407	4	0	2	0	0	0	31.2	0	0	1	1	1	0	0	0	0	0	1	1	0	34160014	0	1	2	3	34160014	341600	0
3416001408	4	1	1	0	0	1	35.8	0	1	3	1	1	0	0	0	0	0	1	1	1	34160014	1	2	2	3	34160014	341600	0
3416001408	4	0	3	1	1	0	22.8	0	1	6	1	0	0	0	0	0	0	1	1	0	34160014	0	3	2	3	34160014	341600	0
3416001409	4	0	3	0	1	1	24.7	0	1	2	0	1	0	0	0	0	0	1	1	0	34160014	0	1	2	3	34160014	341600	0
3416001410	4	0	2	1	0	1	29.3	0	1	3	1	1	0	0	0	0	0	1	1	0	34160014	0	2	2	3	34160014	341600	0
3416002101	4	1	2	0	0	1	32.3	0	1	4	0	0	0	1	1	0	1	1	1	0	34160021	0	2	3	1	34160021	341600	0
3416002101	4	0	2	0	1	0	26.2	0	1	3	1	0	0	1	1	0	1	1	1	0	34160021	0	2	2	1	34160021	341600	0
3416002102	4	1	1	0	0	1	31.8	0	1	1	1	1	0	0	0	0	0	1	1	0	34160021	0	1	3	3	34160021	341600	0
3416002102	4	0	1	1	1	1	23.8	0	1	6	0	0	0	0	0	0	0	1	1	0	34160021	1	3	2	3	34160021	341600	0
3416002103	4	1	2	0	0	1	27.3	0	1	1	1	0	1	0	0	0	1	1	1	1	34160021	1	1	1	1	34160021	341600	0
3416002104	4	1	1	0	0	1	28.4	0	1	3	1	1	1		1	0	0	1	0	0	34160021	0	2	1	3	34160021	341600	0
3416002104	4	0	2	0	1	1	26.1	0	1	1	0	1	0	0	0	0	1	0	1	0	34160021	0	1	2	1	34160021	341600	0
3416002105	4	1	2	1	0	1	36.5	0	1	1	0	1	1	0	0	0	0	1	0	0	34160021	0	1	1	3	34160021	341600	0
3416002106	4	1	3	1	1	1	22.1	0	1	2	1	1	0	0	0	0	0	1	1	0	34160021	1	1	3	3	34160021	341600	0
3416002106	4	0	1	0	1	1	25.9	0	1	6	1	0	0	0	0	0	0	1	1	0	34160021	0	3	2	3	34160021	341600	0
3416002107	4	1	3	1	0	1	32.4	0	1	2	1	1	1	0	0	0	1	1	1	0	34160021	0	1	1	1	34160021	341600	0
3416002108	4	1	1	0	0	1	35.3	0	1	2	1	1	1	0	0	0	0	1	0	0	34160021	0	1	1	3	34160021	341600	0
3416002108	4	0	2	1	1	1	28	0	1	4	0	0	0	1	0	0	0	0	1	0	34160021	0	2	2	3	34160021	341600	0
3416002109	4	1	1	1	0	1	32.2	0	1	4	1	0	0	1	1	0	1	1	1	0	34160021	0	2	3	1	34160021	341600	0
3416002109	4	0	2	0	0	0	29.8	0	1	4	1	0	0	0	0	0	0	1	1	0	34160021	0	2	2	3	34160021	341600	0	-3.36	-.23	-2.31
3416002110	4	1	2	1	0	1	36.5	0	1	1	0	1	1	0	0	0	0	1	0	0	34160021	0	1	1	3	34160021	341600	0	-.47	-2.77	-1.76
3416002110	4	0	2	1	1	1	23.3	0	1	4	0	0	0	1	1	0	0	1	1	0	34160021	1	2	2	3	34160021	341600	0	-.36	-2.2	-1.46
3416002111	4	1	3	0	0	1	35.2	0	1	2	0	1	0	0	0	0	0	1	1	0	34160021	1	1	3	3	34160021	341600	0	-.69	-.72	-.84
3416002111	4	0	2	0	1	0	27.3	0	1	4	1	0	0	0	0	0	0	1	1	0	34160021	0	2	2	3	34160021	341600	0	.21	-2.03	-.78
3416002112	4	1	1	1	1	1	28.8	0	1	2	1	0	0	0	0	0	1	1	0	0	34160021	0	1	3	1	34160021	341600	0	.5	-1.97	-.58
3416002112	4	0	2	0	1	1	25.3	0	1	3	0	1	0	1	0	0	0	1	1	0	34160021	0	2	2	3	34160021	341600	0	-.93	.12	-.54
3416002113	4	1	1	0	0	1	30.4	0	1	4	1	0	1	0	0	0	1	1	0	0	34160021	1	2	1	1	34160021	341600	0	-.77	.04	-.5
3416002113	4	0	3	0	1	1	27.6	0	1	2	1	1	0	1	0	0	0	1	1	1	34160021	0	1	2	3	34160021	341600	0	.62	-1.68	-.46
3416002114	4	1	1	1	0	1	32.6	0	1	5	1	0	0				1	0	0	0	34160021	0	3	2	1	34160021	341600	0	.82	-1.51	-.41
3416002114	4	0	2	0	1	1	25.8	0	1	4	0	0	0	1	1	0	1	1	1	1	34160021	0	2	2	1	34160021	341600	0	.31	-.19	.16
3416002115	4	1	2	0	0	1	28.8	0	1	1	0	1	1	0	0	0	0	1	1	0	34160021	0	1	1	3	34160021	341600	0	.93	-.99	.23
3416002115	4	0	1	1	1	1	22.8	0	1	2	0	1	0	1	1	0	0	0	1	0	34160021	0	1	2	3	34160021	341600	0	.06	.78	.44
3416002116	4	1	2	0	0	1	29.3	0	1	4	0	0	0	0	0	0	1	0	1	0	34160021	0	2	2	1	34160021	341600	0	.39	.48	.56
3416002116	4	0	2	1	0	1	28.1	0	1	3	1	0	0	0	0	0	1	0	1	0	34160021	0	2	2	1	34160021	341600	0	1.83	-1.82	.57
3416002117	4	1	1	1	0	1	42.9	0	1	4	0	0	0	1	1	0	1	1	0	0	34160021	0	2	2	1	34160021	341600	0	1.47	-.07	1.08
3416002117	4	0	2	0	1	1	24.5	0	1	3	1	0	0	1	1	0	0	1	1	0	34160021	0	2	2	3	34160021	341600	0
3416002118	4	0	1	0	0	0	30.9	0	1	3	1	1	0	1	1	0	0	1	1	1	34160021	1	2	2	3	34160021	341600	0
3416002119	4	1	2	1	0	1	31.9	0	1	4	1	0	0	1	1	0	1	1	1	0	34160021	0	2	2	1	34160021	341600	0
3416002201	4	1	2	1	0	1	25.9	0	1	3	1	0	0	0	0	0	1	1	1	0	34160022	0	2	2	1	34160022	341600	0
3416002201	4	0	2	0	1	1	25.5	0	1	1	1	1	0	0	0	0	0	1	1	1	34160022	0	1	3		34160022	341600	0	-.6	-2.37	-1.73
3416002202	4	1	1	1	0	1	30.7	0	1	3	1	0	0	0	0	0	1	1	0	0	34160022	0	2	2	1	34160022	341600	0	-.17	-2.93	-1.52
3416002202	4	0	1	0	0	1	29.6	0	1	4	1	0	1	0	0	0	1	1	1	0	34160022	0	2	1	1	34160022	341600	0	-1.02	-.62	-.99
3416002203	4	1	2	1	0	1	32.6	0	1	6	1	0	0	0	0	0	1	1	0	0	34160022	0	3	2	1	34160022	341600	0	.59	-2.63	-.81
3416002203	4	0	2	1	1	0	23.1	0	1	1	0	1	0	0	0	0	0	1	1	0	34160022	1	1	3	3	34160022	341600	0	-1.18	.27	-.63
3416002204	4	1	1	1	0	1	34.5	0	1	3	1	0	1	0	0	0	1	0	1	0	34160022	1	2	1	1	34160022	341600	0	-.44	-.62	-.62
3416002205	4	1	1	0	0	1	35.4	0	1	2	0	1	1	1	0	0	0	0	0	0	34160022	0	1	1	3	34160022	341600	0	.66	-1.57	-.21
3416002205	4	0	3	0	1	0	26.1	0	1	6	1	0	0	0	0	0	0	1	1	0	34160022	0	3	3	3	34160022	341600	0	-.46	.73	.1
3416002206	4	1	1	0	0	1	32.7	0	1	1	0	1	1	0	0	0	0	0	1	1	34160022	0	1	1	3	34160022	341600	0	-.51	.94	.15
3416002206	4	0	2	0	1	1	24.7	0	1	3	1	0	1	0	0	0	0	1	1	0	34160022	1	2	1	3	34160022	341600	0	.41	-.22	.23
3416002207	4	1	1	0	1	1	23.9	0	1	3	1	0	0	0	0	0	1	1	1	0	34160022	0	2	2	1	34160022	341600	0	2.56	-2.57	.65
3416002207	4	0	2	1	0	1	29.7	0	1	6	1	0	0	1	0	0	1	1	1	0	34160022	1	3	3	1	34160022	341600	0	1.3	1.3	1.59
3416002208	4	0	3	1	1	1	25.9	0	1	2	1	1	1	0	0	0	0	1	1	0	34160022	1	1	1	2	34160022	341600	0
3416002209	4	1	2	1	1	1	23.9	0	1	4	1	0	0	0	0	0	1	1	1	0	34160022	0	2	2	1	34160022	341600	0
3416002209	4	0	3	0	1	1	29	0	1	3	1	0	0	0	1	1	1	1	1	0	34160022	0	2	3	1	34160022	341600	0
3416002210	4	1	1	1	1	1	27.9	0	1	5	1	0	0	0	0	0	1	0	0	0	34160022	0	3	2	1	34160022	341600	0
3416002211	4	0	1	1	1	0	23.2	0	1	4	1	0	1	0	1	1	1	1	1	0	34160022	0	2	1	1	34160022	341600	0
3416002212	4	1	2	1	0	1	30	0	1	1	1	1	1	0	0	0	0	1	0	0	34160022	0	1	1	3	34160022	341600	0
3416002213	4	1	1	0	0	1	30.7	0	1	4	1	0	1	0	0	0	1	0	1	0	34160022	1	2	1	1	34160022	341600	0
3416002213	4	0	3	1	1	1	24.7	0	1	3	1	0	0	0	0	0	0	1	0	0	34160022	0	2	3	3	34160022	341600	0
3416002214	4	1	2	1	0	1	31.3	0	1	2	0	1	1	0	0	0	0	1	1	0	34160022	1	1	1	3	34160022	341600	0
3416002214	4	0	3	1	0	1	27.3	0	1	2	0	1	1	0	0	0	0	0	1	1	34160022	0	1	1	3	34160022	341600	0
3416002215	4	1	1	1	0	1	25.5	0	1	2	0	1	0	0	0	0	1	1	1	0	34160022	0	1	3	1	34160022	341600	0
3416002215	4	0	1	0	0	0	27.6	0	1	4	1	0	1	1	0	0	0	1	1	0	34160022	0	2	1	3	34160022	341600	0
3416002216	4	0	2	0	0	1	28.8	0	1	2	1	1	1	0	0	0	0	1	1	0	34160022	0	1	1	3	34160022	341600	0
3416002217	4	0	2	1	1	1	23.7	0	1	2	1	1	1	0	0	0	0	1	1	0	34160022	0	1	1	3	34160022	341600	0
3416002218	4	0	2	1	1	1	22.9	0	1	1	0	1	1	0	0	0	0	1	1	1	34160022	0	1	1	3	34160022	341600	0
3416002219	4	0	2	1	0	1	29.7	0	1	3	0	1	0	0	0	0	0	1	1	0	34160022	0	2	3	3	34160022	341600	0
3416002301	4	1	1	0	0	1	32.4	0	1	2	1	1	1	1	0	0	0	1	1	0	34160023	0	1	1	3	34160023	341600	0
3416002301	4	0	3	0	0	1	29.3	0	1	1	1	1	1	0	0	0	0	1	1	1	34160023	0	1	1	3	34160023	341600	0
3416002302	4	1	1	1	0	1	27.3	0	1	5	1	0	0	0	0	0	0	1	1	0	34160023	1	3	2	2	34160023	341600	0
3416002302	4	0	3	1	1	1	26.5	0	1	2	1	0	1	0	0	0	1	1	1	0	34160023	0	1	1	1	34160023	341600	0
3416002303	4	1	2	0	0	1	36.9	0	1	4	1	0	0	1	0	0	1	1	1	0	34160023	0	2	2	1	34160023	341600	0
3416002303	4	0	1	1	1	1	24.5	0	1	1	0	0	0	0	0	0	1	0	1	1	34160023	1	1	3	1	34160023	341600	0
3416002304	4	1	1	1	0	1	25.9	0	1	5	1	0	0	0	0	0	1	1	1	0	34160023	0	3	2	1	34160023	341600	0
3416002304	4	0	3	0	0	1	27.7	0	1	5	1	0	0	0	0	0	0	0	1	0	34160023	0	3	3	3	34160023	341600	0
3416002305	4	1	2	1	0	1	27.9	0	1	2	1	0	1	0	0	0	0	1	0	0	34160023	1	1	1	3	34160023	341600	0
3416002305	4	0	2	1	1	1	23.8	0	1	2	0	1	0	0	0	0	0	1	1	1	34160023	0	1	3	3	34160023	341600	0
3416002306	4	1	1	0	0	1	28.5	0	1	2	1	1	1	1	0	0	0	1	1	0	34160023	0	1	1	3	34160023	341600	0
3416002306	4	0	3	1	1	0	24.1	0	1	6	0	0	0	0	0	0	0	1	1	0	34160023	0	3	3	3	34160023	341600	0
3416002307	4	0	3	0	0	0	27.7	0	1	4	1	0	0	0	0	0	0	1	1	0	34160023	0	2	3	3	34160023	341600	0
3416002308	4	1	1	0	1	1	26.7	0	1	4	1	0	0	1	1	1	1	1	0	0	34160023	1	2	2	1	34160023	341600	0
3416002308	4	0	3	0	1	0	25.5	0	1	5	1	0	0	1	1	0	1	1	1	0	34160023	1	3	3	1	34160023	341600	0
3416002309	4	1	1	1	0	1	31.8	0	1	1	1	1	0	0	0	0	0	1	1	0	34160023	1	1	3	3	34160023	341600	0
3416002309	4	0	3	1	0	1	25.2	0	1	2	0	1	0	1	0	0	0	1	1	1	34160023	0	1	3	3	34160023	341600	0	-3.55	-2.68	-3.9
3416002310	4	1	2	1	0	1	29.9	0	1	2	1	0	0	0	0	0	0	1	1	0	34160023	0	1	2	3	34160023	341600	0	-.94	-3	-2.2
3416002310	4	0	1	0	1	1	26.5	0	1	3	0	0	1	0	0	0	0	1	1	0	34160023	0	2	1	3	34160023	341600	0	-3.58	.76	-2.04
3416002311	4	1	1	0	0	1	31.9	0	1	4	1	0	0	1	1	0	1	1	1	0	34160023	0	2	2	1	34160023	341600	0	1.23	-3.56	-1.28
3416002311	4	0	2	0	0	1	29.7	0	1	2	1	1	0	0	0	1	0	1	1	0	34160023	1	1	3	3	34160023	341600	0	-1.08	-.9	-1.19
3416002312	4	1	2	0	0	1	33.5	0	1	2	1	1	1	1	1	0	0	1	1	0	34160023	0	1	1	3	34160023	341600	0	-1.43	-.16	-1.14
3416002312	4	0	2	1	1	1	23.8	0	1	2	1	1	1	0	0	0	0	1	0	1	34160023	0	1	1	3	34160023	341600	0	-1.1	-.69	-1.09
3416002313	4	1	1	1	0	1	27.3	0	1	3	1	1	1	0	0	0	1	1	1	0	34160023	0	2	1	1	34160023	341600	0	.21	-1.72	-1
3416002313	4	0	3	0	1	1	24.8	0	1	6	0	0	0	0	0	0	0	1	1	0	34160023	0	3	3	3	34160023	341600	0	.75	-2.75	-.74
3416002314	4	1	2	1	0	1	31.8	0	1	3	1	1	1	1	0	0	1	1	1	0	34160023	0	2	1	1	34160023	341600	0	-4.44	5.22	-.63
3416002314	4	0	3	1	1	1	26.8	0	1	5	1	0	1	1	1	1	1	0	1	0	34160023	0	3	1	1	34160023	341600	0	-1.08	1.22	-.1
3416002315	4	0	2	1	1	1	22.6	0	1	2	0	1	0	0	0	0	0	1	1	0	34160023	0	1	3	3	34160023	341600	0	-.55	.57	-.09
3416002316	4	0	2	0	1	1	24.7	0	1	2	0	0	0	0	0	0	0	1	1	0	34160023	0	1	3		34160023	341600	0	.8	-1.01	.07
3416002317	4	0	2	1	1	1	24.3	0	1	1	0	1	0	0	0	0	0	1	1	0	34160023	0	1	3	3	34160023	341600	0	-.51	1.08	.23
3416002318	4	0	1	0	1	0	25.9	0	1	5	0	0	0	1	0	0	1	1	1	0	34160023	0	3	3	1	34160023	341600	0	.41	.68	.63
3416002401	4	1	1	0	0	1	30.8	0	1	2	1	1	0	1	0	0	1	1	1	0	34160024	0	1	2	1	34160024	341600	0	-1.76	3.01	1.06
3416002401	4	0	2	0	0	1	28.9	0	1	1	1	1	0	0	0	0	0	0	1	0	34160024	1	1	2		34160024	341600	0	-1.07	-1.5	-1.6
3416002402	4	1	2	1	0	1	26.9	0	1	4	1	0	0	0	0	0	1	1	1	0	34160024	1	2	2	1	34160024	341600	0	2.26	-5.2	-1.25
3416002402	4	0	2	0	1	1	25.6	0	1	3	1	1	0	0	0	0	0	1	1	0	34160024	0	2	2		34160024	341600	0	-1.54	-.1	-1.15
3416002403	4	1	3	0	1	1	27.3	0	1	3	1	0	0	0	0	0	1	1	0	0	34160024	0	2	2	1	34160024	341600	0	-.67	-.92	-.95
3416002403	4	0	1	0	1	1	23.1	0	1	3	0	0	0	0	0	0	0	0	1	0	34160024	0	2	2	3	34160024	341600	0	3	-5.5	-.76
3416002404	4	1	2	1	1	1	23.9	0	1	3	1	0	0	0	0	0	0	1	0	0	34160024	1	2	2	2	34160024	341600	0	1.32	-3.17	-.55
3416002404	4	0	2	1	1	1	24.2	0	1	2	0	1	0	0	0	0	0	1	1	0	34160024	0	1	2	3	34160024	341600	0	-3.67	4.6	-.48
3416002405	4	1	1	1	0	1	30.9	0	1	4	1	0	0	0	0	0	1	1	1	0	34160024	0	2	2	1	34160024	341600	0	-.94	.51	-.35
3416002405	4	0	2	0	1	1	30.6	0	1	4	1	0	0	0	0	0	0	1	1	0	34160024	0	2	2	3	34160024	341600	0	.78	-1.52	-.3
3416002406	4	1	2	1	1	1	25.9	0	1	2	0	0	0	0	0	0	0	1	0	0	34160024	1	1	2	3	34160024	341600	0	-1.4	1.6	-.08
3416002406	4	0	2	0	0	1	27.7	0	1	2	1	1	0	0	0	0	0	0	1	0	34160024	0	1	2	3	34160024	341600	0	.8	.34	.73
3416002407	4	1	3	1	1	1	27.1	0	1	6	1	0	0	0	0	0	1	1	1	0	34160024	0	3	2	1	34160024	341600	0	-2.53	5.92	1.02
3416002407	4	0	1	0	1	1	24.8	0	1	4	1	0	0	1	1	0	0	1	1	0	34160024	0	2	2	3	34160024	341600	0	.36	1.9	1.13
3416002408	4	0	3	1	1	1	23.1	0	1	2	0	1	0	0	0	0	0	1	1	0	34160024	0	1	2	3	34160024	341600	0		-4.79	1.71
3416002409	4	1	1	1	0	1	30.9	0	1	3	1	0	0	0	0	0	1	1	1	0	34160024	0	2	2	1	34160024	341600	0			2.43
3416002409	4	0	1	0	0	0	29.6	0	1	4	1	0	0	0	0	1	0	1	1	0	34160024	1	2	2	3	34160024	341600	0
3416002410	4	1	2	1	1	1	23.9	0	1	2	0	1	0	0	0	0	0	1	0	0	34160024	0	1	2	3	34160024	341600	0
3416002410	4	0	2	0	1	1	25.2	0	1	4	1	0	0	0	0	0	0	1	1	0	34160024	0	2	2	3	34160024	341600	0
3416002411	4	1	2	0	0	1	35.3	1	1	1	1	1	1	0	0	0	0	1	1	0	34160024	1	1	1	3	34160024	341600	0
3416002411	4	0	2	1	1	1	25.8	0	1	1	1	1	0	0	0	0	0	1	0	0	34160024	0	1	2	3	34160024	341600	0
3416002412	4	1	1	1	0	1	31.6	0	1	4	1	1	1	1	1	0	1	1	1	0	34160024	1	2	1	1	34160024	341600	0
3416002412	4	0	2	1	0	1	26.9	0	1	1	1	1	0	0	0	0	0	1	1	1	34160024	1	1	2		34160024	341600	0
3416002413	4	1	1	1	0	1	28.9	0	1	3	1	0	0	0	1	1	1	1	0	0	34160024	1	2	2	1	34160024	341600	0
3416002413	4	0	3	0	1	1	25.6	0	1	5	0	0	0	1	1	0	1	1	1	0	34160024	1	3	2	1	34160024	341600	0
3416002414	4	1	2	1	1	1	24.9	0	1	3	0	0	0	0	0	0	0	1	0	0	34160024	1	2	2	3	34160024	341600	0
3416002414	4	0	3	1	1	1	25.4	0	1	6	0	0	0	0	0	0	0	0	1	0	34160024	0	3	2	3	34160024	341600	0
3416002415	4	1	1	1	0	1	29.8	0	1	3	1	0	0	0	0	0	0	1	0	0	34160024	0	2	2	3	34160024	341600	0
3416002415	4	0	2	1	0	1	31.1	0	1	3	1	0	0	1	1	0	0	1	1	0	34160024	0	2	2		34160024	341600	0
3416002416	4	1	2	1	0	1	27.9	0	1	2	1	0	0	1	1	1	0	1	1	0	34160024	1	1	2	3	34160024	341600	0
3416003101	4	0	1	0	1	1	25	0	1	3	1	0	0	0	0	0	0	1	1	0	34160031	0	2	3	3	34160031	341600	0
3416003102	4	1	1	1	0	1	33	0	1	2	1	1	0	0	0	0	0	1	1	0	34160031	0	1	2	3	34160031	341600	0
3416003102	4	0	2	0	1	1	26.2	0	1	4	1	0	0	0	0	0	0	1	1	0	34160031	0	2	3	3	34160031	341600	0
3416003103	4	1	1	1	0	1	30.6	0	1	4	1	0	0	0	1	1	1	0	1	0	34160031	1	2	2	1	34160031	341600	0
3416003103	4	0	3	0	1	1	26	0	1	2	1	1	0	0	0	0	0	1	1	1	34160031	0	1	3		34160031	341600	0
3416003104	4	1	1	1	0	1	29	0	1	1	0	1	0	0	0	0	0	0	1	0	34160031	0	1	2	3	34160031	341600	0
3416003104	4	0	3	0	1	1	27.9	0	1	2	0	1	0	0	0	0	0	1	1	0	34160031	0	1	3	3	34160031	341600	0
3416003105	4	1	2	1	1	1	28.3	1	1	3	1	0	1	0	0	0	1	1	0	0	34160031	1	2	1	1	34160031	341600	0
3416003105	4	0	2	0	0	1	28.3	0	1	1	0	1	0	0	0	0	0	0	1	0	34160031	0	1	3	3	34160031	341600	0
3416003106	4	1	2	1	0	1	27.5	0	1	5	1	0	0	0	0	0	1	1	0	0	34160031	0	3	3	1	34160031	341600	0
3416003106	4	0	1	0	1	1	24.8	0	1	2	1	1	1	0	0	0	0	1	1	0	34160031	1	1	1	3	34160031	341600	0
3416003107	4	1	2	1	1	1	25.8	0	1	2	0	1	1	0	0	0	0	1	0	1	34160031	0	1	1	3	34160031	341600	0
3416003107	4	0	2	1	1	1	25.8	0	1	1	1	1	0	1	0	0	0	1	1	1	34160031	1	1	3	3	34160031	341600	0
3416003108	4	1	1	0	0	1	30.8	0	1	5	1	0	1	0	0	0	1	1	1	0	34160031	0	3	1	1	34160031	341600	0
3416003108	4	0	2	1	0	0	26	0	1	4	1	0	0	0	0	0	0	1	1	0	34160031	0	2	3	3	34160031	341600	0
3416003109	4	1	2	0	1	1	26.6	0	1	3	0	0	0	0	0	1	1	1	0	0	34160031	0	2	3	1	34160031	341600	0
3416003110	4	1	2	1	0	1	26	0	1	4	1	0	0	0	1	1	1	1	1	0	34160031	0	2	2	1	34160031	341600	0
3416003110	4	0	2	0	1	1	24.8	0	1	2	1	1	0	0	0	0	0	1	1	0	34160031	0	1	3	3	34160031	341600	0
3416003111	4	1	1	0	0	1	35.8	0	1	4	1	0	1	0	0	0	0	1	0	0	34160031	0	2	1	3	34160031	341600	0	-.04	-3.47	-2.86
3416003111	4	0	1	0	0	1	32	0	1	4	1	0	0	1	1	0	0	0	1	0	34160031	1	2	3	3	34160031	341600	0	-1.65	-2.03	-2.36
3416003112	4	1	1	1	1	0	22.8	0	1	2	0	0	0	0	0	0	1	1	0	0	34160031	1	1	2	1	34160031	341600	0	-1.31	-.53	-1.13
3416003112	4	0	1	1	1	1	24	0	1	3	0	0	0	0	0	0	1	1	1	0	34160031	0	2	3	1	34160031	341600	0	.06	-2.3	-1.05
3416003113	4	1	1	0	0	1	33.8	0	1	2	1	0	1	0	0	0	0	1	0	0	34160031	0	1	1	3	34160031	341600	0	-.18	-1.1	-.87
3416003113	4	0	1	0	0	1	27.8	0	1	3	0	0	0	0	0	0	0	1	1	0	34160031	1	2	3	3	34160031	341600	0	.5	-2.62	-.86
3416003114	4	1	2	1	1	1	26.4	0	1	1	0	0	0	0	0	0	0	1	0	0	34160031	0	1	2	3	34160031	341600	0	.07	-.48	-.17
3416003114	4	0	3	1	1	1	23.4	0	1	6	0	0	0	0	0	0	0	1	1	0	34160031	0	3	3	3	34160031	341600	0	0	-.15	-.01
3416003115	4	1	1	1	0	0	33.4	0	1	4	1	0	0	0	0	0	1	1	0	0	34160031	0	2	2	1	34160031	341600	0	.1	.21	.19
3416003115	4	0	2	1	1	1	25.9	0	1	3	1	0	1				0	1	1	1	34160031	0	2	1		34160031	341600	0	-.35	1.12	.23
3416003116	4	1	2	0	0	1	31.3	0	1	6	1	0	1	0	0	0	1	1	1	0	34160031	0	3	1	1	34160031	341600	0	.95	-.53	.38
3416003117	4	0	2	0	1	1	28	0	1	4	0	0	1	1	1	0	0	1	1	1	34160031	0	2	1	3	34160031	341600	0	-2.55	4.43	.45
3416003118	4	0	3	1	1	1	23.4	0	1	2	1	1	0	1	0	0	0	1	1	1	34160031	0	1	3		34160031	341600	0	.33	1.01	.82
3416003201	4	1	3	1	1	1	25.3	0	1	3	1	0	0	0	0	0	1	1	0	0	34160032	0	2	2	1	34160032	341600	0	1.51	-.08	1.1
3416003201	4	0	1	1	0	1	28	0	1	2	1	1	0	0	0	0	0	1	1	0	34160032	1	1	2		34160032	341600	0	3.38	.23	2.71
3416003202	4	1	1	0	1	1	31.9	0	1	4	1	0	1	0	0	0	1	1	0	0	34160032	0	2	1	1	34160032	341600	0	-.55	-2.26	-1.62
3416003202	4	0	2	1	1	1	25.5	0	1	4	1	0	0	0	0	0	0	1	0	0	34160032	0	2	2	3	34160032	341600	0	-1.03	-.69	-1.04
3416003203	4	1	1	1	1	1	36	0	1	5	1	0	0	1	0	0	1	1	1	0	34160032	0	3	2	1	34160032	341600	0	.28	-1.67	-.57
3416003203	4	0	2	1	1	1	22.6	0	1	1	0	1	0	0	0	0	0	1	1	1	34160032	0	1	2	3	34160032	341600	0	.12	-1.04	-.46
3416003204	4	1	1	1	0	1	32.4	0	1	5	1	0	0	0	0	0	1	1	0	0	34160032	0	3	2	1	34160032	341600	0	.01	-.69	-.33
3416003204	4	0	1	0	0	0	30.3	0	1	3	1	0	0	0	1	0	0	0	1	0	34160032	0	2	2	3	34160032	341600	0	-.61	.24	-.33
3416003205	4	1	1	0	1	1	35.4	0	1	5	1	0	0	0	0	0	1	1	0	0	34160032	1	3	3	1	34160032	341600	0	-.25	-.04	-.19
3416003205	4	0	2	1	1	1	26.9	0	1	1	1	1	0	0	0	0	0	0	1	0	34160032	0	1	2		34160032	341600	0	3.14	-2.99	.17
3416003206	4	1	1	0	0	1	29.2	0	1	3	1	0	1	0	1	1	1	1	1	0	34160032	0	2	1	1	34160032	341600	0	.36	-.05	.24
3416003207	4	1	1	1	0	1	30.1	0	1	3	1	0	0	0	0	0	0	1	1	0	34160032	1	2	3	3	34160032	341600	0	0	.76	.35
3416003207	4	0	2	1	1	1	26.6	0	1	6	1	0	0	1	0	0	0	1	1	0	34160032	0	3	2	3	34160032	341600	0	.76	-.19	.41
3416003208	4	1	2	1	0	1	27.5	0	1	4	1	0	0	0	0	0	1	1	1	0	34160032	0	2	3	1	34160032	341600	0	.82	-.24	.53
3416003208	4	0	2	1	1	1	25.5	0	1	2	1	1	0	1	0	0	0	1	1	1	34160032	0	1	2	3	34160032	341600	0	1.07	-.31	.63
3416003209	4	1	1	0	0	1	31.9	0	1	1	1	1	1	0	0	0	0	1	0	0	34160032	1	1	1	3	34160032	341600	0	1.48	-.61	.7
3416003209	4	0	3	0	0	1	31	0	1	1	1	1	0	0	0	0	0	0	0	1	34160032	0	1	2	3	34160032	341600	0	-.48	3.59	1.31
3416003210	4	1	3	1	1	1	24.6	0	1	4	1	0	0	0	0	0	1	1	0	0	34160032	1	2	3	1	34160032	341600	0			1.32
3416003210	4	0	2	1	1	1	29.1	0	1	5	0	0	0	0	0	0	0	1	1	0	34160032	0	3	2	3	34160032	341600	0
3416003211	4	1	1	0	1	1	22.8	0	1	4	0	0	1	0	0	0	1	1	0	1	34160032	0	2	1	1	34160032	341600	0
3416003211	4	0	3	1	1	1	22.6	0	1	3	0	0	0	1	1	0	1	0	1	0	34160032	0	2	2	1	34160032	341600	0
3416003212	4	1	1	1	1	1	28.3	0	1	4	1	0	0	0	0	0	1	1	0	0	34160032	0	2	3	1	34160032	341600	0
3416003212	4	0	2	1	1	1	23.8	0	1	2	0	1	0	0	0	0	1	1	1	0	34160032	0	1	2	1	34160032	341600	0
3416003213	4	1	2	1	1	1	24.1	0	1	2	0	1	1	0	0	0	0	1	0	0	34160032	1	1	1	3	34160032	341600	0
3416003213	4	0	1	1	1	1	22.6	0	1	2	1	1	0	0	0	0	0	1	1	0	34160032	1	1	2	3	34160032	341600	0
3416003214	4	1	3	0	1	1	24.8	0	1	1	1	1	1	0	0	0	0	1	1	0	34160032	0	1	1	3	34160032	341600	0
3416003214	4	0	1	1	1	1	28.1	0	1	4	1	0	0	0	0	0	0	1	1	0	34160032	1	2	2	3	34160032	341600	0
3416003215	4	1	1	0	0	1	35	0	1	5	1	0	1	0	0	0	1	1	1	0	34160032	0	3	1	1	34160032	341600	0
3416003215	4	0	3	0	1	1	27.2	0	1	2	1	1	0	0	0	0	0	0	1	0	34160032	0	1	2	3	34160032	341600	0
3416003216	4	1	1	0	0	1	37.7	0	1	3	1	1	1	0	0	1	1	1	1	0	34160032	0	2	1	1	34160032	341600	0
3416003216	4	0	1	1	0	1	26.6	0	1	2	0	0	0	1	1	0	0	1	1	0	34160032	1	1	2	3	34160032	341600	0
3416003301	4	1	1	0	0	0	34.8	0	1	4	0	0	0	1	0		1	1	1	0	34160033	1	2	3	1	34160033	341600	0
3416003301	4	0	1	1	1	1	27.2	0	1	2	1	0	1	1	1	0	0	1	0	0	34160033	0	1	1	3	34160033	341600	0
3416003302	4	1	3	1	0	1	30.5	0	1	3	1	0	0	0	0	0	1	1	1	0	34160033	0	2	2	1	34160033	341600	0
3416003302	4	0	2	1	1	1	21.8	0	1	2	1	1	0	0	0	0	0	1	1	0	34160033	1	1	3	2	34160033	341600	0	-1.36	-1.07	-1.45
3416003303	4	1	1	0	0	1	32.5	0	1	3	1	1	1	0	0	0	1	1	1	0	34160033	0	2	1	1	34160033	341600	0	-1.43	-.75	-1.39
3416003303	4	0	1	1	0	1	27.3	0	1	3	0	1	1	1	1	0	0	1	1	0	34160033	1	2	1	3	34160033	341600	0	-.29	-1.42	-.86
3416003304	4	1	2	0	0	1	28.7	0	1	5	1	0	1	0	0	0	1	1	1	0	34160033	0	3	1	1	34160033	341600	0	-.26	-1.01	-.82
3416003304	4	0	2	0	1	1	26.5	0	1	3	1	0	0	0	0	0	0	1	1	0	34160033	0	2	3	3	34160033	341600	0	-.38	-.84	-.68
3416003305	4	1	1	0	1	1	23.6	0	1	2	1	1	1	0	0	0	0	1	0	0	34160033	0	1	1	3	34160033	341600	0	.08	-1.22	-.55
3416003305	4	0	1	0	1	1	23	0	1	3	0	0	0	1	1	0	0	1	1	0	34160033	0	2	3	3	34160033	341600	0	-.71	.21	-.43
3416003306	4	1	1	1	0	1	36.7	0	1	4	1	0	0	0	0	0	1	1	0	0	34160033	0	2	3	1	34160033	341600	0			-.42
3416003306	4	0	1	0	1	1	23.7	0	1	3	1	0	0	1	1	0	0	1	1	1	34160033	1	2	3	3	34160033	341600	0	.42	-.97	-.25
3416003307	4	0	2	1	1	1	21.7	0	1	2	1	1	1	0	0	0	0	1	1	0	34160033	1	1	1	3	34160033	341600	0	-.86	1.14	.2
3416003308	4	1	1	1	0	1	28.6	0	1	3	1	0	1		1		1	1	0	0	34160033	0	2	1	1	34160033	341600	0	-.01	.6	.24
3416003308	4	0	2	0	0	1	33.7	0	1	2	0	1	0	0	0	0	0	0	1	1	34160033	0	1	3	3	34160033	341600	0	-1.72	3.51	.54
3416003309	4	1	1	1	1	1	27	0	1	4	0	0	0	0	0	0	1	1	1	0	34160033	0	2	2	1	34160033	341600	0	.69	.1	.58
3416003309	4	0	1	0	1	1	26.3	0	1	2	0	1	1	0	0	0	0	0	1	0	34160033	0	1	1	3	34160033	341600	0	.88	-.02	.68
3416003310	4	1	2	0	1	1	27.9	0	1	4	0	0	0	0	0	0	1	1	1	0	34160033	0	2	2	1	34160033	341600	0	-1.19	3.13	.81
3416003311	4	1	1	0	1	1	23.6	0	1	3	1	0	0	0	0	0	1	1	1	0	34160033	0	2	2	1	34160033	341600	0	3.12	.68	2.69
3416003311	4	0	3	1	1	1	26.6	0	1	2	1	1	0	0	1	0	0	1	1	0	34160033	0	1	3	3	34160033	341600	0
3416003312	4	1	1	1	0	1	29	0	1	4	1	0	0	0	0	1	0	1	1	0	34160033	1	2	2	2	34160033	341600	0
3416003312	4	0	2	1	0	1	28.3	0	1	6	1	0	1	0	0	0	0	0	1	0	34160033	0	3	1	3	34160033	341600	0
3416003313	4	1	1	1	0	1	30	0	1	4	1	0	0	0	0	0	1	1	1	0	34160033	1	2	2	1	34160033	341600	0
3416003314	4	1	1	0	1	1	23	0	1	4	1	0	0	0	0	0	1	1	1	1	34160033	0	2	2	1	34160033	341600	0
3416003314	4	0	2	1	1	0	24.5	0	1	6	1	0	0	0	0	0	0	1	1	0	34160033	0	3	3	3	34160033	341600	0
3416003315	4	1	1	1	1	1	22.9	0	1	5	0	0	0	0	0	1	1	1	0	0	34160033	0	3	2	1	34160033	341600	0
3416003315	4	0	2	1	0	1	25.4	0	1	2	1	1	0	0	1	1	0	0	1	0	34160033	0	1	3	3	34160033	341600	0
3416003316	4	1	1	1	0	1	28	0	1	5	1	0	0	0	0	0	1	1	1	0	34160033	0	3	2	1	34160033	341600	0
3416003316	4	0	2	0	1	1	26.3	0	1	4	1	0	0	1	1	0	0	1	1	0	34160033	1	2	3	3	34160033	341600	0
3416003317	4	0	1	1	1	1	23.1	0	1	2	1	0	1	0	0	0	0	1	1	0	34160033	1	1	1	3	34160033	341600	0
3416003318	4	0	1	0	1	1	24.4	0	1	4	1	0	0	1	1	0	0	0	1	1	34160033	0	2	3	3	34160033	341600	0
3416003319	4	0	3	0	1	1	24.3	0	1	2	1	1	1	0	0	0	0	1	1	0	34160033	1	1	1	3	34160033	341600	0
3416003320	4	0	2	0	1	1	25.9	0	1	2	1	0	0	0	1	1	1	1	1	1	34160033	1	1	3	1	34160033	341600	0
3416003401	4	1	2	1	0	1	27.8	0	1	3	1	0	0	0	0	0	1	1	1	0	34160034	0	2	2	1	34160034	341600	0
3416003401	4	0	3	0	1	1	25.1	0	1	4	1	0	0	1	0	0	1	0	1	1	34160034	1	2	2	1	34160034	341600	0
3416003402	4	1	3	0	0	1	31.6	0	1	6	1	0	0	0	0	0	1	1	0	0	34160034	0	3	2	1	34160034	341600	0		-1.16
3416003402	4	0	3	1	1	1	27.3	0	1	2	1	1	0	0	0	0	0	1	1	0	34160034	0	1	2	3	34160034	341600	0	-.19	-1.53	-1.49
3416003403	4	1	1	1	1	1	25	0	1	3	1	0	0	0	0	0	0	1	0	0	34160034	1	2	2	3	34160034	341600	0	-.86	-1.31	-1.31
3416003403	4	0	2	1	0	1	24	0	1	5	1	0	0	1	1	0	1	0	1	0	34160034	1	3	2	1	34160034	341600	0	-1.44	-.42	-1.24
3416003404	4	1	1	1	1	1	27	1	1	3	0	0	0	0	0	0	0	1	0	0	34160034	1	2	2	3	34160034	341600	0	-1.09	.18	-.7
3416003404	4	0	2	0	1	1	33.6	0	1	2	0	0	0	0	0	0	0	1	1	0	34160034	1	1	2	3	34160034	341600	0	-.36	-.75	-.63
3416003405	4	1	1	0	1	1	22.7	0	1	2	1	1	1	0	0	0	0	1	1	0	34160034	0	1	1	3	34160034	341600	0	-.89	.1	-.5
3416003405	4	0	2	0	1	1	23.8	0	1	3	1	0	0	1	1	0	0	1	1	0	34160034	0	2	2	3	34160034	341600	0	.25	-1.16	-.4
3416003406	4	1	2	1	0	1	32.3	0	1	2	1	1	1	0	0	1	0	1	0	0	34160034	1	1	1	3	34160034	341600	0	-.78	.52	-.36
3416003406	4	0	2	0	0	1	29.1	0	1	2	1	1	0	0	0	0	0	1	1	0	34160034	0	1	2	3	34160034	341600	0	.21	-.76	-.22
3416003407	4	1	2	1	1	1	27.6	0	1	5	0	1	0	0	0	0	0	1	0	0	34160034	0	3	2	3	34160034	341600	0	-.7	.53	-.21
3416003407	4	0	3	0	0	1	31.4	0	1	4	1	0	0	0	0	0	0	0	1	0	34160034	0	2	2	3	34160034	341600	0	3.82	-4.98	-.03
3416003408	4	1		1	0	1	25	0	1	3	0	0	0	0	0	0	1	0	1	0	34160034	0	2	2	1	34160034	341600	0	1.06	-1.51	.12
3416003408	4	0	2	0	0	1	29.5	0	1	5	1	0	0	1	1	0	0	0	1	0	34160034	0	3	2	3	34160034	341600	0	.2	.39	.32
3416003409	4	1	2	1	0	1	28	0	1	2	0	0	0	0	0	1	0	1	1	0	34160034	0	1	2	3	34160034	341600	0	1.48	-1.08	.41
3416003409	4	0	2	1	1	0	25.4	0	1	1	1	1	0	0	0	0	0	1	0	0	34160034	0	1	2	3	34160034	341600	0	1.78	-1.11	.67
3416003410	4	1	1	1	0	1	30	0	1	2	1	0	0	0	0	0	1	0	0	0	34160034	0	1	2	1	34160034	341600	0	-.51	-2.89	-1.99
3416003410	4	0	2	0	1	1	27.7	0	0	3	1	0	0	0	1	0	0	0	1	0	34160034	1	2	2	3	34160034	341600	0	-.6	-1.93	-1.53
3416003411	4	1	1	1	1	1	22	0	1	3	1	0	0	0	0	0	1	1	1	0	34160034	0	2	2	1	34160034	341600	0	-1.14	-1.05	-1.36
3416003411	4	0	2	1	1	1	23.8	0	1	1	0	1	0	0	0	0	0	1	1	0	34160034	1	1	2	3	34160034	341600	0	-.44	-1.45	-1.07
3416003412	4	1	1	1	0	1	28.9	0	1	6	0	0	0	1	1	1	1	0	0	0	34160034	1	3	2	1	34160034	341600	0	-.54	-1.14	-.99
3416003412	4	0	1	0	0	1	26.2	0	1	2	0	1	0	1	0	0	0	1	1	0	34160034	0	1	2	3	34160034	341600	0	-.41	-.58	-.55
3416003413	4	1	2	1	1	1	24.8	0	1	3	1	0	0	0	0	0	0	1	0	0	34160034	0	2	2	3	34160034	341600	0	.37	-1.14	-.31
3416003413	4	0	3	1	1	1	26.8	0	1	4	1	0	0	1	1	0	1	1	1	0	34160034	0	2	2	1	34160034	341600	0	.07	-.23	-.05
3416003414	4	1	2	1	1	1	25.4	0	1	2	0	0	1	0	0	0	0	1	1	0	34160034	1	1	1	3	34160034	341600	0	.44	-.51	.06
3416003414	4	0	2	1	1	0	25.2	0	1	4	1	0	0	1	1	0	0	1	0	0	34160034	1	2	2	3	34160034	341600	0	.33	-.27	.07
3416003415	4	1	1	1	1	1	25.8	0	1	4	1	0	0	0	0	0	1	1	0	0	34160034	1	2	2	1	34160034	341600	0	.88	-.69	.28
3416003416	4	1	1	0	0	1	30.8	0	1	1	1	1	1	0	0	0	0	1	0	0	34160034	0	1	1	3	34160034	341600	0	.89	-.06	.6
3416003417	4	1	2	1	1	1	26	0	1	5	1	0	0	0	0	0	1	1	0	0	34160034	0	3	2	1	34160034	341600	0	1.75	-.41	1.03
3416004101	4	1	1	1	1	1	24	0	1	5	1	0	0	0	0	0	1	1	0	0	34160041	0	3	2	1	34160041	341600	0	.99	1.18	1.28
3416004101	4	0	2	1	1	1	28.7	0	1	6	1	0	1	0	0	0	0	0	1	0	34160041	0	3	1	3	34160041	341600	0	3.86	-1.65	2.16
3416004102	4	1	1	1	0	1	27.1	0	1	6	1	0	0	0	0	0	1	1	1	0	34160041	0	3	3	1	34160041	341600	0	.17		3.04
3416004102	4	0	1	0	0	1	29.5	0	1	2	1	1	1	0	0	0	0	1	1	0	34160041	0	1	1	3	34160041	341600	0
3416004103	4	1	1	0	1	1	24	0	1	2	0	0	0	0	0	0	0	1	0	0	34160041	0	1	2	3	34160041	341600	0
3416004103	4	0	2	0	0	1	29.8	0	1	4	1	0	1	1	1	1	0	0	1	0	34160041	1	2	1	3	34160041	341600	0
3416004104	4	1	3	0	1	1	29	0	1	4	1	0	0	0	0	0	1	1	0	0	34160041	0	2	2	1	34160041	341600	0
3416004104	4	0	2	1	0	1	27.9	0	1	1	1	1	0	0	0	0	0	1	1	0	34160041	1	1	3	3	34160041	341600	0
3416004105	4	1	1	1	1	1	27.8	0	1	4	1	0	0	0	0	0	1	1	0	0	34160041	1	2	2	1	34160041	341600	0
3416004105	4	0	2	1	1	1	26.5	0	1	2	0	1	0	0	0	0	0	1	1	0	34160041	0	1	3	3	34160041	341600	0
3416004106	4	1	2	1	1	1	20.7	0	1	1	0	1	0	0	0	0	0	1	0	0	34160041	0	1	3	3	34160041	341600	0
3416004106	4	0	1	1	1	1	26.4	0	1	2	0	1	0	0	0	0	0	1	1	0	34160041	0	1	3	3	34160041	341600	0
3416004107	4	1	2	1	0	1	36.5	0	1	2	1	0	1	0	0	0	1	1	1	0	34160041	0	1	1	1	34160041	341600	0
3416004107	4	0	3	1	1	1	24.3	0	1	2	1	1	1	0	0	0	1	1	1	0	34160041	0	1	1	1	34160041	341600	0
3416004108	4	1	2	1	1	1	23.5	0	1	6	1	0	0	0	0	0	1	1	0	0	34160041	1	3	2	1	34160041	341600	0
3416004108	4	0	1	0	0	1	29.3	0	1	1	1	1	0	1	0	0	1	0	1	0	34160041	0	1	3	1	34160041	341600	0
3416004109	4	1	3	1	0	1	31.8	0	1	1	1	1	1	0	0	0	0	1	0	0	34160041	0	1	1	3	34160041	341600	0
3416004109	4	0	2	0	0	0	24.8	0	1	4	0	0	0	0	0	0	1	0	1	0	34160041	0	2	3	1	34160041	341600	0
3416004110	4	1	2	1	0	1	25.6	0	1	4	1	0	1	0	0	0	1	1	1	0	34160041	0	2	1	1	34160041	341600	0
3416004110	4	0	1	0	1	1	26.2	0	1	4	1	0	0	0	0	0	0	1	1	0	34160041	0	2	3	3	34160041	341600	0
3416004111	4	1	2	0	0	1	27.3	0	1	1	1	1	1	0	0	0	0	1	0	0	34160041	1	1	1	3	34160041	341600	0
3416004111	4	0	3	0	1	1	25.1	0	1	2	1	1	0	1	1	0	0	1	1	0	34160041	0	1	3	3	34160041	341600	0
3416004112	4	1	1	0	0	1	31.1	0	1	6	1	0	0	0	0	0	1	1	0	0	34160041	0	3	3	1	34160041	341600	0
3416004112	4	0	1	0	1	0	27.5	0	1	4	0	0	0	1	1	0	1	1	1	0	34160041	0	2	3	1	34160041	341600	0
3416004113	4	1	3	1	0	1	26.8	0	1	3	1	0	0	0	0	0	1	1	1	0	34160041	0	2	3	1	34160041	341600	0
3416004113	4	0	3	1	1	0	26	0	1	2	1	1	0	0	0	0	0	1	1	0	34160041	1	1	3	3	34160041	341600	0
3416004114	4	1	2	0	0	1	34.9	0	1	4	1	0	1	1	1	0	1	1	1	0	34160041	0	2	1	1	34160041	341600	0
3416004114	4	0	2	0	1	1	23.8	0	1	2	1	1	1	0	0	0	0	1	1	0	34160041	0	1	1	3	34160041	341600	0
3416004115	4	1	2	0	0	1	28.3	0	1	1	1	1	1	0	0	0	0	1	1	0	34160041	1	1	1	3	34160041	341600	0
3416004115	4	0	1	0	1	1	24.8	0	1	1	1	1	1	0	0	0	0	1	0	0	34160041	0	1	1	3	34160041	341600	0
3416004116	4	1	2	0	1	1	21.8	0	1	1	0	1	0	0	0	0	0	1	0	0	34160041	0	1	3	3	34160041	341600	0
3416004116	4	0	2	1	1	1	23.6	0	1	3	0	0	0	0	0	0	0	1	1	0	34160041	0	2	2	3	34160041	341600	0
3416004117	4	0	2	1	1	1	27.4	0	1	3	1	1	1	1	1	0	0	1	1	1	34160041	0	2	1	3	34160041	341600	0
3416004118	4	0	3	1	1	1	24	0	1	3	1	1	0	0	0	1	0	1	1	0	34160041	0	2	2	3	34160041	341600	0
3416004201	4	1	1	1	1	1	25.9	0	1	3	0	0	0	0	0	0	1	1	1	0	34160042	0	2	2	1	34160042	341600	0	-2.6	.77	-1.53
3416004201	4	0	2	0	1	1	25.3	0	1	3	1	0	0	1	0	0	1	1	1	0	34160042	0	2	2	1	34160042	341600	0	-.05	-2.43	-1.3
3416004202	4	1	1	0	0	1	26.4	0	1	3	0	0	1	1	1	0	1	1	0	0	34160042	1	2	1	1	34160042	341600	0	-.3	-1.21	-.85
3416004202	4	0	3	0	0	1	27.6	0	1	1	1	1	0	0	0	0	0	1	1	0	34160042	0	1	2	3	34160042	341600	0	.82	-2.51	-.83
3416004203	4	1	2	1	0	1	30.8	0	1	2	1	1	1	0	0	0	0	1	1	0	34160042	0	1	1	3	34160042	341600	0	-.55	-.92	-.8
3416004203	4	0	3	0	1	1	29.3	0	1	2	1	1	0	0	0	0	0	1	1	0	34160042	0	1	2	3	34160042	341600	0	-.46	-.7	-.71
3416004204	4	1	2	1	0	1	30.8	0	1	4	0	0	1	0	0	0	1	1	0	0	34160042	0	2	1	1	34160042	341600	0	-.58	-.42	-.58
3416004204	4	0	2	1	1	1	25.8	0	1	3	0	1	0	1	1	0	0	1	1	0	34160042	1	2	2	3	34160042	341600	0	-.82	-.08	-.58
3416004205	4	0	3	0	0	1	30.8	0	1	5	1	0	0	0	0	0	1	1	1	0	34160042	0	3	2	1	34160042	341600	0	.22	-.93	-.3
3416004206	4	1	1	1	0	1	31.9	0	1	5	0	0	0	1	0	0	1	1	1	0	34160042	0	3	3	1	34160042	341600	0	.06	-.55	-.25
3416004206	4	0	3	0	0	0	31.8	0	1	6	0	0	0	0	1	0	0	1	1	0	34160042	0	3	2	3	34160042	341600	0	-.69	.4	-.22
3416004207	4	1	2	1	0	1	33.8	0	1	5	0	0	1	0	0	0	1	1	1	0	34160042	0	3	1	1	34160042	341600	0	.31	-.56	-.07
3416004207	4	0	3	1	1	1	26	0	1	1	0	1	0	0	0	0	0	1	1	0	34160042	0	1	2	3	34160042	341600	0	1.31	-1.74	.03
3416004208	4	1	2	1	0	1	24.9	0	1	2	0	0	0	0	0	0	1	1	1	0	34160042	0	1	2	1	34160042	341600	0	.52	.14	.45
3416004208	4	0	2	1	0	1	29.7	0	1	4	0	0	0	1	0	0	0	1	1	1	34160042	0	2	2	3	34160042	341600	0	.41	.31	.46
3416004209	4	1	1	1	1	1	25.9	0	1	4	1	0	0	0	0	0	1	1	0	0	34160042	0	2	2	1	34160042	341600	0	.23	.77	.5
3416004209	4	0	1	0	1	1	26.3	0	1	4	1	0	0	0	0	0	0	1	1	0	34160042	0	2	2	3	34160042	341600	0
3416004210	4	1	1	1	0	1	25.9	0	1	3	1	0	0	0	0	0	1	1	1	0	34160042	0	2	2	1	34160042	341600	0
3416004210	4	0	3	0	0	1	28.1	0	1	3	1	1	0	0	0	0	0	1	1	1	34160042	1	2	2	2	34160042	341600	0
3416004211	4	1	3	1	0	1		0	1	3	1	0	0	0	0	0	0	1	1	0	34160042	0	2	2	2	34160042	341600	0
3416004211	4	0	2	1	0	1	34	0	1	5	0	0	0	0	0	0	0	0	1	1	34160042	1	3	2	3	34160042	341600	0
3416004212	4	1	1	1	0	1	28.4	0	1	3	1	0	0	0	0	0	1	1	1	1	34160042	0	2	2	1	34160042	341600	0
3416004212	4	0	2	1	1	1	22.6	0	1	1	1	1	0	0	0	0	0	1	1	0	34160042	0	1	2		34160042	341600	0
3416004213	4	0	2	0	0	1	30.4	0	1	2	1	1	0	0	0	0	0	1	1	0	34160042	0	1	2	3	34160042	341600	0
3416004214	4	1	2	1	0	1	27.2	0	1	4	1	0	0	1	0	0	1	0	1	0	34160042	1	2	2	1	34160042	341600	0
3416004214	4	0	1	0	1	1	26.9	0	1	2	0	1	0	0	0	0	0	1	1	0	34160042	1	1	2	3	34160042	341600	0
3416004215	4	1	1	0	0	1	30.9	0	1	4	1	0	0	0	1	1	1	1	1	0	34160042	0	2	2	1	34160042	341600	0
3416004215	4	0	3	1	1	1	25.1	0	1	6	1	0	0	0	0	0	0	1	1	0	34160042	0	3	2	3	34160042	341600	0
3416004216	4	1	1	0	0	1	30.3	0	1	3	1	0	0	0	0	0	1	1	1	0	34160042	0	2	2	1	34160042	341600	0
3416004216	4	0	2	1	1	1	24.6	0	1	2	0	0	0	0	1	0	0	1	1	1	34160042	0	1	2	3	34160042	341600	0
3416004217	4	1	3	1	1	1	25.3	0	1	4	0	0	0	0	0	0	1	1	1	0	34160042	0	2	2	1	34160042	341600	0
3416004217	4	0	1	1	1	1	27.5	0	1	1	0	1	0	0	0	0	0	1	1	0	34160042	0	1	2		34160042	341600	0			-3.64
3416004218	4	0	2	0	1	1	29.3	0	1	3	1	0	0	1	1	0	0	1	1	0	34160042	0	2	2	3	34160042	341600	0	-.72	-1.09	-1.08
3416004219	4	0	1	1	0	0	30.3	0	1	2	1	1	0	0	0	0	0	1	1	0	34160042	0	1	2	3	34160042	341600	0	-.99	-.01	-.65
3416004220	4	0	2	0	1	0	27.3	0	1	4	1	0	0	0	0	0	0	1	1	1	34160042	0	2	2	3	34160042	341600	0	-.21	-.48	-.36
3416004221	4	0	3	1	1	1	27.7	0	1	3	0	0	0	0	0	0	0	1	1	0	34160042	0	2	2	3	34160042	341600	0	.18	-.97	-.35
3416004222	4	0	3	0	0	1	29.3	0	1	4	0	0	0	0	0	0	0	1	1	0	34160042	0	2	2	3	34160042	341600	0	-.06	-.63	-.35
3416004301	4	1	2	1	1	1	28.4	0	1	4	1	0	1	0	0	0	1	1	0	0	34160043	0	2	1	1	34160043	341600	0	-.7	.64	-.23
3416004301	4	0	2	0	1	1	27.3	0	1	1	0	1	0	0	0	0	0	1	1	0	34160043	0	1	2		34160043	341600	0	-.13	-.33	-.21
3416004302	4	1	2	1	0	0	32.6	0	1	2	1	1	1	1	0	0	0	1	1	0	34160043	0	1	1	3	34160043	341600	0	.12	-.49	-.14
3416004302	4	0	3	0	1	0	23.7	0	1	3	1	1	0	0	0	0	0	1	0	1	34160043	0	2	2	3	34160043	341600	0	.44	-1.02	-.13
3416004303	4	1	1	0	0	1	30.2	0	1	1	0	1	0	0	0	0	0	1	0	0	34160043	0	1	3	3	34160043	341600	0	.23	0	.16
3416004303	4	0	2	1	1	1	24.6	0	1	1	0	1	0	0	0	0	0	1	0	0	34160043	0	1	2		34160043	341600	0	1.37	-1.37	.25
3416004304	4	1	1	0	0	1	31.2	0	1	3	1	0	0	0	0	0	1	0	0	0	34160043	0	2	3	1	34160043	341600	0	.14	.82	.52
3416004304	4	0	2	1	1	1	24.8	0	1	4	1	0	0	1	0	0	0	1	1	0	34160043	0	2	2	3	34160043	341600	0	.73	.29	.68
3416004305	4	1	3	1	0	1	32.8	0	1	2	0	1	1	0	0	0	0	1	0	0	34160043	0	1	1	3	34160043	341600	0	1.01	.52	.97
3416004305	4	0	2	0	1	1	25.8	0	1	2	1	1	0	0	0	0	0	1	1	0	34160043	1	1	2	3	34160043	341600	0	.8	5.88	3.08
3416004306	4	1	1	1	0	1		0	1	6	0	0	0	1	0	0	1	1	1	0	34160043	0	3	2	1	34160043	341600	0
3416004306	4	0	2	1	1	0	25.8	0	1	2	1	1	0	0	0	0	0	1	1	0	34160043	0	1	2	3	34160043	341600	0
3416004307	4	1	1	0	1	1	30	0	1	5	1	0	0	0	0	0	1	1	1	0	34160043	0	3	2	1	34160043	341600	0
3416004307	4	0	3	1	1	0	23.9	0	1	4	1	1	0	1	1	0	0	1	1	0	34160043	0	2	2	3	34160043	341600	0
3416004308	4	1	1	1	0	1	32.5	0	1	6	1	0	0	0	0	0	1	1	0	0	34160043	0	3	2	1	34160043	341600	0
3416004308	4	0	2	0	0	1	29.8	0	1	1	1	1	0	0	0	0	0	1	1	0	34160043	1	1	2	3	34160043	341600	0
3416004309	4	1	1	1	1	1	26.8	1	1	6	1	0	0	0	0	0	1	0	0	0	34160043	0	3	2	1	34160043	341600	0
3416004309	4	0	3	1	1	1	23.2	0	1	4	1	1	0	0	0	0	0	1	1	0	34160043	1	2	2	3	34160043	341600	0
3416004310	4	1	1	0	0	1	32	0	1	2	0	0	1	0	0	0	0	1	1	0	34160043	1	1	1	3	34160043	341600	0
3416004310	4	0	1	0	1	1	26.3	0	1	5	1	0	0	1	1	0	0	1	0	0	34160043	0	3	2	3	34160043	341600	0
3416004311	4	1	1	0	0	1	35.1	0	1	2	0	1	1	0	0	0	0	1	0	0	34160043	0	1	1	3	34160043	341600	0
3416004312	4	0	1	0	1	0	26.9	0	1	2	0	1	0	0	0	0	0	1	1	0	34160043	1	1	2	3	34160043	341600	0
3416004313	4	1	1	1	0	1		0	1	3	1	0	0	0	0	0	1	1	1	1	34160043	0	2	2	1	34160043	341600	0
3416004314	4	1	2	1	0	1	27.7	0	1	1	1	1	0	0	0	0	0	1	1	0	34160043	0	1	3	3	34160043	341600	0
3416004314	4	0	3	0	1	1	25.5	0	1	4	0	0	0	1	0	0	0	1	1	1	34160043	0	2	2	3	34160043	341600	0
3416004315	4	1	3	0	0	1	33	0	1	4	1	0	0	1	0	0	1	1	0	0	34160043	1	2	2	1	34160043	341600	0
3416004315	4	0	3	1	1	1	26	0	1	1	1	1	0	0	0	1	0	1	1	0	34160043	0	1	2	3	34160043	341600	0		-2.21
3416004316	4	1	1	1	0	1	27.1	0	1	1	1	1	1	0	0	0	0	1	0	0	34160043	0	1	1	3	34160043	341600	0	-4.51	-1.17	-3.89
3416004316	4	0	3	1	1	1	23.5	0	1	1	0	1	0	0	0	0	0	1	1	0	34160043	0	1	2	3	34160043	341600	0	-.9	-2.94	-2.5
3416004317	4	0	1	1	1	1	21.8	0	1	2	1	1	0	0	1	0	0	1	1	0	34160043	0	1	2	3	34160043	341600	0	-.59	-2.07	-1.52
3416004401	4	1	3	0	0	1	34.5	0	1	4	0	0	0	0	0	0	1	0	1	0	34160044	1	2	2	1	34160044	341600	0	1.58	-4.1	-1.08
3416004401	4	0	1	0	1	0	24	0	1	1	0	1	0	0	0	0	0	1	1	0	34160044	0	1	3		34160044	341600	0	-1.1	-.46	-.97
3416004402	4	1	2	0	1	1	25.4	0	1	4	1	0	0	0	0	0	1	1	0	0	34160044	0	2	2	1	34160044	341600	0	.49	-1.65	-.39
3416004402	4	0	1	0	0	1	29.3	0	1	2	1	1	1	0	0	0	0	1	1	0	34160044	0	1	1	3	34160044	341600	0	2.42	-4.33	-.35
3416004403	4	1	2	1	0	1	31.1	0	1	4	1	0	0	0	0	0	1	1	1	0	34160044	1	2	3	1	34160044	341600	0	-.48	.1	-.26
3416004403	4	0	3	1	1	0	29	0	1	3	0	0	1	0	1	0	0	1	1	0	34160044	1	2	1	3	34160044	341600	0	-.66	.59	-.24
3416004404	4	1	2	1	0	1	31.1	0	1	6	0	0	0	0	0	0	1	1	0	0	34160044	1	3	3	1	34160044	341600	0	.15	-.55	-.16
3416004404	4	0	2	0	1	1	24.7	0	1	2	1	1	1	0	0	0	0	1	1	0	34160044	1	1	1	3	34160044	341600	0	-.08	.35	.05
3416004405	4	1	1	0	0	1	24	0	1	5	0	0	1	1	0	0	1	1	1	0	34160044	0	3	1	1	34160044	341600	0	1.13	-1.37	.1
3416004405	4	0	2	0	1	0	27.6	0	1	2	1	1	0	0	0	0	0	1	1	0	34160044	0	1	3	3	34160044	341600	0	.31	-.14	.13
3416004406	4	1	1	0	0	1	24	0	1	2	1	1	1	0	0	0	0	0	1	0	34160044	0	1	1	3	34160044	341600	0	-.72	1.36	.21
3416004406	4	0	2	1	1	1	25	0	1	4	0	0	0	0	0	0	0	1	1	0	34160044	0	2	3	3	34160044	341600	0	-.2	2.29	1
3416004407	4	1	1	1	0	1	34.8	0	1	3	1	0	1	1	1	1	1	1	1	0	34160044	1	2	1	1	34160044	341600	0
3416004407	4	0	1	0	1	1	25.8	0	1	4	0	0	1	1	1	0	0	1	1	0	34160044	0	2	1	3	34160044	341600	0
3416004408	4	1	2	1	0	1	29.7	0	1	2	1	0	0	0	0	1	0	1	1	0	34160044	0	1	2	3	34160044	341600	0
3416004408	4	0	3	0	0	0	28.2	0	1	2	1	1	1	1	0	0	0	1	1	1	34160044	0	1	1	3	34160044	341600	0
3416004409	4	1	1	1	0	1	34.8	0	1	6	0	0	1	0	0	0	1	1	1	0	34160044	0	3	1	1	34160044	341600	0
3416004409	4	0	1	0	1	0	26.4	0	1	4	0	0	0	1	1	0	0	1	1	0	34160044	0	2	3	3	34160044	341600	0
3416004410	4	1	2	1	0	1	34.9	0	1	2	1	1	1	0	0	0	1	1	1	0	34160044	1	1	1	1	34160044	341600	0
3416004410	4	0	2	0	0	0	29.3	0	1	1	1	1	0	0	0	0	0	1	0	0	34160044	0	1	3	3	34160044	341600	0
3416004411	4	1	1	0	0	1	28.9	0	1	5	1	0	0	0	0	1	1	0	0	0	34160044	1	3	3	1	34160044	341600	0
3416004411	4	0	1	1	0	1	29.6	0	1	2	1	1	1	0	0	0	0	1	1	0	34160044	0	1	1	3	34160044	341600	0
3416004412	4	1	2	0	1	1	28.5	0	1	4	0	0	0	0	0	0	1	0	0	0	34160044	0	2	2	1	34160044	341600	0
3416004412	4	0	2	0	1	1	26.7	0	1	4	1	0	1	0	0	0	0	1	1	0	34160044	0	2	1	3	34160044	341600	0
3416004413	4	1	1	1	0	1	28.9	0	1	3	1	0	0	0	0	0	1	1	1	0	34160044	1	2	2	1	34160044	341600	0
3416004413	4	0	2	0	1	1	25.5	0	1	2	0	1	1	0	0	0	0	1	0	0	34160044	0	1	1	3	34160044	341600	0
3416004414	4	1	1	1	1	1	24.9	0	1	4	0	0	0	0	0	0	1	1	0	0	34160044	1	2	2	1	34160044	341600	0
3416004414	4	0	1	1	1	1	27.3	0	1	2	1	1	1	1	0	0	0	1	1	0	34160044	0	1	1	3	34160044	341600	0
3416004415	4	1	2	0	1	1		0	1	3	1	0	0	0	0	0	1	1	1	0	34160044	0	2	2	1	34160044	341600	0	-.9	-1.56	-1.47
3416004415	4	0	1	0	1	0	22.9	0	1	2	1	1	0	0	0	0	0	0	1	0	34160044	0	1	3		34160044	341600	0	.03	-1.93	-1.05
3416004416	4	1	2	1	1	1		0	1	3	0	0	0	0	0	0	1	1	0	0	34160044	1	2	2	1	34160044	341600	0	-.61	-1	-.89
3416004416	4	0	3	0	1	1	26.1	0	1	2	0	1	0	0	0	0	0	1	1	0	34160044	0	1	2	3	34160044	341600	0	-.13	-1.14	-.7
3416004417	4	0	1	0	0	1	30	1	1	3	1	1	0	1	1	0	0	1	1	0	34160044	0	2	3	3	34160044	341600	0	.65	-1.71	-.47
3416005101	4	1	3	1	1	1	21.8	0	0	2	0	1	0	0	0	0	0	1	0	0	34160051	0	1	3	3	34160051	341600	0	-.36	-.34	-.37
3416005102	4	1	3	1	1	1	29	0	1	6	0	0	0	0	0	0	1	1	1	0	34160051	0	3	2	1	34160051	341600	0	.14	-.85	-.32
3416005103	4	1	3	0	0	1	32.8	0	1	3	0	0	1	0	0	0	1	0	1	0	34160051	1	2	1	1	34160051	341600	0	-.07	-.48	-.24
3416005104	4	1	3	1	1	1	27.8	1	1	3	0	0	0	0	0	0	1	1	0	0	34160051	0	2	2	1	34160051	341600	0	-.16	-.08	-.14
3416005105	4	1	2	1	0	1	30.9	0	1	3	1	0	0	0	0	0	1	1	1	0	34160051	0	2	2	1	34160051	341600	0	.46	-.43	.16
3416005106	4	1	2	1	1	1	26.2	0	1	3	0	0	0	0	0	0	0	1	0	0	34160051	0	2	2	3	34160051	341600	0	.54	.38	.63
3416005107	4	1	2	1	1	1	23.8	0	1	5	0	0	0	0	0	0	1	1	0	0	34160051	0	3	2	1	34160051	341600	0	.84	.23	.75
3416005108	4	1	3	1	1	1	24.8	0	1	1	1	1	1	0	0	0	0	1	0	0	34160051	1	1	1	3	34160051	341600	0	.59	.96	.86
3416005109	4	1	3	0	1	1	28.2	0	1	2	1	0	0	0	0	0	1	1	1	0	34160051	0	1	3	1	34160051	341600	0	-.44	2.7	1
3416005110	4	1	3	1	1	1	21.5	1	1	2	1	1	1	0	0	0	0	1	1	0	34160051	0	1	1	3	34160051	341600	0	.64	1.06	1.18
3416005111	4	1	3	1	1	1	28	0	1	6	0	0	0	0	1	1	1	1	0	0	34160051	1	3	3	1	34160051	341600	0	2.42	-.48	1.57
3416005112	4	1	3	1	1	1	27.8	0	1	4	1	0	1	0	0	0	1	1	1	0	34160051	0	2	1	1	34160051	341600	0
3416005113	4	1	3	1	1	1	21.9	1	1	2	1	0	0	0	0	0	0	1	0	0	34160051	0	1	2	3	34160051	341600	0
3416005114	4	1	3	0	1	0	29.4	1	1	5	1	0	0	0	0	0	1	1	1	0	34160051	0	3	2	1	34160051	341600	0
3416005115	4	1	3	0	1	1	24.7	1	1	3	0	0	1	0	0	0	1	1	1	0	34160051	0	2	1	1	34160051	341600	0
3416005116	4	1	2	0	0	1	30.8	0	1	4	1	0	0	0	0	0	1	1	0	0	34160051	0	2	2	1	34160051	341600	0
3416035101	4	0	2	1	0	1	26.8	0	1	1	1	1	0	0	0	0	0	1	0	0	34160051	0	1	3	3	34160051	341600	0
3416035102	4	0	1	1	0	0	29.8	0	1	2	0	1	0	0	0	0	0	1	1	1	34160051	1	1	3	3	34160051	341600	0
3416035103	4	0	3	0	1	1	27.7	0	1	3	1	0	0	1	1	0	1	0	1	0	34160051	0	2	3	1	34160051	341600	0
3416035104	4	0	1	1	0	1	30.9	0	1	4	1	0	1	1	0	0	0	0	1	0	34160051	0	2	1	3	34160051	341600	0
3416035105	4	0	2	1	1	1	22.9	0	1	2	1	1	1	1	1	0	1	1	1	0	34160051	0	1	1	1	34160051	341600	0
3416035106	4	0	3	0	1	0	29.5	0	1	6	1	0	0	1	1	0	0	0	1	1	34160051	0	3	3	2	34160051	341600	0
3416035107	4	0	2	1	1	1	24.8	0	1	3	1	0	1	0	0	0	0	1	1	0	34160051	0	2	1	3	34160051	341600	0
3416035108	4	0	2	1	0	0	32.2	0	1	3	1	1	1	0	1	0	0	1	1	0	34160051	1	2	1	3	34160051	341600	0
3416035109	4	0	3	0	1	1	23.8	0	1	5	1	0	0	1	1	0	1	0	1	0	34160051	0	3	3	1	34160051	341600	0
3416035110	4	0	2	1	1	0	24.7	0	1	4	0	0	0	1	1	0	0	1	0	1	34160051	1	2	3	3	34160051	341600	0
3416035111	4	0	3	0	1	1	26	0	1	4	1	0	0	0	0	0	0	1	1	0	34160051	0	2	3	3	34160051	341600	0
3416035112	4	0	3	0	1	1	25.3	0	1	3	0	0	0	0	0	0	1	0	1	0	34160051	0	2	3	1	34160051	341600	0	-1.11	-3.12	-2.49
3416035113	4	0	2	0	1	1	24.9	0	1	5	0	0	0	0	1	1	0	0	1	0	34160051	1	3	3	3	34160051	341600	0	-1.8	-2.16	-2.38
3416035114	4	0	3	1	1	1	25.7	1	1	2	0	0	0	0	0	0	0	1	1	0	34160051	0	1	3	3	34160051	341600	0	-.72	-2.01	-1.66
3416035115	4	0	2	1	0	0	29.8	0	1	3	1	0	0	0	0	0	0	0	1	1	34160051	1	2	3	3	34160051	341600	0	-.49	-2.25	-1.44
3416035116	4	0	3	1	1	1	25.5	0	1	4	1	0	1	0	0	0	1	1	1	0	34160051	0	2	1	1	34160051	341600	0	-.99	-1.31	-1.32
3416005202	4	1	1	0	0	1	29.3	0	1	3	1	0	1	0	0	0	1	0	0	0	34160052	0	2	1	1	34160052	341600	0	-.75	-1.38	-1.23
3416005203	4	1	2	0	1	1	32.1	0	1	5	1	0	1	0	0	0	1	1	0	0	34160052	1	3	1	1	34160052	341600	0	.06	-1.75	-.9
3416005204	4	1	2	1	1	1	26.8	0	1	3	1	0	1	0	0	0	1	1	0	0	34160052	0	2	1	1	34160052	341600	0	-1.35	.05	-.9
3416005205	4	1	3	1	1	1	30.9	0	1	1	1	1	0	0	0	0	0	1	1	0	34160052	0	1	3	3	34160052	341600	0	2.07	-3.32	-.47
3416005206	4	1	2	1	1	1	24.9	0	1	2	0	0	1	0	0	0	0	1	1	0	34160052	0	1	1	3	34160052	341600	0	-.44	.52	-.1
3416005207	4	1	1	0	0	1	29.6	0	1	4	1	0	0	0	0	0	1	1	1	0	34160052	1	2	3	1	34160052	341600	0	.95	-1.31	.08
3416005208	4	1	2	0	1	1	32	0	1	4	0	0	1	0	0	0	1	1	0	0	34160052	0	2	1	1	34160052	341600	0	1.04	-.73	.43
3416005209	4	1	3	0	0	1	35.5	0	1	3	1	1	1	0	0	0	1	1	1	0	34160052	0	2	1	1	34160052	341600	0	2.36	-1.49	.63
3416005210	4	1	1	0	1	1	40.8	0	1	2	0	1	1	0	0	0	0	1	0	0	34160052	0	1	1	3	34160052	341600	0	.58	.89	.79
3416005211	4	1	3	1	0	1	29.4	0	1	5	1	0	0	0	0	0	1	1	1	0	34160052	0	3	3	1	34160052	341600	0	1.13	.77	1.18
3416005212	4	1	2	1	1	1	24.9	0	1	3	1	0	0	0	0	0	1	1	1	0	34160052	1	2	2	1	34160052	341600	0		-4.04	2.74
3416005213	4	1	2	1	1	1	26.4	0	1	2	1	1	0	0	0	0	0	1	1	0	34160052	0	1	2	3	34160052	341600	0
3416005214	4	1	2	1	1	1	25.9	0	1	5	1	0	0	0	0	0	1	1	1	0	34160052	0	3	2	1	34160052	341600	0
3416005215	4	1	3	1	1	1	24.9	1	1	4	1	0	0	0	0	0	1	0	1	0	34160052	1	2	2	1	34160052	341600	0
3416005216	4	1	3	1	1	1	26	0	1	2	1	0	0	0	0	0	0	1	1	0	34160052	1	1	2	3	34160052	341600	0
3416005217	4	1	2	0	0	1	26.8	0	1	4	1	0	0	0	0	0	1	1	1	0	34160052	1	2	2	1	34160052	341600	0
3416005218	4	1	2	1	0	1	32.9	0	1	2	1	0	0	0	0	0	0	1	0	0	34160052	0	1	2	3	34160052	341600	0
3416005219	4	1	3	1	1	1	28.9	0	1	6	1	0	0	0	0	0	1	1	1	0	34160052	0	3	2	1	34160052	341600	0
3416035201	4	0	2	0	1	1	26.3	0	1	6	0	0	0	1	1	0	0	1	0	0	34160052	1	3	2	3	34160052	341600	0
3416035202	4	0	3	0	1	1	26.4	0	1	3	0	0	0				0	1	1	0	34160052	0	2	2	3	34160052	341600	0
3416035203	4	0	1	1	1	0	27.5	0	1	6	1	0	0	0	0	0	0	1	1	0	34160052	0	3	2	3	34160052	341600	0
3416035204	4	0	2	0	1	1	28.9	0	1	6	1	0	0	0	0	0	0	0	1	1	34160052	0	3	2	3	34160052	341600	0
3416035205	4	0	3	0	1	1	27.8	0	1	6	1	0	0	0	0	0	0	0	1	0	34160052	1	3	2	3	34160052	341600	0
3416035206	4	0	2	0	1	0	24.9	0	1	3	1	0	0	1	0	0	1	0	1	0	34160052	1	2	2	1	34160052	341600	0
3416035207	4	0	1	1	1	0	25.4	0	1	2	1	0	0	1	1	0	0	1	1	0	34160052	0	1	2	3	34160052	341600	0
3416035208	4	0	3	0	1	1	25.6	0	1	4	0	0	0	0	0	0	0	1	1	1	34160052	0	2	2	3	34160052	341600	0
3416035210	4	0	1	0	0	1	29.7	0	1	1	1	1	0	0	0	0	0	1	1	0	34160052	1	1	2	3	34160052	341600	0
3416035212	4	0	3	0	0	0	26.7	0	1	2	1	1	0	0	0	0	0	1	1	0	34160052	0	1	2	3	34160052	341600	0
3416035213	4	0	3	0	0	0	30.4	0	1	2	1	1	0	0	0	0	0	1	1	1	34160052	0	1	2	3	34160052	341600	0
3416035214	4	0	3	0	1	0	29.4	0	1	5	1	0	0	1	0	0	0	1	1	1	34160052	1	3	2	3	34160052	341600	0
3416005301	4	1	2	1	0	1	31.8	0	1	6	0	0	0	0	0	0	1	1	1	0	34160053	0	3	3	1	34160053	341600	0
3416005302	4	1	3	1	1	1	24.8	0	1	5	1	0	0	1	0	0	1	1	1	0	34160053	0	3	2	1	34160053	341600	0
3416005303	4	1	3	1	0	1	32.3	0	1	1	1	1	0	0	0	0	0	1	1	0	34160053	0	1	2	3	34160053	341600	0
3416005304	4	1	2	1	1	1	30	0	1	2	0	0	0	0	0	0	0	1	0	0	34160053	1	1	2	3	34160053	341600	0
3416005305	4	1	2	1	1	1	21.4	0	1	2	1	0	0	0	0	0	0	1	0	1	34160053	1	1	2	3	34160053	341600	0
3416005306	4	1	2	1	1	1	23.7	0	1	3	1	0	0	0	0	0	1	1	0	0	34160053	1	2	2	1	34160053	341600	0
3416005307	4	1	1	1	0	1	24.9	0	1	5	0	0	0	0	0	0	1	0	1	0	34160053	0	3	2	1	34160053	341600	0
3416005309	4	1	2	1	1	1	26.4	0	1	1	0	1	1	0	0	0	0	1	0	0	34160053	0	1	1	3	34160053	341600	0
3416005310	4	1	2	0	0	1	29.5	0	1	2	1	1	0	0	0	0	0	1	1	0	34160053	1	1	3	3	34160053	341600	0
3416005311	4	1	2	0	0	1	33.8	0	1	4	1	0	1	0	0	0	1	1	1	0	34160053	0	2	1	1	34160053	341600	0
3416005312	4	1	3	0	1	1	25.8	0	1	6	0	0	0	0	0	0	1	1	0	0	34160053	0	3	3	1	34160053	341600	0
3416005313	4	1	2	1	1	1	22.4	0	1	2	0	1	1	0	0	0	0	1	0	0	34160053	1	1	1	3	34160053	341600	0
3416005314	4	1	2	1	0	1	31.8	0	1	4	1	1	0	1	0	0	1	1	1	0	34160053	0	2	3	1	34160053	341600	0
3416005315	4	1	2	1	0	1	34.8	0	1	4	0	0	1	0	0	0	1	0	0	0	34160053	0	2	1	1	34160053	341600	0	-.43	-3.55	-2.44
3416035301	4	0	1	1	1	0	25.4	0	1	3	0	0	1	0	0	0	1	1	1	0	34160053	0	2	1	1	34160053	341600	0	-1.65	-1.87	-2.12
3416035302	4	0	1	1	1	1	26	0	1	2	1	1	0	0	0	0	0	1	1	0	34160053	0	1	3	3	34160053	341600	0	.14	-2.86	-1.65
3416035303	4	0	3	1	1	1	23.5	0	1	1	1	1	0	0	0	0	0	1	1	0	34160053	0	1	3	3	34160053	341600	0	.14	-2.27	-1.13
3416035304	4	0	3	1	0	1	27.6	0	1	6	1	0	0	0	0	0	0	1	1	0	34160053	0	3	3	3	34160053	341600	0	-1.65	.14	-1.01
3416035305	4	0	3	0	1	0	23.8	0	1	4	1	0	0	0	0	0	0	0	1	0	34160053	0	2	3	3	34160053	341600	0	-.29	-1.32	-.85
3416035306	4	0	2	0	1	1	25.2	0	1	4	1	0	0	0	0	0	0	1	1	0	34160053	1	2	2	3	34160053	341600	0	1.87	-3	-.72
3416035307	4	0	3	0	1	1	27.8	0	1	2	1	1	0	0	0	0	0	0	1	0	34160053	0	1	3	3	34160053	341600	0	1.04	-1.43	-.42
3416035308	4	0	2	0	1	1	25.6	0	1	2	1	1	0	0	0	0	0	1	1	0	34160053	1	1	3	3	34160053	341600	0	-.33	-.3	-.39
3416035309	4	0	1	0	1	0	26.5	0	1	5	1	0	0	0	0	0	1	1	1	0	34160053	0	3	3	1	34160053	341600	0	.93	-1.81	-.13
3416035310	4	0	3	0	1	1	27.2	0	1	3	1	0	1	1	0	0	0	0	1	0	34160053	0	2	1	3	34160053	341600	0	1.49	-1.48	-.08
3416035311	4	0	3	0	1	1	22.8	0	1	2	0	0	1	0	0	0	0	1	0	0	34160053	0	1	1	3	34160053	341600	0	.23	-.2	.01
3416035312	4	0	1	0	1	1	26.8	0	1	6	0	0	1	0	0	0	0	0	1	0	34160053	0	3	1	3	34160053	341600	0	-.46	.7	.06
3416035313	4	0	2	0	0	0	34.4	0	1	6	1	0	0	0	0	0	0	1	1	0	34160053	0	3	3	3	34160053	341600	0	.26	-.08	.14
3416005401	4	1	1	0	1	1	35.6	0	1	5	0	0	0	0	0	0	1	1	1	0	34160054	0	3	2	1	34160054	341600	0	.13	2.1	1.39
3416005402	4	1	2	0	0	1	35.7	0	1	6	1	0	0	0	0	0	1	1	0	0	34160054	0	3	2	1	34160054	341600	0	2.25	0	1.71
3416005403	4	1	3	0	1	1	27.6	0	1	6	0	0	0	0	0	0	1	1	0	0	34160054	0	3	2	1	34160054	341600	0	-.19	-2.21	-1.34
3416005404	4	1	2	0	1	1	25.3	0	1	2	1	1	1	1	0	0	0	1	0	0	34160054	1	1	1	3	34160054	341600	0	0	-2.25	-1.28
3416005405	4	1	2	1	1	1	29.9	1	1	4	1	0	0	0	0	0	1	1	0	0	34160054	1	2	2	1	34160054	341600	0	1.38	-3.88	-1.25
3416005406	4	1	3	1	1	1	24.2	0	1	3	0	0	0	0	1	1	0	1	1	0	34160054	1	2	2	3	34160054	341600	0	-1.44	-.29	-1.24
3416005407	4	1	2	0	0	1	31.9	0	1	4	0	0	0	0	0	0	1	1	1	0	34160054	0	2	2	1	34160054	341600	0	-.03	-.85	-.45
3416005408	4	1	2	1	0	1	37.6	0	1	2	1	1	0	0	0	0	0	1	1	0	34160054	0	1	2	3	34160054	341600	0	.18	-1.02	-.35
3416005409	4	1	3	1	1	1	36.7	0	1	5	1	0	0	0	0	0	1	1	0	0	34160054	0	3	2	1	34160054	341600	0	-.99	.95	-.3
3416005410	4	1	3	0	1	1	26.3	0	1	2	0	1	1	0	0	0	0	1	0	0	34160054	0	1	1	3	34160054	341600	0	-.92	1.35	.05
3416005411	4	1	2	0	0	1	33.4	0	1	4	1	0	0	0	0	0	1	1	0	0	34160054	0	2	2	1	34160054	341600	0	1.68	-1.92	.13
3416005412	4	1	3	0	0	1	32.8	0	1	1	0	1	0	0	0	0	0	1	1	0	34160054	0	1	2	3	34160054	341600	0	.85	-.75	.24
3416005413	4	1	2	0	1	1	28.8	0	1	2	0	1	0	0	0	0	0	1	0	0	34160054	0	1	3	3	34160054	341600	0	1.14	-.42	.67
3416005414	4	1	3	1	1	1	29.4	0	1	2	1	1	1	0	0	0	0	1	0	0	34160054	0	1	1	3	34160054	341600	0	.3	.9	.71
3416005415	4	1	2	0	0	1	30.6	0	1	2	1	1	1	0	0	1	0	1	1	0	34160054	0	1	1	3	34160054	341600	0	1.77	-.76	.88
3416005416	4	1	1	1	1	1	28	0	1	3	0	0	0	0	0	0	1	1	0	0	34160054	0	2	2	1	34160054	341600	0	1.82	-.45	1.09
3416035401	4	0	3	1	1	0	22.4	1	1	4	1	0	0	0	1	1	0	1	1	0	34160054	1	2	2	3	34160054	341600	0	3.9	-1.02	2.14
3416035402	4	0	2	0	0	1	27.7	0	1	2	1	1	0	0	0	0	0	1	1	0	34160054	1	1	2	3	34160054	341600	0	2.5	.98	2.26
3416035403	4	0	2	1	1	1	23.7	0	1	2	0	1	0	0	0	0	0	1	1	0	34160054	0	1	2	3	34160054	341600	0	-2.34	-1.29	-2.3
3416035404	4	0	2	1	1	0	24	0	1	2	0	1	0	0	0	0	0	1	1	0	34160054	0	1	2	3	34160054	341600	0	-1.28	-1.77	-1.77
3416035405	4	0	3	0	1	1	26.5	0	1	4	0	0	0	0	0	0	0	1	0	0	34160054	1	2	2	3	34160054	341600	0	-2.41	-.07	-1.75
3416035406	4	0	3	0	1	1	25.5	0	1	4	0	0	0	0	0	0	0	1	1	1	34160054	0	2	2	3	34160054	341600	0	-1.6	-.99	-1.7
3416035407	4	0	3	0	1	1	26.2	0	1	6	1	0	0	1	1	0	0	1	1	0	34160054	1	3	2	3	34160054	341600	0	-1.18	-1.45	-1.63
3416035408	4	0	1	1	1	1	23.8	0	1	6	0	0	0	0	0	0	0	1	1	0	34160054	0	3	2	3	34160054	341600	0	-.51	-2.06	-1.54
3416035409	4	0	2	0	1	0	28.1	0	1	5	0	0	0	0	0	0	0	0	1	0	34160054	0	3	2	3	34160054	341600	0	-1.31	-.59	-1.22
3416035410	4	0	3	0	0	1	32.4	0	1	3	1	1	0	0	0	0	0	1	0	1	34160054	1	2	2	3	34160054	341600	0	-1.19	-.74	-1.21
3416035412	4	0	1	0	1	0	24.7	0	1	2	0	1	0	0	0	0	0	1	0	1	34160054	1	1	2	3	34160054	341600	0	-.99	-.38	-.84
3416035413	4	0	2	1	0	1	29.8	0	1	4	1	0	0	1	0	0	0	1	1	0	34160054	0	2	2	3	34160054	341600	0	.41	-2.06	-.71
3416035414	4	0	2	1	1	1	23.4	0	1	2	0	1	0	0	1	0	0	1	0	0	34160054	1	1	2	3	34160054	341600	0	-.93	.44	-.51
3416035415	4	0	2	1	1	1	26.5	0	1	5	0	0	0	0	0	0	0	1	1	0	34160054	0	3	2	3	34160054	341600	0	-.44	-.37	-.49
3416035416	4	0	3	1	1	1	24.5	0	1	2	0	0	0	1	1	0	0	1	1	0	34160054	0	1	2	3	34160054	341600	0	.04	-1	-.42
3416035417	4	0	2	1	1	1	25	0	1	2	0	1	0				0	1	1	0	34160054	1	1	2	3	34160054	341600	0	.44	-1.13	-.33
3416035418	4	0	2	0	1	1	25.4	0	1	3	0	0	0	0	0	0	0	1	1	0	34160054	0	2	2	3	34160054	341600	0	-.29	-.15	-.28
3416035419	4	0	2	0	0	1	31.3	0	1	2	1	1	0	1	0	0	0	0	1	0	34160054	0	1	2		34160054	341600	0	.02	.07	.02
3416035420	4	0	3	0	1	1	24.2	0	1	2	0	1	0	0	0	0	0	1	1	1	34160054	1	1	2	3	34160054	341600	0	-2.99	-2.81	-3.44
3416035421	4	0	1	0	0	1	24.4	0	1	2	1	1	0	0	0	0	0	1	1	0	34160054	1	1	2	3	34160054	341600	0	-3.26	-1.69	-3.12
3416035422	4	0	1	0	0	0	32.2	0	1	4	1	0	0	1	1	0	0	1	1	0	34160054	0	2	2	3	34160054	341600	0	-3.29	-.27	-2.47
3445001101	4	1	3	1	1	1	26	0	1	4	1	0	1	0	0	0	1	1	1	1	34450011	0	2	1	1	34450011	344500	0	-2.61	-.83	-2.4
3445001101	4	0	2	0	0	1	28.7	0	1	1	1	1	0	0	0	0	0	1	1	0	34450011	0	1	2		34450011	344500	0	-2.09	-.07	-1.6
3445001102	4	1	3	0	1	1	25.7	0	1	6	1	0	1	0	1	1	1	1	1	0	34450011	1	3	1	1	34450011	344500	0	-1.24	-1.08	-1.59
3445001102	4	0	3	0	1	0	25.1	0	1	2	1	1	1	0	0	0	0	1	1	0	34450011	0	1	1	3	34450011	344500	0	-2.23	.04	-1.51
3445001103	4	1	2	0	0	1	26.9	0	1	1	1	1	1	0	0	0	0	1	1	0	34450011	0	1	1	3	34450011	344500	0	-1.95	.37	-1.2
3445001103	4	0	3	0	1	0	25.8	0	1	6	0	0	0	0	0	0	0	1	1	0	34450011	0	3	3	3	34450011	344500	0	-4.88	3.76	-1.2
3445001104	4	1	3	0	0	1	26.8	0	1	1	1	1	1	0	0	0	0	1	1	0	34450011	0	1	1	2	34450011	344500	0	-.74	-.51	-.91
3445001104	4	0	3	1	1	1	23.1	0	1	3	0	0	0	0	0	0	0	1	1	0	34450011	1	2	3	3	34450011	344500	0	-1.72	.88	-.88
3445001105	4	1	3	1	1	1	21.3	0	1	1	0	0	0	0	1	1	0	1	1	0	34450011	0	1	3	2	34450011	344500	0	-.25	-.95	-.63
3445001105	4	0	3	0	1	1	22.1	0	1	1	0	1	1	0	0	0	0	1	1	0	34450011	0	1	1	3	34450011	344500	0	-1.96	1.02	-.53
3445001106	4	1	2	0	0	1	26.5	0	1	1	1	1	1	0	0	0	0	1	1	0	34450011	0	1	1	3	34450011	344500	0	-.62	0	-.43
3445001106	4	0	3	0	1	0	23.5	0	1	5	0	0	0	0	1	0	1	1	1	0	34450011	0	3	3	1	34450011	344500	0	-1.6	2.03	-.22
3445001107	4	1	3	1	0	1	27.6	0	1	3	1	0	0	0	0	0	1	1	1	0	34450011	1	2	3	1	34450011	344500	0	.72	-.37	.22
3445001107	4	0	3	1	1	1	24.1	0	1	3	0	1	0	0	0	0	0	1	1	1	34450011	1	2	3	3	34450011	344500	0	-1.76	-1.43	-1.98
3445001108	4	1	3	1	1	1	24	0	1	1	1	1	0	0	0	0	0	1	1	0	34450011	0	1	3	2	34450011	344500	0	-2	-.76	-1.84
3445001108	4	0	2	1	1	1	24.9	0	1	2	0	1	1	0	0	0	0	1	1	0	34450011	0	1	1	3	34450011	344500	0		2.8	-1.7
3445001109	4	1	2	0	1	1	24	0	1	1	0	1	0	0	0	0	0	1	1	0	34450011	0	1	3	2	34450011	344500	0	-1.58	-.48	-1.46
3445001109	4	0	3	1	1	0	24.2	0	1	4	0	0	1	0	0	0	0	1	1	0	34450011	0	2	1	3	34450011	344500	0	-.31	-2.21	-1.26
3445001110	4	1	3	0	1	1	30.7	0	1	1	1	1	0	0	0	0	0	0	1	0	34450011	1	1	3	2	34450011	344500	0	-.61	-1.38	-1.23
3445001110	4	0	1	0	0	0	28.4	0	1	5	1	0	0	0	0	0	0	1	1	0	34450011	0	3	3	3	34450011	344500	0	-.75	-1.26	-1.15
3445001111	4	1	3	0	1	1	31.3	0	1	4	0	0	0	0	0	0	1	1	0	0	34450011	0	2	3	1	34450011	344500	0	.3	-2.04	-.83
3445001111	4	0	3	1	1	1	23.7	0	1	5	1	0	0	0	0	0	0	1	1	0	34450011	0	3	3	3	34450011	344500	0	-.95	-.19	-.82
3445001112	4	1	3	1	1	1	24.5	0	1	3	1	1	1	0	0	0	0	1	1	0	34450011	0	2	1	3	34450011	344500	0	-1.06	-.08	-.79
3445001112	4	0	2	1	0	0	29.8	0	1	6	1	0	0	0	0	0	0	1	1	1	34450011	0	3	3	3	34450011	344500	0	-.35	-.52	-.52
3445001113	4	1	3	0	1	1	24.5	0	1	6	1	0	0	0	0	0	1	1	1	0	34450011	0	3	3	1	34450011	344500	0	.01	-.53	-.26
3445001113	4	0	1	0	1	1	22.2	0	1	2	0	1	0	0	0	0	0	1	1	0	34450011	1	1	3	3	34450011	344500	0	1	-1.34	-.17
3445001114	4	1	3	0	0	1	30.1	0	1	3	1	0	1	0	0	0	1	1	1	0	34450011	0	2	1	1	34450011	344500	0	.05	.01	.01
3445001115	4	1	3	0	1	1	24.9	0	1	3	0	0	0	0	0	0	1	1	0	0	34450011	0	2	3	1	34450011	344500	0	-.15	.51	.1
3445001116	4	1	3	0	0	1	27.5	0	1	4	1	0	0	0	0	0	1	1	0	0	34450011	1	2	2	1	34450011	344500	0	.5	.6	.64
3445001201	4	1	3	1	1	1	26.3	0	1	6	0	0	0	0	0	0	1	1	1	0	34450012	0	3	3	1	34450012	344500	0		3.86	-3
3445001201	4	0	1	1	1	1	32.1	0	1	3	1	0	0	1	1	0	1	1	0	1	34450012	1	2	2	1	34450012	344500	0	-2.99	1.28	-1.56
3445001202	4	1	2	1	1	1	25.8	1	1	4	0	0	0	0	0	0	0	1	0	0	34450012	0	2	3	3	34450012	344500	0	-.68	-2	-1.52
3445001203	4	1	3	0	1	1	25	0	1	4	1	0	0	0	0	0	1	0	1	0	34450012	0	2	3	1	34450012	344500	0	.27	-2.47	-1
3445001203	4	0	2	1	1	0	23.1	0	1	3	1	0	0	0	0	0	0	0	1	0	34450012	1	2	2	3	34450012	344500	0	-1.51	.36	-.97
3445001204	4	1	3	1	1	1	21.3	0	1	1	0	1	1	0	0	0	0	1	1	0	34450012	0	1	1	2	34450012	344500	0	-.39	-1.24	-.94
3445001204	4	0	2	0	0	1	30.3	0	1	2	1	0	0	0	0	0	0	1	1	0	34450012	0	1	2	3	34450012	344500	0	-1.16	.1	-.85
3445001205	4	1	3	0	1	1	25.5	0	1	4	0	0	1	0	0	0	1	1	0	0	34450012	0	2	1	1	34450012	344500	0	.02	-1.45	-.71
3445001205	4	0	3	0	0	1	27.5	0	1	1	1	1	0	0	0	0	0	1	1	0	34450012	0	1	2	3	34450012	344500	0	-1.18	.43	-.66
3445001206	4	1	3	1	1	1	23.6	0	1	6	1	0	0	0	0	0	1	1	1	0	34450012	1	3	3	1	34450012	344500	0	-1.15	.49	-.66
3445001206	4	0	3	0	1	0	26.3	0	1	3	1	0	0	1	1	1	0	1	1	0	34450012	0	2	2	3	34450012	344500	0	.14	-1.14	-.49
3445001207	4	1	3	0	1	1	23.7	0	1	6	1	0	0	0	0	0	1	1	1	0	34450012	0	3	3	1	34450012	344500	0	-2.52	2.5	-.46
3445001207	4	0	3	0	1	1	24.3	0	1	1	1	1	0	0	0	0	0	1	1	0	34450012	0	1	2	3	34450012	344500	0	-1.24	.82	-.44
3445001208	4	0	2	0	0	0	30.9	0	1	1	1	1	0	0	0	0	0	1	1	0	34450012	1	1	2	3	34450012	344500	0	.66	-.85	-.07
3445001209	4	1	2	1	0	1	22.1	1	1	3	0	0	0	0	0	0	1	1	1	0	34450012	1	2	3	1	34450012	344500	0	.14	2.1	.96
3445001209	4	0	2	0	1	1	26.8	0	1	5	0	0	0	0	1	0	0	1	1	1	34450012	0	3	2	2	34450012	344500	0		-2.94	3.45
3445001210	4	0	3	1	1	0	22.6	0	1	3	1	0	0	0	0	0	0	1	0	1	34450012	0	2	2	3	34450012	344500	0	-2.66	-1.59	-2.7
3445001211	4	1	3	1	1	1	23.3	0	1	2	1	0	1	0	0	0	1	1	1	0	34450012	0	1	1	1	34450012	344500	0	-1.15	-2.18	-2.23
3445001211	4	0	3	0	1	0	26.1	0	1	6	1	0	0	0	0	0	0	0	1	0	34450012	0	3	2	3	34450012	344500	0	-1.91	-1.42	-2.06
3445001212	4	1	2	0	1	1	25.8	0	1	2	0	0	0	0	0	0	0	1	1	0	34450012	0	1	3	3	34450012	344500	0	-2.13	-.74	-1.98
3445001212	4	0	1	1	1	1	22.9	0	1	2	0	0	0	0	0	0	0	1	1	0	34450012	0	1	2	3	34450012	344500	0	-2.19	-.12	-1.67
3445001213	4	1	3	1	0	1	31.6	0	1	4	1	0	0	0	0	0	1	1	1	0	34450012	1	2	3	1	34450012	344500	0	-1.28	-1	-1.47
3445001213	4	0	3	0	1	0	22.2	0	1	4	1	1	0	1	1	0	0	1	1	0	34450012	1	2	2	3	34450012	344500	0	-2.45	.65	-1.43
3445001214	4	1	3	0	0	1	30.5	0	1	4	1	0	0	0	0	0	1	1	1	0	34450012	0	2	3	1	34450012	344500	0	-1.54	-.42	-1.31
3445001214	4	0	2	1	1	0	21.7	0	1	3	1	0	0	1	1	1	0	1	1	0	34450012	0	2	2	3	34450012	344500	0	-1.67	.02	-1.22
3445001215	4	0	3	1	1	1	25.3	0	1	3	0	0	0	0	0	0	0	1	1	0	34450012	0	2	2	3	34450012	344500	0	-1.69	.25	-1.16
3445001216	4	1	3	0	1	1	18.7	0	1	1	1	1	0	0	0	0	0	1	1	0	34450012	0	1	3	3	34450012	344500	0	-.9	-.82	-1.09
3445001301	4	1	3	0	0	1	33.5	0	1	2	1	0	0	0	0		0	1	1	0	34450013	0	1	2	3	34450013	344500	0	-.96	-.51	-1.01
3445001301	4	0	3	1	1	1	22.9	0	1	4	0	0	0	1	0	0	1	1	1	0	34450013	0	2	3	1	34450013	344500	0	-.51	-1.09	-.91
3445001302	4	1	3	0	1	1	23.4	0	1	6	1	0	0	0	1	1	1	1	0	1	34450013	0	3	2	1	34450013	344500	0	-.61	-.33	-.59
3445001302	4	0	3	0	1	1	26.2	0	1	2	1	1	1	0	1	1	0	1	1	0	34450013	0	1	1	3	34450013	344500	0	-.92	.76	-.36
3445001303	4	1	3	1	1	1	24.7	0	1	4	0	0	0	0	0	0	1	1	1	0	34450013	0	2	2	1	34450013	344500	0	.37	-.7	-.07
3445001303	4	0	2	1	1	1	22	0	1	2	0	1	0	0	0	0	0	1	1	0	34450013	1	1	3	3	34450013	344500	0	-2.75	-1.76	-2.97
3445001304	4	1	3	0	0	1	29.2	0	1	6	1	0	0	0	0	0	1	1	1	0	34450013	0	3	2	1	34450013	344500	0	-1.95	-2.61	-2.74
3445001304	4	0	3	0	1	1	21.8	0	1	1	0	1	0	1	1	0	0	1	1	0	34450013	0	1	3	3	34450013	344500	0	-1.49	-2.64	-2.7
3445001305	4	1	3	0	1	1	29.1	0	1	2	0	1	0	0	0	0	0	1	1	0	34450013	0	1	2	3	34450013	344500	0	-4.35	1.75	-2.24
3445001305	4	0	3	0	1	0	24.6	0	1	6	0	0	1	0	0	0	0	1	1	0	34450013	0	3	1	3	34450013	344500	0	-2.14	-1.1	-2.03
3445001306	4	1	3	0	0	1	30.3	0	1	3	0	0	0	0	0	0	1	1	1	0	34450013	0	2	2	1	34450013	344500	0	-1.56	-1.6	-1.89
3445001306	4	0	3	1	1	1	25.1	0	1	1	0	1	1	0	0	0	0	1	1	0	34450013	0	1	1	3	34450013	344500	0	-2.81	.68	-1.7
3445001307	4	0	3	1	1	0	23.6	0	1	3	1	0	0	0	1	0	0	0	1	0	34450013	0	2	3	3	34450013	344500	0	-.8	-1.82	-1.52
3445001308	4	1	2	0	1	1	27.3	0	1	5	1	0	0	0	0	0	1	1	1	1	34450013	0	3	2	1	34450013	344500	0	-1.14	-1.17	-1.36
3445001308	4	0	3	0	1	1	21.8	0	1	2	1	1	1	0	0	0	0	1	1	0	34450013	1	1	1	3	34450013	344500	0	-1.09	-.47	-1.01
3445001309	4	1	3	0	1	1	25.7	0	1	5	1	0	0	0	0	0	1	1	0	0	34450013	0	3	2	1	34450013	344500	0	-.02	-1.65	-.89
3445001309	4	0	2	0	0	0	28.9	0	1	5	1	0	0	0	0	0	1	1	1	1	34450013	0	3	3	1	34450013	344500	0	-.8	-.19	-.74
3445001310	4	1	3	1	0	0	28.8	0	1	3	0	0	0	0	0	0	1	1	1	0	34450013	0	2	2	1	34450013	344500	0	-2.24	1.66	-.12
3445001310	4	0	3	1	1	1	23.3	0	1	2	1	1	1	0	0	0	0	1	1	1	34450013	0	1	1	3	34450013	344500	0	-.26	.31	-.04
3445001311	4	1	3	1	1	1	21.4	0	1	2	1	1	0	0	0	0	0	1	1	0	34450013	0	1	2	3	34450013	344500	0	-1.27	1.29	.04
3445001312	4	1	2	0	0	1	32.8	0	1	1	1	1	0	0	0	0	0	1	0	0	34450013	0	1	2	2	34450013	344500	0	.8	.27	.69
3445001312	4	0	2	0	1	0	23.8	0	1	3	1	0	0	0	0	0	0	1	1	1	34450013	0	2	3	3	34450013	344500	0	-1.95	-.88	-1.82
3445001313	4	1	3	1	1	1	22.2	1	1	2	1	1	0	0	0	0	0	1	1	0	34450013	0	1	2	3	34450013	344500	0	-1.97	-.82	-1.8
3445001313	4	0	3	1	1	1	23.2	0	1	1	1	1	0	0	0	0	0	1	1	0	34450013	0	1	3	3	34450013	344500	0	-1.66	-1.19	-1.75
3445001314	4	1	3	0	1	1	28.3	0	1	6	1	0	0	1	1	0	1	1	1	0	34450013	0	3	2	1	34450013	344500	0	-1.35	-.98	-1.62
3445001314	4	0	2	0	0	0	31.3	0	1	6	1	0	0	1	0	0	0	1	1	1	34450013	1	3	3	3	34450013	344500	0	-1.98	.07	-1.46
3445001315	4	1	3	0	1	1	22.4	0	1	2	1	1	0	0	0	0	0	1	1	0	34450013	0	1	2	3	34450013	344500	0	-1.43	.12	-1.04
3445001315	4	0	3	0	1	0	22.8	0	1	2	0	1	0	0	0	0	0	0	1	0	34450013	0	1	2	3	34450013	344500	0	-.98	-.23	-.82
3445001316	4	1	3	1	1	1	23.4	0	1	6	1	0	0	0	0	0	1	1	1	0	34450013	0	3	2	1	34450013	344500	0	-1.99	1.05	-.72
3445001316	4	0	1	1	1	1	23.3	0	1	2	1	1	0	0	0	0	0	1	1	0	34450013	0	1	2	3	34450013	344500	0	-2.59	1.9	-.66
3445001317	4	0	2	1	1	1	25.4	0	1	3	0	1	0	1	0	0	0	1	1	0	34450013	0	2	2	3	34450013	344500	0	-.09	-.71	-.43
3445001318	4	0	3	0	0	1	28.8	0	1	3	1	1	0	1	1	0	1	0	1	0	34450013	0	2	2	1	34450013	344500	0	.43	-1.43	-.32
3445001319	4	0	2	0	0	0	29.1	0	1	3	0	0	1	0	0	0	0	0	1	0	34450013	0	2	1	3	34450013	344500	0	-.22	.77	.16
3445001320	4	0	3	0	1	0	29.6	0	1	2	1	0	0	0	0	0	0	0	1	1	34450013	0	1	2	3	34450013	344500	0	-1.99	2.43	.24
3445001321	4	0	3	0	1	0	23	0	1	4	1	0	0	0	0	0	1	0	1	1	34450013	0	2	2	1	34450013	344500	0	1.34	-.17	.89
3445001321	4	0	3	0	0	1	29.3	0	1	2	1	0	0	0	0	1	0	0	1	0	34450013	0	1	3	3	34450013	344500	0	-.19	1.96	1.32
3445001322	4	0	3	0	1	0	22.8	0	1	4	1	0	0	1	1	0	1	1	1	0	34450013	0	2	3	1	34450013	344500	0	1.05	1.36	1.57
3445001323	4	0	3	0	1	0	23	0	1	2	1	1	1	0	0	0	0	1	1	1	34450013	0	1	1	3	34450013	344500	0	-1.82	-3.05	-3.45
3445001401	4	1	3	0	0	1	29.8	0	1	4	1	0	0	0	0	0	1	1	1	0	34450014	1	2	2	1	34450014	344500	0	-3.26	-.72	-2.77
3445001401	4	0	3	0	1	1	25.9	0	1	3	1	1	0	0	0	0	0	1	0	0	34450014	0	2	2	3	34450014	344500	0	-2.55	-.44	-2.14
3445001402	4	1	3	0	0	1	33.3	0	1	3	1	0	0	0	1		1	1	1	0	34450014	1	2	3	1	34450014	344500	0	-2.19	-.63	-1.85
3445001402	4	0	3	0	1	0	26.5	0	1	3	1	0	0	0	1	0	1	1	0	0	34450014	0	2	2	1	34450014	344500	0	-.58	-1.12	-1.15
3445001403	4	1	3	1	1	1	22.5	0	1	3	1	0	0	0	0	0	1	1	1	0	34450014	0	2	2	1	34450014	344500	0	-.81	-.79	-1.08
3445001403	4	0	3	1	1	0	21.3	0	1	1	0	1	0	0	0	0	0	1	1	0	34450014	1	1	2	3	34450014	344500	0	-.5	-1.09	-.88
3445001404	4	1	3	1	1	1	24.8	0	1	6	1	0	0	0	1	1	1	1	1	0	34450014	0	3	2	1	34450014	344500	0	-.94	-.09	-.72
3445001404	4	0	3	0	1	0	22.3	0	1	2	1	1	0	1	0	0	0	1	1	0	34450014	1	1	2	3	34450014	344500	0	-1	.05	-.65
3445001405	4	1	3	0	1	0	22.8	0	1	3	1	0	0	0	0	0	1	1	1	0	34450014	0	2	2	1	34450014	344500	0	-.01	-.47	-.23
3445001405	4	0	3	0	0	0	30.8	0	1	3	1	0	0	0	0	0	0	0	1	0	34450014	1	2	2	3	34450014	344500	0	-.21	.43	.03
3445001406	4	1	3	1	0	1	29.8	0	1	1	1	1	0	0	0	0	0	1	1	0	34450014	0	1	3	3	34450014	344500	0	-.46	1.23	.29
3445001406	4	0	2	0	1	0	22.5	0	1	2	1	1	0	1	1	0	0	1	1	0	34450014	1	1	2	3	34450014	344500	0	1.89	-2.17	.31
3445001407	4	1	2	1	0	0	31.8	0	1	4	0	0	1	0	0	0	1	1	1	0	34450014	1	2	1	1	34450014	344500	0	1.31	-.59	.65
3445001408	4	1	3	1	1	1	25	0	1	6	0	0	0	0	0	0	1	1	1	0	34450014	0	3	2	1	34450014	344500	0	2.48	-.52	1.6
3445001408	4	0	3	0	1	1	21.9	0	1	2	1	1	0	0	0	0	0	1	1	0	34450014	0	1	2	3	34450014	344500	0	3.88	.21	3.18
3445001409	4	0	3	0	1	1	23.1	0	1	2	1	0	0	1	0	0	0	1	1	0	34450014	0	1	2	3	34450014	344500	0	-3.57	.36	-2.45
3445001410	4	1	3	0	1	1	23.6	0	1	3	1	0	0	0	0	0	0	1	1	0	34450014	0	2	3	3	34450014	344500	0	-.82	-1.53	-1.49
3445001411	4	1	3	0	1	1	21.3	0	1	2	1	1	0	0	0	0	0	1	1	0	34450014	1	1	3	3	34450014	344500	0	-1.05	-1.16	-1.35
3445001411	4	0	3	0	1	0	25.8	0	1	4	1	0	0	0	0	0	0	1	1	0	34450014	0	2	2	3	34450014	344500	0	-.31	-1.61	-1.07
3445001412	4	1	3	0	0	1	29.1	0	1	3	0	0	0	0	0	1	1	1	1	0	34450014	0	2	2	1	34450014	344500	0	-.02	-1.58	-1.03
3445001412	4	0	3	1	1	1	24.4	0	1	5	0	0	0	0	0	0	0	1	1	0	34450014	1	3	2	3	34450014	344500	0	-1.09	0	-.81
3445001413	4	1	3	1	1	1	22.8	0	1	2	0	0	0	0	0	0	0	1	1	0	34450014	0	1	2	3	34450014	344500	0	.21	-1.02	-.36
3445001413	4	0	3	0	1	0	25.8	0	1	3	1	0	0	1	0	0	1	1	1	0	34450014	1	2	2	1	34450014	344500	0	-.26	.4	0
3445001414	4	1	3	1	1	1	23.2	0	1	3	0	0	0	0	0	0	1	1	1	0	34450014	0	2	2	1	34450014	344500	0	1.47	-1.74	.18
3445001415	4	1	3	0	0	1	29.8	0	1	4	1	0	0	0	0	0	1	1	1	0	34450014	0	2	2	1	34450014	344500	0	-1.81	3.12	.2
3445001416	4	1	3	1	1	1	24.8	0	1	4	1	0	0	1	0	0	1	1	0	0	34450014	1	2	2	1	34450014	344500	0	.43	.05	.3
3445002101	4	1	3	1	1	1	27.8	0	1	2	1	0	1	0	0	0	0	1	1	0	34450021	1	1	1	3	34450021	344500	0	.9	-.58	.34
3445002101	4	0	2	0	0	0	27.4	0	1	2	0	1	0	0	0	0	0	1	1	0	34450021	1	1	2	3	34450021	344500	0	1.88	-.55	1.17
3445002102	4	1	3	0	1	1	19.6	0	1	1	0	1	0	0	0	0	0	1	1	0	34450021	0	1	3	2	34450021	344500	0	1.93	.11	1.49
3445002102	4	0	2	1	1	1	24	0	1	6	1	0	0	1	1	0	0	1	1	0	34450021	0	3	2	3	34450021	344500	0	-3.06	-3.59	-3.83
3445002103	4	1	3	1	1	1	27.4	0	1	5	1	0	0	0	0	0	1	1	0	0	34450021	0	3	3	1	34450021	344500	0	-1.85	-1.91	-2.32
3445002103	4	0	2	0	1	1	22.1	0	1	1	1	1	0	0	0	0	0	1	0	0	34450021	1	1	2	3	34450021	344500	0	-1.84	-1.91	-2.32
3445002104	4	1	2	0	0	1	27.6	0	1	4	0	0	1	0	0	0	1	1	1	0	34450021	0	2	1	1	34450021	344500	0	-2.44	-1.05	-2.15
3445002104	4	0	3	1	0	0	33.1	0	1	6	0	0	0	0	0	0	0	1	0	0	34450021	0	3	2	3	34450021	344500	0	-1.71	-1.11	-1.8
3445002105	4	1	2	1	1	1	23.8	0	1	2	0	1	1	0	0	0	0	1	1	0	34450021	0	1	1	3	34450021	344500	0	-.99	-2.02	-1.71
3445002105	4	0	3	0	1	1	25.7	0	1	5	1	0	0	0	0	0	0	1	1	0	34450021	0	3	2	3	34450021	344500	0	-1.67	.06	-1.21
3445002106	4	1	3	0	1	1	23.7	1	1	6	0	0	0	1	0	0	1	1	1	0	34450021	1	3	3	1	34450021	344500	0	-.48	-1.25	-1.04
3445002106	4	0	3	1	1	1	23.7	0	1	2	1	1	0	0	0	0	0	0	1	0	34450021	0	1	2	3	34450021	344500	0	-1.79	.5	-.99
3445002107	4	1	2	0	0	1	29.5	0	1	2	1	1	1	0	0	0	0	1	1	0	34450021	0	1	1	3	34450021	344500	0	-1.71	1.17	-.71
3445002107	4	0	2	0	0	1	28.5	0	1	5	1	1	0	0	1	1	0	1	1	0	34450021	0	3	2	3	34450021	344500	0	.04	-.82	-.64
3445002108	4	1	1	0	0	1	30.1	0	1	5	1	0	0	0	0	0	1	1	1	0	34450021	0	3	3	1	34450021	344500	0	-.24	-.21	-.23
3445002108	4	0	3	0	0	1	28.9	0	1	3	0	1	0	1	0	0	0	1	1	0	34450021	0	2	2	3	34450021	344500	0	-.51	.44	-.11
3445002109	4	1	2	0	0	1	38.1	0	1	3	0	0	1	0	0	0	1	1	0	0	34450021	1	2	1	1	34450021	344500	0	.05	-.18	-.03
3445002109	4	0	3	0	1	1	23.9	0	1	3	0	0	0	1	1	0	0	1	1	0	34450021	0	2	2	3	34450021	344500	0	.92	-.55	.32
3445002110	4	1	2	1	0	1	28.4	0	1	2	1	0	1	0	0	0	1	1	1	0	34450021	0	1	1	1	34450021	344500	0	-3.78	-3.14	-4.07
3445002110	4	0	2	1	1	1	25.5	0	1	1	0	1	0	0	0	0	0	1	1	0	34450021	0	1	2	3	34450021	344500	0	-3.88	-1.8	-3.61
3445002111	4	1	3	0	1	1	22.7	0	1	2	1	1	1	0	0	0	0	1	1	0	34450021	0	1	1	3	34450021	344500	0	-3.13	-2.17	-3.22
3445002111	4	0	2	0	1	0	23.8	0	1	6	0	0	0	0	0	0	0	1	1	0	34450021	0	3	2	3	34450021	344500	0	-1.78	-1.65	-2.11
3445002112	4	1	3	1	1	1	22.5	0	1	1	0	1	0	0	0	0	0	1	1	0	34450021	0	1	3	2	34450021	344500	0	-1.86	-1.39	-2.07
3445002112	4	0	3	0	0	1	27.3	0	1	3	0	0	0	0	0	0	0	1	1	0	34450021	1	2	2	3	34450021	344500	0	-2.54	.1	-1.85
3445002112	4	0	1	1	1	0	24.3	0	1	4	0	0	0	0	0	0	0	1	1	0	34450021	0	2	2	3	34450021	344500	0	-.89	-1.44	-1.42
3445002113	4	1	3	1	1	1	22.3	0	1	2	1	1	1	0	0	0	0	1	0	0	34450021	0	1	1	3	34450021	344500	0	-.87	-.6	-.95
3445002113	4	0	3	0	1	0	27.5	0	1	4	0	0	0	1	1	0	0	1	1	0	34450021	0	2	2	3	34450021	344500	0	-.99	-.26	-.87
3445002114	4	1	3	0	0	1	28.8	0	1	3	1	0	1	0	1	1	1	1	1	0	34450021	0	2	1	1	34450021	344500	0	.23	-1.73	-.75
3445002114	4	0	3	0	1	0	28.8	0	1	6	1	0	0	1	1	0	0	1	0	0	34450021	0	3	2	3	34450021	344500	0	.07	-1.1	-.66
3445002115	4	1	3	0	1	1	21.5	0	1	1	1	1	0	0	0	0	0	1	1	0	34450021	1	1	3	2	34450021	344500	0	-.66	-.28	-.59
3445002116	4	1	3	1	0	1	37.1	0	1	3	1	0	0	0	0	1	1	1	1	0	34450021	0	2	3	1	34450021	344500	0	-.39	-.23	-.41
3445002116	4	0	1	0	1	0	20.7	0	1	1	1	1	0	0	0	0	0	0	1	0	34450021	0	1	2		34450021	344500	0	-.88	.83	-.26
3445002122	4	0	1	1	1	0	21.7	0	1	3	0	0	0	0	0	0	0	1	1	0	34450021	0	2	2	3	34450021	344500	0	1.98	-2.38	-.09
3445002201	4	1	2	1	1	1	22.9	0	1	2	1	0	0	0	0	0	0	1	1	0	34450022	0	1	2	2	34450022	344500	0	-1.54	-1.32	-2.22
3445002201	4	0	1	0	1	0	27.4	0	1	1	0	1	1	0	0	0	0	1	1	1	34450022	0	1	1	3	34450022	344500	0	-1.98	-1.41	-2.1
3445002202	4	1	3	0	0	1	30.6	0	1	3	1	0	0	0	0	0	1	1	1	0	34450022	0	2	2	1	34450022	344500	0	-.87	-2.36	-1.79
3445002202	4	0	3	0	0	1	26.9	0	1	2	1	1	1	0	0	0	0	1	1	0	34450022	0	1	1	3	34450022	344500	0	-.46	-1.74	-1.57
3445002203	4	1	3	0	1	1	24.1	0	1	6	0	0	0	0	0	0	1	1	1	0	34450022	0	3	2	1	34450022	344500	0	-.91	-.96	-1.27
3445002203	4	0	3	0	1	0	24.7	0	1	5	0	0	0	1	1	0	0	1	1	0	34450022	0	3	3	3	34450022	344500	0	-1.87	.16	-1.18
3445002204	4	1	2	1	0	1	30.7	0	1	5	1	0	0	0	0	0	1	1	1	0	34450022	0	3	2	1	34450022	344500	0	-1.37	-.21	-1.09
3445002204	4	0	2	0	1	0	24.4	0	1	4	1	0	1	0	0	0	0	1	1	0	34450022	0	2	1	3	34450022	344500	0	-1.22	-.12	-1
3445002205	4	1	2	0	0	1	27.8	0	1	4	0	0	0	0	0	0	1	1	1	0	34450022	0	2	2	1	34450022	344500	0	-.35	-1.34	-.96
3445002205	4	0	3	0	1	1	22.8	0	1	2	0	1	0	0	0	0	0	1	1	1	34450022	1	1	3	3	34450022	344500	0	-1.2	-.33	-.95
3445002206	4	1	3	0	1	1	21.3	0	1	2	0	1	0	0	0	0	1	1	1	0	34450022	0	1	2	1	34450022	344500	0	-1.15	-.05	-.88
3445002206	4	0	3	0	1	0	25.5	0	1	5	0	0	0	1	1	0	0	1	1	0	34450022	0	3	3	3	34450022	344500	0	-.65	.09	-.5
3445002207	4	0	3	0	1	1	24.4	0	1	5	0	0	0	0	0	0	0	1	1	0	34450022	0	3	3	3	34450022	344500	0	-.75	.84	-.18
3445002208	4	1	3	1	0	1	28.5	0	1	5	1	0	0	0	0	0	1	1	1	0	34450022	1	3	2	1	34450022	344500	0	.36	-.58	.02
3445002208	4	0	2	1	1	1	21.3	0	1	2	0	1	0	0	0	0	0	0	1	0	34450022	0	1	3	3	34450022	344500	0	1.18	-.71	.43
3445002209	4	1	3	1	1	1	27.3	0	1	6	0	0	0	0	0	1	1	1	1	0	34450022	0	3	2	1	34450022	344500	0	-.62	1.84	.92
3445002209	4	0	3	1	1	1	22.3	0	1	2	0	1	0	0	1	0	0	0	1	1	34450022	1	1	3	3	34450022	344500	0	-3.25	-.05	-2.42
3445002210	4	1	3	0	1	1	21.4	0	1	2	1	0	0	0	0	0	1	1	1	0	34450022	0	1	2	1	34450022	344500	0	-1.63	-1.29	-1.84
3445002210	4	0	2	0	0	0	28.6	0	1	6	0	0	0	0	1	0	0	1	0	0	34450022	1	3	3	3	34450022	344500	0	-.45	-2.5	-1.75
3445002211	4	1	2	1	1	1	21.9	0	1	2	0	0	0	0	0	0	0	1	1	0	34450022	1	1	2	3	34450022	344500	0	-1.16	-.18	-.91
3445002211	4	0	1	0	0	1	30.7	0	1	6	1	1	0	1	1	0	0	1	1	0	34450022	0	3	3	3	34450022	344500	0	-1.91	1.72	-.61
3445002212	4	1	3	1	1	1	25.9	0	1	3	0	0	0	0	0	0	1	1	0	0	34450022	1	2	2	1	34450022	344500	0	-1.16	.46	-.6
3445002212	4	0	1	1	1	1	25.4	1	1	1	1	1	0	0	0	0	0	1	1	0	34450022	0	1	3	3	34450022	344500	0	0	-1.15	-.53
3445002213	4	1	3	0	1	1	29.3	0	1	1	0	1	0	0	0	0	0	1	1	1	34450022	0	1	2	2	34450022	344500	0	.54	-1.7	-.52
3445002213	4	0	2	1	1	1	25.3	0	1	2	1	1	1	0	0	0	0	0	1	0	34450022	1	1	1	3	34450022	344500	0	-.38	-.26	-.37
3445002214	4	1	3	0	0	1	29.8	0	1	4	1	0	0	0	0	0	1	1	1	0	34450022	0	2	2	1	34450022	344500	0	-1.31	1.07	-.29
3445002214	4	0	3	0	1	0	23.8	0	1	6	1	1	0	1	0	0	0	1	1	0	34450022	0	3	2	3	34450022	344500	0	3.21	-3.75	-.1
3445002215	4	1	3	0	0	1	26	0	1	2	1	1	0	0	0	0	1	1	1	0	34450022	0	1	2	1	34450022	344500	0	.95	-.76	.23
3445002215	4	0	1	0	0	1	30.6	0	1	4	0	0	0	0	0	0	0	1	1	0	34450022	0	2	2	3	34450022	344500	0	.26	.22	.27
3445002216	4	1	3	1	1	1	26.9	0	1	4	1	0	0		1	0	1	1	1	0	34450022	0	2	2	1	34450022	344500	0	1.41	-.91	.36
3445002216	4	0	2	1	1	0	22.8	0	1	2	0	1	0	0	0	0	0	0	1	0	34450022	0	1	2	3	34450022	344500	0	.86	-.35	.36
3445002217	4	0	1	0	0	0	29.5	0	1	3	0	0	0	0	0	0	0	0	1	1	34450022	0	2	2	3	34450022	344500	0	1.19	-.24	.75
3445002301	4	1	3	1	1	1	24.6	0	1	6	1	0	0	0	0	0	1	1	1	0	34450023	0	3	2	1	34450023	344500	0	-1.56	-3.79	-3.02
3445002301	4	0	3	1	1	0	22.8	0	1	2	0	1	0	0	0	0	0	1	1	0	34450023	1	1	2	3	34450023	344500	0	-1.86	-1.94	-2.3
3445002302	4	1	3	1	1	1	22.4	0	1	1	0	0	0		0	0	0	1	0	0	34450023	1	1	2	3	34450023	344500	0	-3.65	1.15	-2.19
3445002302	4	0	3	0	1	1	26.3	0	1	6	1	0	0	0	0	0	0	1	1	0	34450023	0	3	2	3	34450023	344500	0	-.62	-3.01	-2.15
3445002303	4	1	3	1	1	1	23.8	0	1	2	1	1	0	0	1	1	0	1	1	0	34450023	1	1	2	3	34450023	344500	0	-1.18	-2.57	-2.11
3445002303	4	0	3	0	1	1	26.1	0	1	2	1	1	0	0	0	0	0	1	1	0	34450023	1	1	2	3	34450023	344500	0	-1.11	-1.62	-1.82
3445002304	4	1	3	0	1	1	27.7	0	1	4	1	0	0	0	0	0	1	1	0	0	34450023	0	2	2	1	34450023	344500	0	-2.41	.25	-1.67
3445002304	4	0	2	1	1	1	25.7	0	1	2	0	0	0	0	0	0	0	1	1	0	34450023	0	1	2	3	34450023	344500	0	-.43	-2.14	-1.47
3445002305	4	1	1	0	1	1	22.9	0	1	2	1	1	0	0	0	0	0	0	0	0	34450023	1	1	2	2	34450023	344500	0	-1.12	-.78	-1.25
3445002305	4	0	3	1	1	0	24.7	0	1	4	1	0	0	0	0	0	0	1	1	0	34450023	0	2	2	3	34450023	344500	0	-2.14	1.29	-1
3445002306	4	1	1	0	1	1	23.7	0	1	2	1	1	0	0	0	0	0	1	1	0	34450023	1	1	2	3	34450023	344500	0	-1.42	.16	-.92
3445002306	4	0	3	0	1	0	23.8	0	0	5	0	0	0	0	0	0	0	0	1	1	34450023	1	3	2	3	34450023	344500	0	-.34	-.98	-.73
3445002307	4	1	3	1	1	1	22.9	0	1	2	1	1	0	0	0	0	0	1	1	0	34450023	1	1	2	3	34450023	344500	0	-1.37	.57	-.61
3445002307	4	0	3	1	1	1	23.3	0	1	2	0	1	0	0	1	0	0	1	1	1	34450023	0	1	2	3	34450023	344500	0	.03	-1.09	-.56
3445002308	4	1	3	0	0	1	35.8	0	1	2	0	0	0	0	0	0	0	1	0	0	34450023	0	1	2	3	34450023	344500	0	.09	-1.1	-.54
3445002308	4	0	1	0	1	1	28.6	0	1	6	1	0	0	0	0	0	0	1	1	0	34450023	1	3	2	3	34450023	344500	0	-2.87		2.4
3445002309	4	1	3	1	1	1	27.2	0	1	6	1	0	0	0	0	0	1	1	0	0	34450023	1	3	2	1	34450023	344500	0	-3.04	-2.16	-3.23
3445002309	4	0	3	1	1	1	22.1	0	1	2	1	1	0	0	0	0	0	1	1	0	34450023	0	1	2	3	34450023	344500	0	-3.05	-2.08	-3.23
3445002310	4	1	3	0	1	1	22.7	0	1	2	1	1	0	0	0	0	0	1	1	0	34450023	0	1	2	2	34450023	344500	0	-.25	-2.21	-1.26
3445002310	4	0	2	1	1	0	24.5	0	1	2	1	1	0	0	0	0	0	1	1	0	34450023	1	1	2	3	34450023	344500	0	-2.55	1.51	-1.25
3445002311	4	1	2	0	1	1	22.5	0	1	2	1	0	0	0	0	0	0	1	1	0	34450023	0	1	2	3	34450023	344500	0	-1.32	.59	-.75
3445002311	4	0	2	1	1	1	22.8	1	1	1	0	1	0				0	1	1	0	34450023	0	1	2	3	34450023	344500	0	-.85	-.17	-.68
3445002312	4	1	3	1	1	1	22.8	0	1	1	0	1	0	0	0	0	0	1	1	0	34450023	0	1	2	3	34450023	344500	0	-.22	-.47	-.42
3445002312	4	0	1	0	1	0	22.8	0	1	3	1	0	0	0	0	1	0	0	1	0	34450023	0	2	2	3	34450023	344500	0	-1.16	.87	-.32
3445002313	4	1	3	0	1	1	24.6	0	1	5	1	0	0	0	0	0	1	1	1	0	34450023	0	3	2	1	34450023	344500	0	-.79	.35	-.3
3445002313	4	0	3	1	1	1	23.9	0	1	3	1	0	0	0	0	0	0	0	1	0	34450023	0	2	2	3	34450023	344500	0	.89	-.97	-.24
3445002314	4	1	3	1	1	1	22.8	0	0	2	1	1	0	0	0	0	0	1	1	0	34450023	0	1	2	3	34450023	344500	0	-.64	.62	-.09
3445002314	4	0	2	0	1	1	28.4	1	1	4	0	0	0	1	1	0	0	0	1	1	34450023	1	2	2	3	34450023	344500	0	-.48	.66	-.07
3445002315	4	1	2	0	1	1	24.3	0	1	2	0	1	0	0	0	0	0	1	1	0	34450023	1	1	2	3	34450023	344500	0	0	.19	.08
3445002315	4	0	1	0	0	0	27	0	1	4	1	1	0	1	1	0	0	0	1	1	34450023	0	2	2	3	34450023	344500	0	1.25	-.89	.13
3445002316	4	1	3	0	1	1	28.7	0	1	4	0	0	0	0	1	1	1	1	1	0	34450023	0	2	2	1	34450023	344500	0	.24	.43	.38
3445002316	4	0	2	0	1	0	25.3	0	1	5	0	0	0	0	0	0	0	1	0	0	34450023	0	3	2	3	34450023	344500	0	.87	1.19	1.46
3445002401	4	1	2	0	0	1	31.3	0	1	6	1	0	1	0	0	0	1	1	0	1	34450024	0	3	1	1	34450024	344500	0	-3.12	-2.33	-3.45
3445002401	4	0	3	0	1	0	22.7	0	1	2	1	1	0	0	1	0	0	1	1	1	34450024	0	1	2	3	34450024	344500	0	-2.57	-1.59	-2.53
3445002402	4	1	1	0	1	1	26.8	0	1	3	1	0	0	0	1	1	1	1	1	0	34450024	0	2	3	1	34450024	344500	0	-1.49	-2.79	-2.43
3445002402	4	0	3	0	1	1	26.4	0	1	4	1	0	0	0	1	0	0	1	1	0	34450024	0	2	3	3	34450024	344500	0	-.71	-3.38	-2.2
3445002403	4	1	1	0	0	1	29.8	0	1	3	1	0	1	0	0	0	1	1	1	0	34450024	0	2	1	1	34450024	344500	0	-1.54	-2.05	-2.15
3445002403	4	0	3	1	1	0	22.3	0	1	2	1	1	1	0	0	0	0	1	1	0	34450024	0	1	1	3	34450024	344500	0	-.75	-2.25	-1.64
3445002404	4	1	1	1	1	1	23.6	0	1	2	1	1	1	0	0	0	0	1	1	0	34450024	0	1	1	3	34450024	344500	0	-.28	-1.79	-1.34
3445002404	4	0	1	0	1	0	24.5	0	1	4	1	0	0	0	0	0	0	1	1	0	34450024	1	2	3	3	34450024	344500	0	-1.02	-1.21	-1.31
3445002405	4	1	3	0	1	1	24.3	0	1	4	1	0	1	0	0	0	1	1	1	0	34450024	0	2	1	1	34450024	344500	0	-.58	-1.49	-1.3
3445002405	4	0	3	0	1	0	22.1	0	1	1	0	1	0	0	0	0	0	1	1	0	34450024	0	1	3		34450024	344500	0	-.37	-1.51	-1.07
3445002406	4	1	2	1	1	1	22	0	1	1	0	1	0	0			0	1	1	1	34450024	0	1	3	3	34450024	344500	0	-1.47	.27	-.99
3445002406	4	0	2	1	1	0	23.6	0	1	5	1	0	0	0	0	0	0	0	1	0	34450024	0	3	3	3	34450024	344500	0	-.22	-1.5	-.92
3445002407	4	1	3	0	1	1	22.3	0	1	2	0	1	0	0	0	0	0	1	1	0	34450024	0	1	3	3	34450024	344500	0	-.05	-1.29	-.71
3445002407	4	0	3	0	0	0	29.6	0	1	5	1	0	0	0	0	0	1	0	1	0	34450024	1	3	3	1	34450024	344500	0	-.33	-.71	-.62
3445002408	4	1	3	0	0	1	32.6	0	1	1	1	1	1	1	0	0	0	1	1	0	34450024	0	1	1	3	34450024	344500	0	-.76	1.44	.05
3445002408	4	0	3	0	1	0	24.4	0	1	2	1	0	0	0	0	0	1	1	1	0	34450024	0	1	3	1	34450024	344500	0	-1.86	2.67	.28
3445002409	4	1	3	0	0	1	30.8	0	1	3	1	0	0	0	0	0	0	1	1	0	34450024	0	2	3	3	34450024	344500	0	-4.59	-1.59	-4.07
3445002409	4	0	3	0	1	0	25.3	0	1	2	0	1	0	0	0	0	0	1	0	0	34450024	0	1	3	3	34450024	344500	0		.6	-3.64
3445002410	4	1	2	0	1	1	23	0	1	2	0	0	1	0	0	0	0	1	0	0	34450024	0	1	1	3	34450024	344500	0	-4.15	.01	-3.05
3445002410	4	0	2	0	1	0	24.9	0	1	3	0	0	1	0	0	0	0	0	0	1	34450024	1	2	1	3	34450024	344500	0	-4.52	1.77	-2.05
3445002411	4	1	1	0	0	1	34.8	0	1	5	1	0	1	0	0	0	1	1	1	0	34450024	0	3	1	1	34450024	344500	0	-2.58	.41	-1.7
3445002411	4	0	2	1	1	0	25.9	1	1	3	1	1	0	0	0	0	1	0	1	0	34450024	0	2	3	1	34450024	344500	0	-1.44	-1.09	-1.66
3445002412	4	1	1	0	1	1	25.8	0	1	2	1	0	1	1	0	0	0	1	1	0	34450024	0	1	1	3	34450024	344500	0	-3.97	1.79	-1.63
3445002412	4	0	3	0	1	0	22.8	0	1	3	0	1	1	0	0	0	1	0	1	0	34450024	1	2	1	1	34450024	344500	0	-1.55	-1.04	-1.6
3445002413	4	1	3	0	1	1	25.3	0	1	1	0	1	0	1	0	0	0	1	1	0	34450024	0	1	3	3	34450024	344500	0	-1.72	-.36	-1.42
3445002413	4	0	2	0	0	0	29.3	0	1	3	1	1	0	0	0	0	0	1	1	0	34450024	0	2	3	3	34450024	344500	0	-1.27	-.67	-1.28
3445002414	4	1	3	1	1	1	23.2	0	1	1	1	1	0	0	0	0	0	1	1	0	34450024	0	1	3	3	34450024	344500	0	-3.12	1.02	-1.18
3445002414	4	0	1	1	1	0	22.1	0	1	2	0	1	0	0	0	0	0	1	1	1	34450024	1	1	3	3	34450024	344500	0	-1.55	.35	-1
3445002415	4	1	1	0	1	1	25.9	0	1	5	0	1	1	0	0	0	1	1	1	0	34450024	0	3	1	1	34450024	344500	0	1.2	-1.45	-.06
3445002415	4	0	3	0	1	1	23.1	0	1	2	0	1	1	0	0	0	0	1	1	1	34450024	0	1	1		34450024	344500	0	1.14	-1.02	.17
3445002416	4	1	1	1	1	1	23.3	0	1	2	0	1	1	0	0	0	0	1	1	0	34450024	0	1	1	3	34450024	344500	0	-.12	.81	.32
3445002416	4	0	3	0	1	0	22	0	1	2	1	1	1	0	1	0	0	1	0	0	34450024	0	1	1	3	34450024	344500	0	.36	1.55	.9
3445002417	4	0	3	0	1	1	21.8	0	1	1	1	1	0	0	0	0	0	1	1	0	34450024	0	1	3		34450024	344500	0	-.96		-4.71
3445002418	4	0	1	0	1	0	23	0	1	4	1	0	0	0	0	0	0	1	0	0	34450024	0	2	3	3	34450024	344500	0	-1.61	-2.78	-2.67
3445002501	4	0	2	0	0	0	34.9	0	1	6	1	0	0	0	0	0	0	1	1	0	34450025	0	3	2	3	34450025	344500	0	-1.01	-2.67	-1.99
3445002502	4	0	2	1	1	0	22.8	0	1	2	0	1	0	0	0	0	0	0	1	0	34450025	0	1	2	3	34450025	344500	0	-1.79	-1.08	-1.99
3445002503	4	0	1	0	0	1	30.6	0	1	4	0	0	0	0	0	0	0	1	1	0	34450025	0	2	2	3	34450025	344500	0	-1.32	-1.8	-1.8
3445002504	4	0	3	0	1	0	23.8	0	1	6	1	1	0	1	0	0	0	1	1	0	34450025	0	3	2	3	34450025	344500	0	-2.89	.62	-1.76
3445002505	4	0	1	0	0	0	27	0	1	2	1	1	0	0	0	0	0	0	1	1	34450025	0	1	2	3	34450025	344500	0	-1.1	-.9	-1.35
3445002506	4	0	2	0	1	0	25.3	0	1	5	0	0	0	0	0	0	0	1	0	0	34450025	0	3	2	3	34450025	344500	0	-.13	-1.39	-.94
3445002507	4	0	2	0	1	1	28.4	1	1	4	0	0	0	1	1	0	0	0	1	1	34450025	1	2	2	3	34450025	344500	0	.58	-1.52	-.55
3445002509	4	0	1	0	1	0	22.8	0	1	3	1	0	0	0	0	1	0	0	1	0	34450025	0	2	2	3	34450025	344500	0	-1.25	.81	-.55
3445003101	4	1	2	1	1	1	28.3	1	1	2	0	0	0	0	0	0	0	1	1	0	34450031	0	1	2	3	34450031	344500	0	1.33	-1.59	-.47
3445003101	4	0	2	0	1	1	27.6	0	1	5	1	0	0	1	0	0	0	0	1	0	34450031	0	3	2	3	34450031	344500	0	-.39	-.1	-.35
3445003102	4	1	3	1	1	1	25.8	0	1	4	0	0	0	0	0	0	1	1	1	0	34450031	0	2	2	1	34450031	344500	0	.66	-.85	0
3445003102	4	0	1	0	1	1	23.7	0	1	4	1	0	0	0	0	0	0	0	1	1	34450031	1	2	2	3	34450031	344500	0	.13	-.17	.02
3445003103	4	0	2	1	1	1	24.3	0	1	4	1	0	0	0	0	0	0	0	1	0	34450031	1	2	2	3	34450031	344500	0	-1.3	1.13	.03
3445003104	4	1	3	1	1	1	28.5	0	1	2	1	0	0	0	0	0	0	1	1	1	34450031	0	1	2	3	34450031	344500	0	1.42	-.23	.78
3445003104	4	0	1	1	1	0	24	0	1	2	1	1	0	0	0	0	0	1	0	0	34450031	1	1	2	3	34450031	344500	0		-.03	-4.05
3445003105	4	1	3	0	1	1	24.9	0	1	6	1	0	0	0	0	0	1	1	1	0	34450031	0	3	2	1	34450031	344500	0	-2.99	-1.75	-3.07
3445003105	4	0	1	1	1	1	21.5	0	1	2	1	1	0	0	1	0	0	1	1	1	34450031	0	1	2	3	34450031	344500	0	-2.26	-1.36	-2.49
3445003106	4	1	2	1	1	1	28.6	0	1	3	0	0	0	0	0	0	1	1	1	0	34450031	1	2	2	1	34450031	344500	0	-2.35	-.59	-1.98
3445003106	4	0	1	0	1	1	25.6	0	1	6	0	0	0	0	0	0	1	1	1	0	34450031	0	3	2	1	34450031	344500	0	-1.68	-.64	-1.68
3445003107	4	1	3	1	1	1	23.7	0	1	3	0	0	0	0	0	0	1	1	1	0	34450031	0	2	2	1	34450031	344500	0	-1	-1.96	-1.66
3445003107	4	0	3	0	1	1	28.3	0	1	3	0	0	0	0	0	0	0	1	0	0	34450031	0	2	2	3	34450031	344500	0	-1.25	-.95	-1.56
3445003108	4	1	1	0	0	1	30.3	0	1	4	1	0	0	0	0	0	1	1	1	0	34450031	1	2	2	1	34450031	344500	0	-1.8	-.25	-1.43
3445003108	4	0	2	0	0	0	29.1	0	1	5	1	0	0	0	0	0	0	0	1	0	34450031	1	3	2	3	34450031	344500	0	-1.83	.22	-1.27
3445003109	4	1	2	1	0	1	29.8	0	1	6	1	0	0		0		1	1	1	0	34450031	0	3	2	1	34450031	344500	0	-1.93	.21	-1.17
3445003109	4	0	3	0	1	1	25.9	0	1	4	1	0	0	0	0	0	0	1	1	0	34450031	1	2	2	3	34450031	344500	0	-.85	-1.05	-1.08
3445003110	4	1	3	0	1	1	25.8	0	1	6	1	0	0	0	0	0	1	0	1	0	34450031	1	3	2	1	34450031	344500	0	-1.51	.44	-.92
3445003110	4	0	1	0	0	1	29.1	0	1	3	1	0	0	0	0	0	0	1	0	1	34450031	0	2	2	3	34450031	344500	0	.39	-1.67	-.77
3445003111	4	1	3	0	1	1	23.5	0	1	4	0	0	0	0	1	1	1	1	1	0	34450031	0	2	2	1	34450031	344500	0	.43	-1.56	-.48
3445003111	4	0	3	1	1	1	23.9	0	1	2	1	1	0	0	0	0	0	0	1	0	34450031	0	1	2	3	34450031	344500	0	-.18	-.36	-.29
3445003112	4	1	3	0	0	1	30.5	0	1	6	1	0	0	0	0	0	1	1	1	0	34450031	1	3	2	1	34450031	344500	0	-.5	.78	-.03
3445003112	4	0	3	0	1	0	25.2	0	1	2	1	1	0	0	0	0	0	0	1	1	34450031	1	1	2	3	34450031	344500	0	-1.86	-1.53	-2.1
3445003113	4	1	2	0	0	1	26.6	0	1	3	1	0	0	1	0	0	1	1	1	0	34450031	0	2	2	1	34450031	344500	0	-1.77	-.88	-1.77
3445003113	4	0	3	0	1	1	23.6	0	1	4	1	0	0	0	0	0	1	1	1	1	34450031	0	2	2	1	34450031	344500	0	-3.16	.42	-1.63
3445003114	4	1	3	1	1	1	22.7	0	1	5	1	1	0	0	0	0	1	1	1	0	34450031	0	3	2	1	34450031	344500	0	-2.01	-.32	-1.61
3445003114	4	0	3	0	0	0	30.4	0	1	3	1	0	0	1	1	0	0	0	1	0	34450031	0	2	2	3	34450031	344500	0	-.36	-1.64	-1.35
3445003115	4	1	3	0	1	1	26.4	0	1	1	0	1	0	0	0	0	1	1	1	0	34450031	0	1	2	1	34450031	344500	0	1.8	-3.45	-1.25
3445003115	4	0	3	0	0	0	30	0	1	3	1	0	0	0	0	0	0	0	1	1	34450031	1	2	2	3	34450031	344500	0	.25	-2.25	-1.02
3445003116	4	1	2	0	0	1	32.6	0	1	1	0	1	0	0	0	0	0	1	1	0	34450031	0	1	2	3	34450031	344500	0	-1.03	-.49	-1.02
3445003116	4	0	1	1	1	1	22	0	1	2	0	1	0	0	0	0	0	1	1	0	34450031	1	1	2	3	34450031	344500	0	-.55	-1	-.91
3445003117	4	0	1	0	0	0	19.8	0	1	6	1	0	0	0	0	0	0	0	1	0	34450031	1	3	2	3	34450031	344500	0	-.47	-.22	-.54
3445003118	4	0	1	0	1	0	24.1	0	1	4	1	1	0	0	1	0	0	1	1	0	34450031	0	2	2	3	34450031	344500	0	-.37	-.29	-.46
3445003119	4	0	3	1	1	0	24.5	0	1	5	1	0	0	0	0	0	0	1	1	1	34450031	1	3	2	3	34450031	344500	0	1.63	-1.67	.01
3445003120	4	0	2	0	1	0	23.5	0	1	4	1	0	0	0	0	0	0	1	0	1	34450031	1	2	2	3	34450031	344500	0	.61	-.17	.3
3445003121	4	0	3	0	1	0	27.8	0	1	5	1	0	0	0	0	0	0	1	1	0	34450031	0	3	2	3	34450031	344500	0	-1.07	1.8	.44
3445003201	4	1	3	0	1	1	27	0	1	3	0	0	0	0	0	1	1	1	1	0	34450032	0	2	2	1	34450032	344500	0	.3	.53	.6
3445003201	4	0	3	0	1	1	22.6	0	1	5	1	0	0	0	0	0	0	1	1	0	34450032	0	3	3	3	34450032	344500	0	1.43	-.64	.77
3445003202	4	1	3	1	0	1	27.6	0	1	3	1	0	0	0	0	0	1	0	1	0	34450032	0	2	2	1	34450032	344500	0			-2.25
3445003203	4	1	3	1	1	1	24.6	0	1	2	1	0	0	0	0	0	0	1	1	1	34450032	0	1	2	3	34450032	344500	0	-1.77	-1.78	-2.18
3445003203	4	0	3	0	1	1	21.9	0	1	2	1	1	0	0	0	0	0	1	1	0	34450032	0	1	3	3	34450032	344500	0	.34	-4.08	-2.08
3445003204	4	1	1	1	1	1	24.8	0	1	1	1	1	0	0	0	0	0	1	1	0	34450032	0	1	2	3	34450032	344500	0	-.89	-2.15	-1.78
3445003204	4	0	2	1	1	1	23.6	0	1	1	0	1	1	0	0	0	0	0	1	0	34450032	0	1	1	3	34450032	344500	0	.61	-3.17	-1.45
3445003205	4	1	3	1	1	1	22.7	0	1	3	0	1	0	0	0	0	0	1	1	0	34450032	0	2	2	3	34450032	344500	0	-.69	-1.96	-1.43
3445003205	4	0	3	0	1	1	26.4	0	1	4	1	0	0	1	0	0	0	0	1	0	34450032	0	2	3	3	34450032	344500	0	-.69	-1.06	-1
3445003206	4	1	3	1	1	1	20.8	0	1	3	1	0	0	0	0	0	0	1	1	0	34450032	0	2	2	3	34450032	344500	0	-.45	-1.11	-.84
3445003206	4	0	3	0	0	0	31.4	0	1	5	1	0	0	1	1	0	0	1	1	1	34450032	0	3	3	3	34450032	344500	0	.41	-1.66	-.6
3445003207	4	1	1	0	0	1	33.8	0	1	3	1	0	0	0	0	0	1	1	1	0	34450032	0	2	2	1	34450032	344500	0	.91	-2.21	-.38
3445003207	4	0	3	1	1	1	26.1	0	1	6	1	0	0	0	1	0	1	0	1	0	34450032	0	3	3	1	34450032	344500	0	1.37	-2.49	-.15
3445003208	4	1	1	1	1	1	24.2	0	1	2	0	1	0	0	0	0	0	1	1	0	34450032	0	1	2	3	34450032	344500	0	.57	-.57	.12
3445003209	4	1	3	1	0	1	30.8	0	1	1	0	1	0	0	0	0	0	1	0	0	34450032	1	1	2	3	34450032	344500	0	1.76	-1.49	.46
3445003209	4	0	3	0	0	1	27.6	0	1	1	1	1	1	0	0	0	0	1	1	0	34450032	1	1	1	3	34450032	344500	0	2.55	-2.77	.67
3445003210	4	1	2	1	1	1	22.2	1	1	1	1	1	0	0	0	0	0	1	1	0	34450032	0	1	2	3	34450032	344500	0	.92	.73	1.18
3445003210	4	0	3	0	1	1	21.8	0	1	1	0	1	1	0	0	0	0	1	1	0	34450032	0	1	1	3	34450032	344500	0	1.99	.05	1.39
3445003211	4	1	3	1	0	1	30.3	0	1	3	0	0	0	0	0	0	1	1	1	0	34450032	1	2	2	1	34450032	344500	0	-1.73	-2.16	-2.37
3445003211	4	0	3	1	1	1	23.8	0	1	6	1	0	0	0	1	1	0	1	1	0	34450032	0	3	3	3	34450032	344500	0	-1.48	-1.85	-2.3
3445003212	4	1	3	1	1	1	21.2	0	1	1	0	1	0	0	0	0	0	1	1	0	34450032	0	1	2	3	34450032	344500	0	-1.78	-.98	-1.83
3445003212	4	0	3	0	1	1	23.7	0	1	3	0	0	0	0	0	0	0	1	1	0	34450032	0	2	3	3	34450032	344500	0	-1.52	-.85	-1.5
3445003213	4	1	2	1	0	1	32.7	0	1	5	1	0	0	0	0	0	1	1	1	0	34450032	0	3	2	1	34450032	344500	0	-1.09	-1.12	-1.3
3445003213	4	0	3	0	1	0	22.2	0	1	2	1	0	0	1	0	0	0	1	1	0	34450032	0	1	2	3	34450032	344500	0	-.06	-1.8	-1.11
3445003214	4	1	3	1	1	1	23.8	0	1	2	1	1	0	0	0	0	0	1	1	0	34450032	0	1	2	3	34450032	344500	0	-.21	-1.82	-.99
3445003214	4	0	3	1	1	1	24.8	0	1	4	0	0	0	0	0	0	0	0	1	0	34450032	0	2	3	3	34450032	344500	0	-1.53	.16	-.98
3445003215	4	1	1	1	1	1	22.3	0	1	1	1	1	0	0	1	1	0	1	1	0	34450032	1	1	2	3	34450032	344500	0	-.4	-.6	-.7
3445003215	4	0	3	0	1	1	22.3	0	1	2	1	1	0				1	1	1	0	34450032	0	1	3	1	34450032	344500	0	-.52	-.49	-.6
3445003216	4	1	3	0	0	1	27.5	0	1	1	1	1	0	0	0	0	0	1	1	0	34450032	1	1	2	3	34450032	344500	0	-.94	.37	-.55
3445003216	4	0	3	0	1	0	21.8	0	1	3	0	0	0	0	0	0	0	1	1	0	34450032	1	2	3	3	34450032	344500	0	-.34	-.28	-.52
3445003217	4	0	2	0	1	1	21.8	0	1	2	0	0	1	0	0	0	0	1	1	0	34450032	1	1	1	3	34450032	344500	0	-.11	.21	.02
3445003301	4	1	2	0	1	1	22.2	0	1	3	1	0	0	0	0	0	1	1	1	0	34450033	1	2	3	1	34450033	344500	0	2.47	-1.52	.38
3445003301	4	0	2	0	1	1	26	0	1	5	0	0	0	1	0	0	0	1	0	0	34450033	0	3	3	3	34450033	344500	0		-5.49	.74
3445003302	4	1	3	1	1	1	21.7	0	1	1	1	1	0	0	0	0	0	1	1	0	34450033	0	1	3	3	34450033	344500	0	-3.16	-2.58	-3.42
3445003302	4	0	3	0	1	0	29.8	0	1	4	0	0	1	0	1	1	0	1	1	0	34450033	0	2	1	3	34450033	344500	0	-2.95	-1.45	-2.88
3445003303	4	1	3	1	1	1	24.6	0	1	2	1	0	0	0	0	0	0	1	1	0	34450033	1	1	3	3	34450033	344500	0	-1.43	-2.46	-2.48
3445003303	4	0	3	0	1	0	26.5	0	1	6	0	0	0	0	0	0	0	1	1	0	34450033	0	3	3	3	34450033	344500	0	-1.88	-1.29	-2.18
3445003304	4	1	3	1	1	1	23	0	1	2	1	1	1	0	0	0	0	1	1	0	34450033	1	1	1	3	34450033	344500	0	-1.92	-.66	-1.73
3445003304	4	0	1	0	1	0	24.9	0	1	6	1	0	0	0	0	0	0	1	1	0	34450033	0	3	3	3	34450033	344500	0	-.31	-2.75	-1.53
3445003305	4	1	3	1	1	1	22.6	0	1	6	1	0	0	0	0	0	1	1	1	0	34450033	0	3	3	1	34450033	344500	0	-1.1	-1.11	-1.46
3445003305	4	0	1	0	1	0	24.1	0	1	5	0	0	0	0	0	0	0	1	0	0	34450033	0	3	3	3	34450033	344500	0	-1.69	-.51	-1.42
3445003306	4	1	1	0	1	1	22.8	0	1	4	0	0	0	0	0	0	1	1	1	0	34450033	0	2	3	1	34450033	344500	0	-1.58	-.58	-1.38
3445003306	4	0	3	1	1	1	26.3	0	1	4	1	0	1	0	0	0	0	1	0	0	34450033	0	2	1	3	34450033	344500	0	-.64	-1.62	-1.21
3445003307	4	1	2	0	0	1	26.8	0	1	1	0	0	1	0	0	0	0	1	1	0	34450033	0	1	1	3	34450033	344500	0	.11	-2.09	-1
3445003307	4	0	3	1	1	0	27.2	0	1	1	1	1	0	0	0	1	0	1	1	0	34450033	0	1	3	3	34450033	344500	0	-.36	-.72	-.91
3445003308	4	1	3	1	1	1	22.9	0	1	3	0	0	0	0	0	0	1	1	0	0	34450033	1	2	3	1	34450033	344500	0	.05	-1.62	-.9
3445003308	4	0	3	0	0	1	28.1	0	1	1	1	1	0	0	0	0	0	1	1	0	34450033	0	1	3	3	34450033	344500	0	.12	-1.5	-.62
3445003309	4	1	3	1	1	1	24.4	0	1	5	1	0	0	0	0	0	1	1	1	0	34450033	1	3	3	1	34450033	344500	0	-.98	.65	-.19
3445003309	4	0	3	0	1	0	23.8	0	1	5	1	0	0	0	1	0	0	1	1	0	34450033	0	3	3	3	34450033	344500	0	1.33	-.35	.79
3445003310	4	1	3	0	0	0	28.2	0	1	4	1	0	1	0	0	0	1	1	1	0	34450033	0	2	1	1	34450033	344500	0	-.82	-2.83	-2.3
3445003310	4	0	3	0	1	1	21.9	0	1	1	0	1	0	0	0	0	0	1	1	0	34450033	1	1	3	3	34450033	344500	0	-1.14	-2.13	-2.05
3445003311	4	1	2	0	0	1	30.5	0	1	3	1	0	1	0	0	0	0	1	1	0	34450033	0	2	1	3	34450033	344500	0	-1.44	-1.74	-1.91
3445003311	4	0	3	0	1	0	24.7	0	1	4	0	0	0	0	0	0	0	1	1	0	34450033	1	2	3	3	34450033	344500	0	-1.45	-.94	-1.82
3445003312	4	1	2	0	1	1	21.8	0	1	2	1	1	0	0	0	0	0	1	0	0	34450033	1	1	2	3	34450033	344500	0	-1.76	-1.05	-1.75
3445003312	4	0	3	0	1	0	26.9	0	1	3	1	0	0	0	0	0	0	1	0	1	34450033	0	2	3	3	34450033	344500	0	-1.91	-.58	-1.71
3445003313	4	1	2	0	1	1	23.9	0	1	5	0	0	0	0	0	0	1	1	1	0	34450033	0	3	3	1	34450033	344500	0	-1.21	-.91	-1.46
3445003313	4	0	3	0	1	1	23.5	0	1	2	1	1	0	0	0	0	0	1	1	0	34450033	0	1	3	3	34450033	344500	0	-.19	-2.24	-1.26
3445003314	4	1	2	1	1	1	22.9	0	1	3	1	0	0	0	0	0	0	1	1	0	34450033	1	2	3	3	34450033	344500	0	-.81	-.56	-.94
3445003314	4	0	3	0	1	0	24.3	0	1	1	1	1	0	0	0	0	0	1	1	0	34450033	0	1	3	3	34450033	344500	0	-.61	-.38	-.73
3445003315	4	1	3	0	0	1	29.1	0	1	2	0	1	0	0	0	0	0	1	1	0	34450033	0	1	3	3	34450033	344500	0	-.26	-.88	-.62
3445003316	4	1	3	1	1	1	24.4	0	1	1	1	1	1	0	0	0	0	1	1	0	34450033	0	1	1	3	34450033	344500	0	-.92	.75	-.36
3445003401	4	1	3	1	0	1	29.6	0	1	3	0	1	1	0	0	0	0	1	1	0	34450034	0	2	1	3	34450034	344500	0	.87	-1.83	-.21
3445003401	4	0	3	1	1	1	22.4	0	1	1	1	1	0	0	0	0	1	1	1	0	34450034	1	1	2	1	34450034	344500	0	.38	-.56	-.13
3445003402	4	1	3	0	0	1	30.9	0	1	4	1	0	0	0	0	0	1	1	1	0	34450034	0	2	2	1	34450034	344500	0	.09	1.52	.92
3445003402	4	0	3	0	1	0	23.6	0	1	5	0	0	0	0	0	0	1	1	1	0	34450034	0	3	2	1	34450034	344500	0	-1	4.64	1.15
3445003403	4	1		0	0	1	34	0	1	6	1	0	0	0	0	0	1	1	0	0	34450034	0	3	2	1	34450034	344500	0	-2.83	-3.26	-3.58
3445003403	4	0	2	1	1	1	22.3	0	1	1	1	1	0	0	0	0	0	1	0	0	34450034	0	1	2		34450034	344500	0	-1.71	-2.16	-2.3
3445003404	4	1	3	0	1	1	22.5	0	1	2	0	1	1	0	0	0	0	1	1	0	34450034	0	1	1	3	34450034	344500	0	-.08	-3.83	-2.09
3445003404	4	0	3	1	1	0	27.5	0	1	6	1	0	0	0	0	0	0	1	1	0	34450034	0	3	2	3	34450034	344500	0	-.83	-2.19	-1.74
3445003405	4	1	2	0	1	1	24.2	0	1	1	1	1	0	0	0	0	0	1	1	0	34450034	0	1	3	3	34450034	344500	0	-.76	-2.43	-1.69
3445003406	4	1	3	0	0	1	28.7	0	1	1	1	1	0	0	0	0	0	1	1	0	34450034	0	1	3	3	34450034	344500	0	-1.54	-.88	-1.53
3445003407	4	1	3	1	1	1	24.4	1	1	2	1	1	0	0	0	0	0	0	1	0	34450034	0	1	3	3	34450034	344500	0	-.3	-1.77	-1.26
3445003407	4	0	3	0	1	0	23.3	0	1	3	1	0	0	1	1	0	1	1	1	1	34450034	0	2	2	1	34450034	344500	0	-1.59	-.01	-1.2
3445003408	4	1	2	0	0	1	31	0	1	2	1	1	0	0	0	0	0	1	1	0	34450034	0	1	2	3	34450034	344500	0	-.96	-.82	-1.14
3445003410	4	1	3	0	1	1	25.7	0	1	6	0	0	0	0	0	0	1	1	1	0	34450034	1	3	2	1	34450034	344500	0	-.24	-1.95	-1.09
3445003411	4	1	2	0	0	1	30.1	0	1	1	1	1	0	0	0	0	0	1	1	0	34450034	0	1	2	3	34450034	344500	0	-1.08	-.62	-1.08
3445003413	4	1	3	0	0	0	32.7	0	1	4	0	1	0	0	0	0	1	1	1	0	34450034	0	2	2	1	34450034	344500	0	.41	-1.7	-.95
3445003414	4	1	3	1	1	1	26.1	1	1	2	0	1	0	0	0	0	0	1	1	0	34450034	0	1	3	3	34450034	344500	0	-1.96	1.97	-.4
3445003415	4	1	3	1	1	1	23.2	0	1	4	1	0	0	0	0	0	1	1	1	0	34450034	0	2	3	1	34450034	344500	0	.58	-1.38	-.25
3445003416	4	1	3	1	0	1	26.8	0	1	3	1	0	1	0	0	0	0	1	1	0	34450034	0	2	1	3	34450034	344500	0	-.74	.77	-.15
3445003501	4	0	3	0	1	0	26.8	0	1	2	1	0	0	1	1	0	1	1	1	0	34450035	1	1	2	1	34450035	344500	0	.89	-.92	.19
3445003503	4	0	2	1	1	0	21.7	0	1	3	0	1	0				0	1	1	0	34450035	0	2	2	3	34450035	344500	0	-2.56	-3.32	-3.44
3445003504	4	0	2	0	1	0	27.9	0	1	4	1	0	0	0	0	0	0	1	1	0	34450035	0	2	2	3	34450035	344500	0	-1.77	-2.27	-2.61
3445003505	4	0	3	0	1	0	27.9	0	1	6	1	0	0	0	0	0	0	0	1	0	34450035	0	3	2	3	34450035	344500	0	-1.32	-2.81	-2.5
3445004101	4	1	3	1	1	1	22.8	0	1	5	0	0	0	0	0	0	1	1	1	0	34450041	0	3	2	1	34450041	344500	0	-1.26	-1.94	-2.01
3445004101	4	0	3	0	1	1	24.4	0	1	1	0	1	1	0	0	0	0	1	1	0	34450041	0	1	1	3	34450041	344500	0	-1.19	-2.16	-1.98
3445004102	4	1	3	1	1	1	23	1	1	3	0	0	0	0	0	0	0	1	1	0	34450041	0	2	2	3	34450041	344500	0	.96	-3.64	-1.85
3445004102	4	0	1	0	1	1	22.5	0	1	1	1	1	0	0	0	0	0	1	1	0	34450041	0	1	3		34450041	344500	0	-.84	-2.25	-1.79
3445004103	4	1	2	0	1	1	23	0	1	3	1	0	0	0	0	0	1	1	1	0	34450041	0	2	2	1	34450041	344500	0	-.52	-1.97	-1.76
3445004103	4	0	3	1	1	0	22.8	0	1	2	1	1	1	0	0	0	0	1	1	0	34450041	0	1	1	2	34450041	344500	0	-.95	-1.85	-1.56
3445004104	4	1	3	1	0	1	31.8	0	1	6	1	0	0	0	0	0	1	1	1	0	34450041	1	3	2	1	34450041	344500	0	-.11	-2.44	-1.27
3445004104	4	0	2	0	0	1	30.8	0	1	5	0	0	0	0	0	0	0	0	1	0	34450041	0	3	2	3	34450041	344500	0	-1.31	.09	-.97
3445004105	4	1	3	0	1	1	22.2	0	1	1	0	1	0	0	0	0	0	1	0	0	34450041	0	1	2	3	34450041	344500	0	-.31	-1	-.7
3445004105	4	0	1	0	1	1	23.8	0	1	6	0	0	0	0	1	1	0	0	1	0	34450041	0	3	2		34450041	344500	0	-.34	-.67	-.53
3445004106	4	1	2	0	1	1	27	0	1	5	0	0	0	0	0	1	1	1	1	0	34450041	1	3	2	1	34450041	344500	0	1.98	-3.28	-.17
3445004106	4	0	3	0	1	1	27.6	0	1	2	0	1	0	0	0	0	0	1	0	0	34450041	0	1	2	3	34450041	344500	0	1.7	-.6	1.04
3445004107	4	1	2	0	0	1	26.2	0	1	4	1	0	0	0	0	0	1	1	1	1	34450041	0	2	2	1	34450041	344500	0	-.71	-4.63	-3.1
3445004107	4	0	3	0	1	0	22.4	0	1	2	0	1	0	0	0	0	0	1	1	0	34450041	0	1	2	3	34450041	344500	0	-.84	-3.82	-2.54
3445004108	4	1	3	0	1	1	24	0	1	6	1	0	0	1	1	0	1	1	1	0	34450041	0	3	2	1	34450041	344500	0	-2.05	-1.04	-2.14
3445004108	4	0	2	1	1	0	25.3	0	1	5	1	0	0	0	0	0	0	0	1	0	34450041	0	3	2	3	34450041	344500	0	-1.65	-1.87	-2.09
3445004109	4	1	3	0	1	1	27	0	1	6	0	0	0	0	0	0	1	1	1	0	34450041	0	3	2	1	34450041	344500	0	-1.69	-1.71	-2.09
3445004109	4	0	3	0	0	0	29.3	0	1	1	1	1	0	0	0	0	0	1	1	0	34450041	0	1	2		34450041	344500	0	-.91	-2.41	-2.08
3445004110	4	1	3	0	0	1	28.4	0	1	4	1	0	0	0	0	0	1	1	1	0	34450041	0	2	2	1	34450041	344500	0	-.52	-2.65	-1.86
3445004110	4	0	1	0	1	0	25.3	0	1	6	0	0	0	1	1	0	0	0	1	0	34450041	0	3	2	3	34450041	344500	0	.98	-3.24	-1.49
3445004111	4	1	3	1	1	1	21.6	0	1	2	1	0	0	0	0	0	1	1	1	0	34450041	1	1	2	1	34450041	344500	0	-2.07	.31	-1.39
3445004111	4	0	1	0	1	0	28.8	0	1	6	1	0	0	0	0	0	0	0	1	0	34450041	0	3	2	3	34450041	344500	0	.01	-2.22	-1.05
3445004112	4	1	3	0	1	1	22.8	0	1	1	1	1	0			0	0	1	1	0	34450041	0	1	2	2	34450041	344500	0	.52	-1.65	-.58
3445004112	4	0	1	0	1	0	23.9	0	1	5	0	0	0	0	0	0	0	0	1	0	34450041	0	3	2	3	34450041	344500	0	.02	-.64	-.47
3445004113	4	1	3	0	1	1	24.8	0	1	3	0	0	0	0	0	0	1	1	1	0	34450041	0	2	2	1	34450041	344500	0	.51	-1.52	-.4
3445004113	4	0	3	0	0	1	26.8	0	1	2	1	1	0	0	0	0	0	1	1	0	34450041	0	1	2	3	34450041	344500	0	-.87	1.15	-.05
3445004114	4	1	3	1	1	1	21.5	0	1	1	1	1	0	0	0	0	0	1	1	0	34450041	0	1	2	2	34450041	344500	0	.53	-.2	.34
3445004114	4	0	3	1	1	0	23.6	0	1	4	1	0	0	0	0	0	0	0	1	0	34450041	0	2	2	3	34450041	344500	0	.48	.27	.48
3445004115	4	1	2	0	0	1	30.2	0	1	5	1	0	0	0	0	0	0	1	1	0	34450041	0	3	2	2	34450041	344500	0	-2.24	-2.9	-3.59
3445004115	4	0	1	1	1	1	23.2	0	1	2	0	0	0	0	1	0	0	1	0	0	34450041	0	1	2	3	34450041	344500	0	-2.22	-3.18	-3.2
3445004116	4	1	3	1	1	1	26.3	1	1	2	1	1	0	0	0	0	0	1	1	0	34450041	0	1	2	2	34450041	344500	0	1.15	-4.33	-1.6
3445004116	4	0	3	1	1	0	26.9	0	1	2	1	1	0	0	0	0	0	1	1	0	34450041	0	1	2	3	34450041	344500	0	.53	-2.09	-1.5
3445004201	4	1	2	0	0	1	32.8	0	1	6	1	0	0	0	0	0	1	1	1	0	34450042	1	3	2	1	34450042	344500	0	.36	-3.34	-1.41
3445004201	4	0	3	0	0	1	28.6	0	1	4	1	0	0	1	1	0	1	0	1	0	34450042	1	2	2	1	34450042	344500	0	-.34	-1.73	-1.16
3445004202	4	1	3	1	1	1	30.4	0	1	3	1	0	0	0			1	1	1	0	34450042	0	2	2	1	34450042	344500	0	.44	-2.41	-.95
3445004202	4	0	3	1	0	0	27.6	0	1	4	1	0	0	0	0	0	0	1	1	0	34450042	1	2	2	3	34450042	344500	0	.12	-1.79	-.79
3445004203	4	1	3	0	1	1	31.3	0	1	4	1	0	0	0	0	0	1	1	1	0	34450042	1	2	2	1	34450042	344500	0	.53	-2.06	-.78
3445004203	4	0	3	0	1	0	29.8	0	1	1	1	1	0	0	0	0	0	1	1	1	34450042	0	1	2	3	34450042	344500	0	3.32	-3.93	-.75
3445004204	4	1	3	1	1	1	24.8	0	1	1	1	1	0	0	0	0	0	1	0	0	34450042	0	1	2	2	34450042	344500	0	.71	-2.5	-.66
3445004204	4	0	3	0	0	1	31.6	0	1	2	0	1	1	0	0	0	0	1	0	0	34450042	0	1	1	3	34450042	344500	0	-.79	-.1	-.66
3445004205	4	1	3	0	0	1	26	0	1	3	0	0	0	0	0	0	1	1	1	0	34450042	1	2	2	1	34450042	344500	0	1.65	-3.37	-.65
3445004205	4	0	3	0	1	0	24.1	0	1	3	1	1	1	1	1	0	0	0	1	0	34450042	0	2	1	3	34450042	344500	0	-.3	-.21	-.25
3445004206	4	1	3	0	0	1	31.4	0	1	5	1	0	0	0	0	0	1	1	1	0	34450042	0	3	2	1	34450042	344500	0	2.53	-3.04	.49
3445004206	4	0	1	0	1	0	22.7	0	1	4	0	0	0	0	0	0	1	1	0	0	34450042	0	2	3	1	34450042	344500	0	-.55	-4.19	-2.84
3445004207	4	1	2	0	1	1	21.8	1	1	3	0	0	0	0	0	0	1	1	1	0	34450042	0	2	2	1	34450042	344500	0	-1.89	-2	-2.34
3445004207	4	0	3	0	1	0	22.7	0	1	2	1	1	1	0	0	0	0	1	1	1	34450042	0	1	1	3	34450042	344500	0	-.91	-2.66	-2.24
3445004208	4	1	3	0	1	0	22.7	0	1	2	1	0	0	1	0	0	1	1	1	1	34450042	0	1	2	1	34450042	344500	0	-1.79	-1.66	-2.08
3445004208	4	0	3	1	1	1	22.6	0	1	2	0	1	1	0	0	1	0	1	1	0	34450042	0	1	1	3	34450042	344500	0	-1.6	-.98	-1.8
3445004209	4	1	3	0	1	1	24.4	0	1	1	0	1	0	0	0	0	0	1	1	0	34450042	0	1	2	3	34450042	344500	0	.46	-3.62	-1.74
3445004209	4	0	1	0	1	1	22.5	0	1	3	1	0	0	0	0	0	0	0	1	0	34450042	1	2	3	3	34450042	344500	0	-.65	-1.86	-1.41
3445004210	4	1	3	1	1	1	22.5	0	1	2	1	0	0	0	0	0	0	1	1	0	34450042	0	1	2	3	34450042	344500	0	-.23	-2.43	-1.4
3445004210	4	0	3	1	1	0	24.8	0	1	2	0	1	1	0	0	0	0	1	1	0	34450042	0	1	1	3	34450042	344500	0	-.83	-1.48	-1.34
3445004211	4	1	3	1	1	1	21.2	0	1	2	0	0	0	0	0	0	0	1	1	0	34450042	0	1	2	3	34450042	344500	0	-.85	-1.33	-1.26
3445004211	4	0	2	1	1	0	24.8	0	1	3	0	0	0	1	0	0	1	0	1	1	34450042	1	2	3	1	34450042	344500	0	.07	-1.75	-.91
3445004212	4	1	3	1	0	1	30.7	0	1	6	1	0	0	0	0	0	1	1	1	0	34450042	0	3	2	1	34450042	344500	0	.35	-1.8	-.63
3445004212	4	0	1	0	1	0	22.8	0	1	6	1	0	0	1	1	0	0	0	1	0	34450042	0	3	3	3	34450042	344500	0	-.1	-.84	-.49
3445004213	4	1	3	0	1	1	25.7	0	1	2	1	1	0	0	0	0	0	1	1	0	34450042	0	1	2	3	34450042	344500	0	1.05	-2.05	-.4
3445004213	4	0	3	0	1	0	23.9	0	1	4	1	1	0	1	1	0	0	1	1	0	34450042	0	2	3	3	34450042	344500	0	-.53	.34	-.11
3445004214	4	1	3	0	1	1	29.6	0	1	1	0	1	0	0	0	0	0	1	1	0	34450042	0	1	2	3	34450042	344500	0	2.78	-1.12	1.36
3445004214	4	0	3	0	0	0	28.9	0	1	4	0	0	0	0	0	0	0	0	1	0	34450042	0	2	3	3	34450042	344500	0	-3.2	-4.89	-4.54
3445004215	4	1	3	1	0	1	37.5	0	1	3	1	0	0	0	0	0	1	1	1	0	34450042	0	2	2	1	34450042	344500	0	-1.4	-3.28	-3.01
3445004215	4	0	3	0	0	0	29	0	1	3	1	1	1	0	0	0	0	1	1	1	34450042	1	2	1	3	34450042	344500	0	-.84	-3.5	-2.57
3445004216	4	1	3	1	1	1	24.4	0	1	6	0	0	0	0	0	0	1	1	1	0	34450042	0	3	2	1	34450042	344500	0	-.39	-1.58	-1.13
3445004216	4	0	3	0	1	0	22.8	0	1	4	1	0	1	1	1	0	0	0	1	0	34450042	0	2	1	3	34450042	344500	0	-1.1	-.69	-1.09
3445004301	4	1	3	0	1	1	22.9	0	1	2	1	1	1	0	0	0	0	1	0	0	34450043	1	1	1	3	34450043	344500	0	-.09	-1.63	-.93
3445004301	4	0	2	0	1	1	24.3	0	1	3	1	0	0	0	0	0	0	1	1	0	34450043	0	2	3	3	34450043	344500	0	.61	-1.93	-.77
3445004302	4	1	3	0	0	1	29.6	0	1	3	1	0	0	0	0	0	1	1	1	1	34450043	0	2	3	1	34450043	344500	0	-.04	-.95	-.67
3445004302	4	0	2	0	1	1	25.8	0	1	4	1	1	1	1	1	0	1	1	1	0	34450043	0	2	1	1	34450043	344500	0	.95	-2.84	-.65
3445004303	4	1	3	1	1	1	21.7	0	1	3	0	0	0	0	0	0	1	1	1	0	34450043	0	2	3	1	34450043	344500	0	.77	-1.98	-.62
3445004303	4	0	3	0	1	0	24	0	1	3	1	0	1	0	0	0	0	0	1	0	34450043	0	2	1	3	34450043	344500	0	.48	-1.54	-.42
3445004304	4	1	3	0	1	1	24.6	0	1	4	1	0	1	0	0	0	1	1	0	0	34450043	1	2	1	1	34450043	344500	0	-.38	-.03	-.28
3445004304	4	0	3	1	0	0	31.3	0	1	1	1	1	0	0	0	0	0	1	0	0	34450043	0	1	3	3	34450043	344500	0	-.39	.69	0
3445004305	4	1	2	0	0	1	32.8	0	1	3	1	0	0	0	0	0	1	1	1	0	34450043	0	2	3	1	34450043	344500	0	.57	-.76	.04
3445004305	4	0	2	0	1	0	22.7	0	1	2	0	0	0	0	0	0	0	1	1	0	34450043	0	1	3	3	34450043	344500	0	2.59	-2.71	.05
3445004306	4	1	3	1	1	1	23.2	0	1	1	0	1	1	0	0	0	0	1	1	0	34450043	0	1	1	2	34450043	344500	0	1.34	-1.05	.32
3445004306	4	0	3	0	0	1	30.1	0	1	2	1	1	1	0	0	1	0	1	1	0	34450043	0	1	1	3	34450043	344500	0	.14	1.96	1.09
3445004307	4	1	3	0	1	1	23.7	0	1	5	1	0	1	0	0	0	1	1	1	0	34450043	0	3	1	1	34450043	344500	0	-.45	-2.21	-1.52
3445004307	4	0	3	0	1	0	22.6	0	1	1	1	1	0	0	0	0	0	1	1	0	34450043	1	1	3	3	34450043	344500	0	-.14	-2.73	-1.43
3445004308	4	1	3	0	0	1	29.3	0	1	5	1	0	0	0	0	0	1	1	1	0	34450043	0	3	3	1	34450043	344500	0	-.74	-1.3	-1.16
3445004308	4	0	3	0	0	0	26.8	0	1	3	1	0	0	0	0	0	0	1	0	0	34450043	0	2	3	3	34450043	344500	0	-.42	-1.18	-1.15
3445004309	4	1	3	0	0	1	26.5	0	1	1	1	1	0	0	0	0	0	1	1	0	34450043	0	1	3	3	34450043	344500	0	-.75	-1.22	-1.12
3445004309	4	0	2	0	1	1	24.9	0	1	2	1	1	1	0	0	0	0	1	1	0	34450043	0	1	1	3	34450043	344500	0	.29	-1.92	-.87
3445004310	4	1	3	0	1	1	21.6	0	1	1	1	1	0	0	0	0	0	1	1	0	34450043	0	1	3	3	34450043	344500	0	-.27	-.91	-.63
3445004310	4	0	3	0	1	1	26.3	0	1	6	1	0	0	0	1	0	0	0	1	0	34450043	0	3	3	3	34450043	344500	0	-.11	-.75	-.44
3445004311	4	1	3	0	1	1	23.2	0	1	6	1	0	1	0	0	0	1	1	1	0	34450043	0	3	1	1	34450043	344500	0	.47	-1.38	-.39
3445004311	4	0	2	0	1	1	24.4	0	1	4	1	0	0	0	0	0	0	0	1	0	34450043	0	2	3	3	34450043	344500	0	.99	-1.75	-.15
3445004312	4	1	3	0	1	1	19.2	0	1	1	0	1	0	0	0	0	0	1	0	0	34450043	0	1	3	3	34450043	344500	0	-.12	.24	0
3445004312	4	0	1	1	1	1	22.3	0	1	1	0	1	0	0	0	0	0	1	1	0	34450043	0	1	3	3	34450043	344500	0	1.44	-1.94	.17
3445004313	4	1	3	1	0	1	32.6	0	1	2	1	0	0	0	0	0	0	1	0	1	34450043	0	1	3	3	34450043	344500	0	.15	.26	.21
3445004313	4	0	3	1	1	1	22.2	0	1	2	1	0	0	1	0	0	0	1	1	0	34450043	0	1	3	3	34450043	344500	0	1.48	-1.19	.34
3445004314	4	1	3	1	1	0	21.5	0	1	2	1	1	1	0	0	0	0	1	1	0	34450043	0	1	1	3	34450043	344500	0	.67	.66	.78
3445004314	4	0	1	0	1	1	27.8	0	1	2	0	1	1	1	0	0	0	1	0	0	34450043	0	1	1	3	34450043	344500	0	1.89	-.84	.97
3445004315	4	1	3	0	0	1	29.8	0	1	2	1	1	1	0	0	0	0	1	1	0	34450043	1	1	1	2	34450043	344500	0	-3.5	-4.58	-4.56
3445004315	4	0	3	0	1	0	25.9	0	1	3	1	0	0	0	0	0	0	1	1	0	34450043	0	2	3	3	34450043	344500	0	-4.43	-2.36	-4.23
3445004316	4	1	3	1	0	1	29.4	0	1	3	1	0	1	0	0	0	1	1	1	0	34450043	1	2	1	1	34450043	344500	0	.82	-4.26	-2.79
3445004316	4	0	2	0	1	1	25.5	0	1	4	1	0	0	1	1	1	0	0	1	0	34450043	1	2	3	3	34450043	344500	0	-.69	-2.96	-1.98
3445004317	4	0	3	0	0	1	26.6	0	1	3	1	0	0	0	0	0	0	1	1	0	34450043	0	2	3	3	34450043	344500	0	-.63	-1.64	-1.34
3445004401	4	1	3	0	0	0	31.4	0	1	6	1	0	0	0	0	0	1	1	1	0	34450044	0	3	3	1	34450044	344500	0	1.76	-3.43	-1.32
3445004401	4	0	1	0	1	1	23.8	0	1	4	1	0	0	0	1	1	0	1	1	0	34450044	0	2	2	3	34450044	344500	0	-.5	-.99	-.84
3445004402	4	1	3	1	1	1	22.3	0	1	3	1	0	1	0	0	0	1	1	1	0	34450044	0	2	1	1	34450044	344500	0	.95	-2.84	-.63
3445004402	4	0	2	0	1	1	22.6	0	1	2	0	1	0	0	0	0	0	1	1	0	34450044	0	1	2	3	34450044	344500	0	.88	-2.54	-.6
3445004403	4	1	3	1	1	1	23.9	1	1	2	0	1	0	0	0	0	0	1	0	0	34450044	0	1	3	2	34450044	344500	0	.77	-1.68	-.18
3445004403	4	0	1	0	1	1	24.3	0	1	1	0	1	0	0	0	0	0	1	1	0	34450044	0	1	2		34450044	344500	0	-.15	.09	-.02
3445004404	4	1	2	0	0	1	27.6	0	1	3	1	0	0	0	0	0	1	1	1	0	34450044	0	2	3	1	34450044	344500	0	3.33	-2.86	.33
3445004404	4	0	2	0	1	1	24.8	0	1	4	1	0	0	0	0	0	0	1	1	0	34450044	0	2	2	3	34450044	344500	0	.3	.75	.78
3445004405	4	1	3	1	0	1	28	0	1	3	1	0	1	0	0	0	0	1	1	0	34450044	0	2	1	3	34450044	344500	0	1.82	.1	1.38
3445004405	4	0	2	1	1	1	21.3	0	1	1	1	1	0	0	0	0	0	1	1	0	34450044	0	1	2	3	34450044	344500	0	3.61	-.28	2.57
3445004406	4	1	3	0	1	1	27.6	0	1	5	0	0	0	0	0	0	1	1	0	0	34450044	0	3	3	1	34450044	344500	0	-2.02	-3.25	-3.17
3445004406	4	0	3	0	0	0	30.7	0	1	2	0	1	0	0	0	0	0	1	1	0	34450044	0	1	2	3	34450044	344500	0	-1.44	-2.64	-2.49
3445004407	4	1	3	1	1	1	27.7	1	1	1	1	1	1	0	0	0	0	1	0	0	34450044	0	1	1	3	34450044	344500	0	-1.48	-2.54	-2.35
3445004407	4	0	3	1	1	1	25.2	0	1	4	1	0	0	0	0	0	0	1	1	0	34450044	0	2	2	3	34450044	344500	0	-.3	-3.83	-2.33
3445004408	4	1	2	0	1	1	22.8	0	1	5	1	0	0	0	0	0	1	1	1	0	34450044	0	3	3	1	34450044	344500	0	-2.73	-.81	-2.21
3445004408	4	0	2	0	0	1	27.9	0	1	2	1	1	0	0	0	0	0	1	1	1	34450044	0	1	2	3	34450044	344500	0	-.64	-3.22	-2.14
3445004409	4	1	2	0	0	1	28.7	0	1	1	0	1	1	0	0	0	0	1	1	1	34450044	0	1	1	3	34450044	344500	0	-1.38	-1.79	-2.13
3445004409	4	0	3	0	1	1	22.6	0	1	2	0	1	0	1	1	0	0	1	1	0	34450044	0	1	2	3	34450044	344500	0	-.42	-2.16	-1.32
3445004410	4	1	2	1	1	1	21.6	1	1	2	1	0	1	0	0	0	0	1	1	0	34450044	0	1	1	3	34450044	344500	0	-1.51	-.53	-1.31
3445004411	4	1	2	0	1	1	23.8	0	1	5	0	0	0	0	0	0	1	1	1	0	34450044	0	3	3	1	34450044	344500	0	.23	-2.37	-1.16
3445004412	4	1	2	0	0	1	30.4	0	1	1	1	1	1	0	0	0	0	1	0	0	34450044	1	1	1	3	34450044	344500	0	.56	-2.44	-1.01
3445004413	4	1	3	0	1	1	22.6	0	1	4	1	0	1	0	0	0	1	1	1	0	34450044	0	2	1	1	34450044	344500	0	.78	-2.45	-.82
3445004414	4	1	2	1	1	1	22.1	0	1	2	1	0	0	0	0	0	0	1	1	1	34450044	0	1	3	3	34450044	344500	0	-.2	-1.27	-.79
3445004415	4	1	3	0	1	1	23.3	0	1	4	0	0	0	0	0	0	1	1	1	0	34450044	0	2	3	1	34450044	344500	0	.53	-1.89	-.67
3445004416	4	1	3	1	1	1	22.1	0	1	2	0	1	1	0	0	0	0	1	1	0	34450044	0	1	1	3	34450044	344500	0	-.8	.15	-.58
3445004501	4	0	3	0	1	1	24.3	0	1	2	1	1	0	0	0	0	0	1	1	0	34450045	0	1	2	3	34450045	344500	0	.4	-.64	-.13
3445004502	4	0	3	0	0	0	26.6	0	1	3	1	0	0	0	0	0	0	0	1	1	34450045	1	2	2	3	34450045	344500	0	-.97		-4.75
3445004503	4	0	2	1	0	1	34.5	1	1	4	1	0	0	0	0	0	0	1	1	0	34450045	0	2	2	3	34450045	344500	0	-1.43	-2.83	-2.47
3445004504	4	0	2	1	1	1	23.4	0	1	2	1	1	0	0	0	0	0	1	0	0	34450045	1	1	2	3	34450045	344500	0	-1.09	-3.18	-2.35
3445004505	4	0	3	0	0	1	27.2	0	1	2	1	1	0	0	0	0	0	1	0	0	34450045	1	1	2	3	34450045	344500	0	-.86	-2.21	-2.33
3445004506	4	0	1	0	0	0	29.8	0	1	4	1	0	0	0	0	0	0	1	1	1	34450045	0	2	2	3	34450045	344500	0	-.97	-1.83	-2.15
3445004507	4	0	2	0	0	1	34	0	1	3	0	0	0	0	0	0	0	1	0	0	34450045	0	2	2	3	34450045	344500	0	1.19	-3.46	-1.8
3445004508	4	0	3	0	0	0	27.4	0	1	3	1	0	0	0	0	0	0	0	1	0	34450045	0	2	2	3	34450045	344500	0	.23	-2.69	-1.72
3445005101	4	1	2	1	1	1	27.4	0	1	4	1	0	0	0	0	0	1	1	0	0	34450051	1	2	2	1	34450051	344500	0	.91	-3.65	-1.12
3445005101	4	0	3	1	1	1	21.8	0	1	2	0	1	0	0	0	0	0	1	1	0	34450051	0	1	3	3	34450051	344500	0	2.29	-5.02	-.96
3445005102	4	1	3	1	1	0	23.5	0	1	3	1	0	0	0	0	0	0	1	1	0	34450051	0	2	2	2	34450051	344500	0	1.16	-3.65	-.93
3445005102	4	0	2	0	1	0	24.8	0	1	5	0	0	0	0	0	0	0	1	1	1	34450051	0	3	3	3	34450051	344500	0	-1.1	-.09	-.77
3445005103	4	1	3	1	0	0	28	0	1	1	1	1	0	0	0	0	0	1	0	0	34450051	0	1	2	2	34450051	344500	0	.12	-1.37	-.52
3445005103	4	0	2	1	1	1	27.7	0	1	4	1	0	0	1	0	0	0	1	1	1	34450051	0	2	3	3	34450051	344500	0			-.34
3445005104	4	1	3	1	1	1	22.8	0	1	1	1	1	0	0	0	0	0	1	1	0	34450051	0	1	2	2	34450051	344500	0	3.53	-2.99	.7
3445005104	4	0	3	0	1	0	20	0	1	3	0	1	1	0	1	0	0	1	1	0	34450051	0	2	1	3	34450051	344500	0	2.82	-2.03	.76
3445005105	4	1	2	1	1	1	27	0	1	3	1	0	0	0	0	0	1	1	1	0	34450051	0	2	2	1	34450051	344500	0	-3.21	-3.61	-4.13
3445005105	4	0	3	0	1	1	24.6	0	1	5	0	0	0	0	1	0	0	1	1	0	34450051	0	3	3	3	34450051	344500	0	-2.24	-1.84	-2.52
3445005106	4	1	3	0	1	1	24.2	0	1	5	0	0	0	0	0	1	1	1	1	0	34450051	1	3	2	1	34450051	344500	0	-1.01	-3.37	-2.47
3445005106	4	0	1	0	1	0	19.9	0	1	1	1	1	1	0	0	0	0	1	1	0	34450051	1	1	1		34450051	344500	0	-1.98	-1.49	-2.17
3445005107	4	1	3	1	1	1	26.8	1	1	5	0	0	0	0	0	0	1	1	0	0	34450051	0	3	2	1	34450051	344500	0	-.76	-2.87	-2.02
3445005107	4	0	3	0	1	1	23.7	0	1	2	1	1	1	0	0	0	0	1	1	0	34450051	0	1	1	3	34450051	344500	0	-1.15	-1.19	-1.71
3445005108	4	1	3	0	0	1	34.2	0	1	1	0	1	0	0	0	0	0	1	0	0	34450051	1	1	2	3	34450051	344500	0	.49	-3.3	-1.65
3445005108	4	0	3	0	1	1	25.6	0	1	5	1	0	1	0	0	0	0	0	1	0	34450051	0	3	1	2	34450051	344500	0	-.66	-2.09	-1.59
3445005109	4	1	3	0	0	1	27.4	0	1	3	1	0	0	0	1	1	0	1	1	0	34450051	0	2	2	3	34450051	344500	0	.26	-2.15	-1.31
3445005109	4	0	2	0	1	1	25.9	0	1	6	1	0	0	0	0	0	1	1	1	0	34450051	0	3	3	1	34450051	344500	0	-4.02	3.31	-1.14
3445005110	4	1	3	0	1	1	26.1	0	1	4	0	0	0	0	0	0	1	1	1	0	34450051	0	2	2	1	34450051	344500	0	.05	-1.68	-.93
3445005110	4	0	2	0	1	0	25	0	1	3	1	0	1	1	1	0	0	1	1	0	34450051	0	2	1	3	34450051	344500	0	-1.1	.49	-.61
3445005111	4	1	3	1	1	1	19.3	0	1	4	0	1	0	1	1	0	0	1	1	0	34450051	0	2	2	3	34450051	344500	0	-.12	.45	.24
3445005111	4	0	3	1	1	1	24.4	0	1	6	1	0	0	0	1	0	0	1	1	0	34450051	0	3	3	3	34450051	344500	0	-4.21		.24
3445005112	4	1	3	1	0	1	30.1	0	1	1	0	1	0	0	0	0	0	1	1	0	34450051	0	1	2	3	34450051	344500	0	.82	-.22	.49
3445005112	4	0	1	0	1	1	26.1	0	1	6	1	0	1	0	0	0	0	1	1	0	34450051	0	3	1	3	34450051	344500	0		-1.07	4.34
3445005113	4	1	3	1	1	1	23.8	0	1	4	1	0	0	0	0	0	1	1	1	0	34450051	1	2	2	1	34450051	344500	0	-3.62	-2.39	-3.66
3445005113	4	0	3	0	1	0	25	0	1	6	1	0	1	0	0	0	0	1	1	0	34450051	0	3	1	3	34450051	344500	0	-2.25	-3.2	-3.33
3445005114	4	1	3	0	1	1	22.8	0	1	4	1	0	0	1	1	0	1	1	1	0	34450051	1	2	2	1	34450051	344500	0	-1.7	-3.25	-2.94
3445005114	4	0	3	0	1	0	26.5	0	1	5	1	0	0	1	0	0	0	1	1	0	34450051	1	3	3	3	34450051	344500	0	-2.24	-1.98	-2.62
3445005115	4	1	3	1	1	1	20.7	0	1	1	0	1	0	0			0	1	1	0	34450051	0	1	2	2	34450051	344500	0	-1.61	-2.27	-2.43
3445005115	4	0	2	1	1	1	29.1	0	1	1	1	1	0	0	0	0	0	1	1	0	34450051	0	1	3	3	34450051	344500	0	-.55	-3.59	-2.26
3445005116	4	1	2	1	1	1	23.4	0	1	4	0	0	0	0	0	0	1	1	1	0	34450051	0	2	2	1	34450051	344500	0	-.77	-2.71	-1.9
3445005116	4	0	3	1	0	1	29.8	0	1	3	1	1	0	1	1	0	0	1	1	0	34450051	0	2	3	3	34450051	344500	0	-.77	-2.55	-1.81
3445005117	4	0	3	1	1	0	24	0	1	5	1	0	0	0	1	0	0	1	1	0	34450051	0	3	3	3	34450051	344500	0	-.8	-2.02	-1.63
3445005201	4	1	3	1	1	1	23.3	0	1	3	1	0	0	0	0	0	1	0	1	1	34450052	0	2	3	1	34450052	344500	0	.12	-3.31	-1.6
3445005201	4	0	3	0	0	0	31.8	0	1	5	1	0	0	1	1	1	0	1	1	0	34450052	0	3	2	3	34450052	344500	0	-.98	-1.49	-1.49
3445005202	4	1	3	0	0	1	29	0	1	4	1	0	0	0	1	1	1	1	1	0	34450052	0	2	3	1	34450052	344500	0	.4	-2.64	-1.19
3445005202	4	0	3	0	0	1	25.9	0	1	2	1	1	0	0	0	0	0	1	1	0	34450052	0	1	2	3	34450052	344500	0	.24	-2.24	-1.08
3445005203	4	1	3	0	1	1	22.3	0	1	1	0	1	0	1	0	0	0	1	1	0	34450052	0	1	3	3	34450052	344500	0	-.04	-1.43	-.97
3445005203	4	0	3	0	1	1	24.7	0	1	5	1	0	0	0	0	0	1	1	1	0	34450052	1	3	2	1	34450052	344500	0			-.91
3445005204	4	1	3	0	0	1	31.4	0	1	2	1	0	1	0	0	0	0	1	1	0	34450052	0	1	1	3	34450052	344500	0	-1.57	1.13	.01
3445005204	4	0	2	0	0	1	29.4	0	1	3	1	1	0	0	0	0	0	1	1	0	34450052	0	2	2	3	34450052	344500	0	-.77	-2.72	-1.92
3445005206	4	1	3	1	1	1	21.7	0	1	1	0	1	0	0	0	0	0	1	1	0	34450052	0	1	3	3	34450052	344500	0	-.68	-2.66	-1.77
3445005206	4	0	2	0	0	0	30.8	0	1	5	0	0	0	0	1	0	0	1	1	0	34450052	0	3	2	3	34450052	344500	0	-1.43	-.83	-1.46
3445005207	4	1	3	1	1	1	24.3	0	1	4	1	0	1	0	0	0	1	1	1	0	34450052	0	2	1	1	34450052	344500	0	-.84	-1.26	-1.27
3445005207	4	0	3	0	1	0	24.1	0	1	6	1	0	0	0	0	0	0	1	1	0	34450052	0	3	2	3	34450052	344500	0	-.23	-1.03	-1.13
3445005208	4	1	3	0	1	1	29.3	0	1	6	1	0	1	0	0	1	1	1	0	0	34450052	0	3	1	1	34450052	344500	0	-.48	-1.06	-1
3445005208	4	0	2	1	1	1	24.3	0	1	1	1	1	0	1	0	0	0	1	1	0	34450052	0	1	2	3	34450052	344500	0	-.72	-.49	-.88
3445005209	4	1	3	1	0	1	27.9	0	1	2	1	0	1	0	0	0	0	1	1	1	34450052	0	1	1	3	34450052	344500	0	-.49	-.92	-.81
3445005209	4	0	3	0	1	0	23.1	0	1	4	0	0	0	0	1	1	0	1	1	0	34450052	0	2	2	3	34450052	344500	0	-.05	-1.08	-.78
3445005210	4	1	3	1	1	1	26.3	0	1	5	1	0	1	0	0	0	1	1	1	0	34450052	0	3	1	1	34450052	344500	0	-.77	-.45	-.77
3445005210	4	0	3	0	1	0	23.8	0	1	6	0	0	0	0	0	0	0	1	1	0	34450052	0	3	2	3	34450052	344500	0	-.31	-.91	-.7
3445005211	4	1	3	0	1	1	27.4	0	1	4	0	0	0	0	0	0	0	1	1	0	34450052	0	2	3	3	34450052	344500	0	-.53	-.62	-.67
3445005211	4	0	3	0	1	0	23.5	0	1	4	1	0	0	0	1	0	0	1	1	1	34450052	0	2	2	3	34450052	344500	0	-.66	-.1	-.53
3445005212	4	1	3	0	0	1	30.8	0	1	1	1	1	1	0	0	0	0	1	1	0	34450052	0	1	1	3	34450052	344500	0	-.32	-.41	-.52
3445005212	4	0	3	0	0	1	25.1	0	1	1	1	1	0	0	0	0	0	1	1	0	34450052	0	1	2	3	34450052	344500	0	-.23	-.67	-.5
3445005213	4	1	3	0	1	1	21.8	0	1	1	0	1	0	0	0	0	0	1	1	0	34450052	0	1	3	3	34450052	344500	0	1.05	-.57	.39
3445005213	4	0	2	0	1	0	25.8	0	1	6	1	0	0	0	1	1	0	1	1	0	34450052	1	3	2	3	34450052	344500	0	-2.57	-3.05	-3.43
3445005214	4	1	3	1	1	1	28	0	1	5	1	0	0	0	0	0	1	1	1	0	34450052	0	3	3	1	34450052	344500	0	-.64	-4.37	-2.79
3445005214	4	0	3	0	0	0	30.4	0	1	6	1	0	0	0	0	0	0	1	1	1	34450052	1	3	2	3	34450052	344500	0	-1.65	-2.41	-2.6
3445005215	4	1	3	1	1	1	25.3	0	1	1	0	1	1	0	0	0	0	0	1	0	34450052	0	1	1	3	34450052	344500	0	.23	-2.62	-1.68
3445005215	4	0	2	1	1	0	27.5	0	1	4	0	0	0	1	0	0	0	1	1	0	34450052	0	2	2	3	34450052	344500	0	-1.9	-.65	-1.67
3445005216	4	1	3	0	1	1	21	0	1	1	1	1	1	1	1	0	0	1	1	0	34450052	1	1	1	3	34450052	344500	0	1.02	-2.62	-1.51
3445005216	4	0	3	1	1	0	25.8	0	1	6	1	0	0	0	0	0	0	1	1	0	34450052	0	3	2	3	34450052	344500	0	.39	-2.49	-1.34
3445005217	4	0	3	1	0	0	39.2	0	1	4	0	0	0	0	0	0	0	1	1	0	34450052	1	2	2	3	34450052	344500	0	.78	-2.85	-1.19
3445005218	4	0	3	0	1	0	23.9	0	1	1	1	1	0	0	0	0	0	1	1	0	34450052	0	1	2	3	34450052	344500	0	-1.29	-.02	-.85
3445005219	4	0	3	0	1	0	24.5	0	1	6	1	0	0	0	1	1	1	1	1	0	34450052	0	3	2	1	34450052	344500	0	-.47	-.86	-.74
3445005220	4	0	2	1	1	1	22.8	0	1	1	1	1	0	0	0	0	0	1	1	0	34450052	0	1	2		34450052	344500	0	1.52	-2.42	-.71
3445005221	4	0	3	0	1	0	23.8	0	1	4	0	0	0	1	0	0	0	1	1	0	34450052	0	2	2	3	34450052	344500	0	-.14	-1.07	-.59
3445005222	4	0	3	0	1	0	24	0	1	6	1	0	0	0	0	0	1	1	0	0	34450052	0	3	2	1	34450052	344500	0	1.82	-1.91	-.03
3445005223	4	0	3	1	1	0	25.5	0	1	2	1	1	0	1	1	0	0	1	1	0	34450052	0	1	2	3	34450052	344500	0	1.42	.65	1.39
3445005224	4	0	2	0	1	0	27.3	0	1	4	1	0	0	1	1	0	0	1	1	0	34450052	1	2	2	3	34450052	344500	0	3.51	-.62	2.2
3445005225	4	0	3	0	0	0	28.1	0	1	3	1	0	0	0	0	0	1	1	1	0	34450052	0	2	2	1	34450052	344500	0		-2.77	3.79
3445005226	4	0	2	1	0	0	31.4	0	1	3	1	1	0	0	0	0	0	0	1	0	34450052	1	2	2	3	34450052	344500	0	-2.85	-1.03	-2.59
3445005301	4	1	3	0	1	1	24	0	1	2	1	0	0	0	0	0	0	1	1	0	34450053	0	1	2	3	34450053	344500	0	-1.98	-1.93	-2.46
3445005301	4	0	3	0	1	1	23.8	0	1	2	0	1	0	0	0	0	0	1	1	0	34450053	0	1	2	3	34450053	344500	0	-1.61	-2.43	-2.33
3445005302	4	1	3	0	1	1	23.8	0	1	2	1	1	0	0	0	0	0	1	0	1	34450053	0	1	2	3	34450053	344500	0	-2.16	-1.1	-2.17
3445005303	4	1	3	0	1	1	27.3	0	1	5	1	0	0	0	0	0	1	1	0	0	34450053	0	3	2	1	34450053	344500	0	-1.42	-1.46	-1.93
3445005303	4	0	3	1	1	1	24.3	0	1	2	0	1	0	0	0	0	0	1	1	0	34450053	0	1	2	3	34450053	344500	0	-2.81	.26	-1.93
3445005304	4	1	3	0	0	1	32.3	0	1	4	1	0	0	0	0	0	1	1	1	0	34450053	0	2	2	1	34450053	344500	0	-2.08	-.64	-1.8
3445005304	4	0	2	0	1	1	24.3	0	1	5	1	0	0	0	0	0	1	0	1	0	34450053	0	3	2	1	34450053	344500	0	-1.29	-.84	-1.33
3445005305	4	1	3	1	0	1	28.9	0	1	2	1	1	0		0		0	1	1	1	34450053	0	1	2	3	34450053	344500	0	-1.52	-.43	-1.3
3445005305	4	0	3	1	1	1	23.6	0	1	1	1	1	0	0	0	0	0	1	1	0	34450053	0	1	2	3	34450053	344500	0	-2.01	.43	-1.3
3445005306	4	1	2	0	0	1	32	0	1	1	1	1	0	0	0	0	0	1	1	0	34450053	0	1	2	3	34450053	344500	0	-.54	-1.48	-1.18
3445005306	4	0	3	1	1	1	23.8	0	1	1	0	1	0	0	0	0	0	0	1	0	34450053	0	1	2	3	34450053	344500	0	-.63	-.74	-.81
3445005307	4	0	2	0	0	0	29.9	0	1	2	1	1	0	0	0	0	0	0	1	0	34450053	0	1	2	3	34450053	344500	0	-1.48	.31	-.74
3445005308	4	1	1	1	0	1	29	0	1	1	1	1	0	0	0	0	0	1	0	0	34450053	0	1	2	2	34450053	344500	0	-.73	.02	-.57
3445005309	4	1	1	1	1	1	22.3	0	1	1	1	1	0	1	1	0	0	1	0	0	34450053	0	1	2	2	34450053	344500	0	-1.05	.51	-.57
3445005311	4	1	3	1	1	1	20.8	1	1	5	1	0	0	0	0	1	1	1	1	0	34450053	0	3	2	1	34450053	344500	0	-.96	.26	-.56
3445005312	4	1	3	0	1	1	18.8	0	1	1	0	1	0	0	0	0	0	1	1	0	34450053	0	1	2	3	34450053	344500	0	-1.86	-3.28	-3.18
3445005313	4	1	2	1	1	1	28.2	1	1	5	1	0	0	0	0	0	1	1	1	0	34450053	0	3	2	1	34450053	344500	0	-2.39	-2.77	-3.16
3445005314	4	1	3	0	0	1	29.7	0	1	3	1	0	0	0	0	0	1	1	1	0	34450053	0	2	2	1	34450053	344500	0	-1.98	-2.01	-2.46
3445005315	4	1	3	1	1	1	25.1	0	1	2	0	1	0	0	0	0	0	1	1	0	34450053	1	1	2	2	34450053	344500	0	-.86	-3.18	-2.21
3445005316	4	1	3	0	0	1	30.7	0	1	4	1	0	0	0	0	0	1	1	1	0	34450053	1	2	2	1	34450053	344500	0	-.19	-2.8	-1.75
3445005401	4	1	2	1	1	1	21.7	0	1	4	0	0	1	0	0	0	1	1	1	0	34450054	0	2	1	1	34450054	344500	0	2.9		-1.74
3445005401	4	0	1	0	0	0	31.2	0	1	4	1	0	0	0	0	0	0	0	1	0	34450054	1	2	3	3	34450054	344500	0	.25	-2.94	-1.44
3445005402	4	1	2	1	1	1	28.4	1	1	3	1	0	1	0	0	0	1	1	1	0	34450054	0	2	1	1	34450054	344500	0	-.19	-1.88	-1.15
3445005402	4	0	3	0	1	1	19.8	0	1	1	1	1	1	0	0	0	0	1	0	0	34450054	0	1	1		34450054	344500	0	-.39	-1.43	-.99
3445005403	4	1	3	0	0	1	28.9	0	1	1	1	1	0	0	0	0	0	1	1	0	34450054	0	1	3	3	34450054	344500	0	1.31	-2.56	-.79
3445005403	4	0	2	0	0	0	28.5	0	1	2	0	1	1	0	0	0	0	0	1	0	34450054	1	1	1	3	34450054	344500	0	1.04	-2.82	-.61
3445005404	4	1	3	0	0	1	30.8	0	1	5	1	0	1	0	0	0	1	1	1	0	34450054	1	3	1	1	34450054	344500	0	-1.32	1.06	-.56
3445005404	4	0	3	0	0	0	28.3	0	1	1	1	1	0	1	0	0	0	0	1	0	34450054	0	1	3	3	34450054	344500	0	1.64	-1.67	.1
3445005405	4	1	2	0	0	1	25.8	0	1	1	0	1	0	0	0	0	0	1	1	0	34450054	0	1	3	2	34450054	344500	0	2.4	-2.75	.13
3445005405	4	0	2	0	1	1	23.9	0	1	4	1	0	0	0	0	0	1	0	1	0	34450054	0	2	3	1	34450054	344500	0	3.11	-2.92	.22
3445005406	4	1	2	0	1	1	23.6	1	1	5	1	0	0	0	0	0	1	1	1	0	34450054	0	3	3	1	34450054	344500	0		.69
3445005406	4	0	3	1	1	1	25.7	0	1	4	1	0	0	0	0	0	1	0	1	0	34450054	0	2	3	1	34450054	344500	0	-1.83	-1.63	-2.21
3445005407	4	1	3	0	0	1	26.9	0	1	2	1	0	1	0	0	0	0	1	0	0	34450054	1	1	1	3	34450054	344500	0	-2.38	-.68	-2.05
3445005407	4	0	3	1	1	1	25.2	0	1	4	1	0	0	0	0	0	0	1	0	0	34450054	0	2	3	3	34450054	344500	0	-2.51	.09	-1.65
3445005408	4	1	3	1	1	1	21.8	0	1	1	1	1	1	0	0	0	0	1	1	0	34450054	0	1	1	2	34450054	344500	0	-2.06	.03	-1.53
3445005408	4	0	1	1	1	0	28	0	1	4	0	0	1	1	1	1	1	0	1	0	34450054	1	2	1	1	34450054	344500	0	-2.31	.06	-1.51
3445005409	4	1	3	0	0	1	32	0	1	5	1	0	1	0	0	0	1	1	1	0	34450054	0	3	1	1	34450054	344500	0	1.69	-4.78	-1.26
3445005409	4	0	1	0	0	1	33.4	0	1	4	1	0	1	0	0	0	0	0	1	0	34450054	0	2	1	3	34450054	344500	0	-.95	-1.09	-1.19
3445005410	4	1	2	0	0	1	28.7	0	1	5	1	0	1	1	0	0	1	1	1	0	34450054	0	3	1	1	34450054	344500	0	-1.15	.17	-.8
3445005410	4	0	2	0	0	0	30.1	0	1	6	0	0	0	0	1	1	0	1	1	0	34450054	1	3	3	3	34450054	344500	0	-1.13	.17	-.69
3445005411	4	1	3	0	1	1	23.3	0	1	2	1	1	1	0	0	0	1	1	1	0	34450054	0	1	1	1	34450054	344500	0	-.74	-.29	-.66
3445005411	4	0	2	0	1	0	26.3	0	1	4	1	1	0	1	0	0	0	1	1	1	34450054	1	2	3	3	34450054	344500	0	-.74	.14	-.45
3445005412	4	1	3	0	0	1	27.4	0	1	3	1	0	1	0	0	0	0	1	1	0	34450054	0	2	1	3	34450054	344500	0	.17	-.68	-.19
3445005412	4	0	3	1	1	1	22.8	0	1	4	0	0	0	1	1	0	1	1	1	0	34450054	1	2	3	1	34450054	344500	0	.15	.8	.47
3445005413	4	1	3	0	1	1	23.1	0	1	1	1	1	0	0	0	0	0	1	1	0	34450054	0	1	3	2	34450054	344500	0	.74	.17	.6
3445005413	4	0	3	0	0	0	25.7	0	1	4	1	0	0	0	1	1	0	1	0	1	34450054	1	2	3	3	34450054	344500	0	.61	.61	.74
3445005414	4	1	3	0	0	1	33.8	0	1	3	1	0	1	0	0	0	1	1	1	0	34450054	0	2	1	1	34450054	344500	0
3445005414	4	0	1	0	0	0	29.7	0	1	2	1	1	0	0	0	0	0	1	0	0	34450054	0	1	3	3	34450054	344500	0	-3.06	.1	-2.17
3445005415	4	1	3	0	0	1	30.8	0	1	1	0	1	1	0	0	0	0	1	1	0	34450054	0	1	1	3	34450054	344500	0	-1.67	-.78	-1.58
3445005416	4	1	3	0	1	1	21.8	0	1	2	0	0	1	0	0	0	0	1	1	0	34450054	0	1	1	3	34450054	344500	0	-1.11	-1.3	-1.48
4025001101	10	1	2	1	0	1	32.3	0	1	3	0	0	1	0	0	0	1	1	0	0	40250011	0	2	1	1	40250011	402500	0	-1.59	-.01	-1.16
4025001102	10	1	1	0	1	1		0	1	3	0	0	0	0	0	0	1	0	0	0	40250011	0	2	3	1	40250011	402500	0	-.81	-1.03	-1.11
4025001103	10	1	1	0	1	1	24.3	0	1	1	1	1	0	0	0	0	0	1	0	0	40250011	0	1	3	3	40250011	402500	0	-.38	-1.12	-.85
4025001105	10	1	3	1	1	1	24.1	0	1	2	1	1	1	0	0	0	1	1	1	0	40250011	1	1	1	1	40250011	402500	0	-1.3	.62	-.67
4025001106	10	1	2	0	1	1	21.6	0	0	3	0	0	0	0	0	0	1	1	1	0	40250011	1	2	3	1	40250011	402500	0	-.04	-.29	-.23
4025001107	10	1	2	0	1	1	29.5	0	0	4	1	0	0	0	0	0	1	1	0	0	40250011	1	2	3	1	40250011	402500	0	-.55	.44	-.18
4025001108	10	1	1	1	1	1	25.3	0	1	1	1	1	1	0	0	0	0	1	0	1	40250011	0	1	1	3	40250011	402500	0	.25	-.53	-.09
4025001109	10	1	1	0	1	1		0	1	6	1	0	1	0	0	0	1	0	0	0	40250011	0	3	1	1	40250011	402500	0	-.22	.21	-.05
4025001110	10	1	1	0	1	1		0	1	6	0	1	0	0	0	0	0	0	0	0	40250011	0	3	3	2	40250011	402500	0	-.25	.38	-.04
4025001112	10	1	1	1	1	1	37.3	0	1	4	1	0	0	0	0	0	1	1	1	0	40250011	0	2	3	1	40250011	402500	0	.49	-.38	.15
4025001113	10	1	1	1	0	1	25.6	0	1	4	0	0	0	0	0	0	1	1	1	0	40250011	0	2	3	1	40250011	402500	0	.39	.43	.46
4025001114	10	1	1	0	1	1		0	1	5	1	0	0	0	0	0	1	0	0	0	40250011	1	3	3	1	40250011	402500	0	.84	1.63	1.56
4025001115	10	1	1	1	1	1	21.7	1	1	2	0	1	0	0	0	0	0	1	1	0	40250011	0	1	3	3	40250011	402500	0	-1.64	-3.16	-2.92
4025001116	10	1	1	1	0	1	38.6	0	1	2	1	1	1	0	0	0	1	1	0	0	40250011	0	1	1	1	40250011	402500	0	-2.35	-2.36	-2.89
4025001117	10	1	1	0	1	0		0	0	4	1	1	0	0	0	0	0	0	0	0	40250011	0	2	3	2	40250011	402500	0	-2.32	-2.09	-2.75
4025001118	10	1	2	0	1	1	24.3	1	1	2	0	1	0	0	0	0	1	1	1	0	40250011	1	1	3	1	40250011	402500	0	-3.49	-.6	-2.59
4025641101	10	0	1	1	1	1	22.2	0	1	1	0	1	1	0	0	0	0	1	1	0	40250011	0	1	1	3	40250011	402500	0	-2.23	.49	-1.3
4025641102	10	0	2	1	1	1	22.9	0	1	5	0	0	0	1	1	0	0	1	1	0	40250011	0	3	3	3	40250011	402500	0	-.84	-.85	-1
4025641103	10	0	2	1	1	1	25.8	0	1	2	0	0	1	0	0	0	0	1	1	0	40250011	0	1	1	3	40250011	402500	0	.05	-.73	-.44
4025641104	10	0	3	1	1	1	22.3	0	1	2	1	0	1	1	1	0	0	1	1	0	40250011	0	1	1	3	40250011	402500	0	-.54	.37	-.25
4025641105	10	0	3	1	1	1	26.2	0	1	4	0	0	1	0	0	1	0	1	1	0	40250011	0	2	1	3	40250011	402500	0	-.86	1.46	.01
4025641106	10	0	3	0	0	1	28.8	1	1	3	0	0	1	0	0	0	0	1	1	1	40250011	1	2	1	3	40250011	402500	0	1.15	-.94	.25
4025641107	10	0	3	1	1	1	22.9	1	1	2	0	0	1	1	0	0	0	1	1	0	40250011	0	1	1	3	40250011	402500	0	-.05	.8	.37
4025641108	10	0	2	0	1	1	27.2	0	1	3	0	0	1	0	0	0	0	1	1	0	40250011	0	2	1	3	40250011	402500	0	1.01	-.44	.43
4025641109	10	0	1	0	1	1	26.4	0	1	4	0	0	1	0	0	0	0	1	1	0	40250011	0	2	1	3	40250011	402500	0	1.73	-.53	.77
4025641110	10	0	2	1	1	1	23.4	0	1	4	1	0	0	0	0	0	0	1	1	0	40250011	1	2	2	3	40250011	402500	0	.37	1.33	.89
4025641111	10	0	3	0	1	1	24.8	0	1	4	1	0	0	0	0	0	0	1	1	0	40250011	0	2	3	3	40250011	402500	0	1.18	1.05	1.33
4025641112	10	0	2	1	1	1	26.9	0	1	4	1	0	1	0	0	0	0	1	1	1	40250011	1	2	1	3	40250011	402500	0	2.4	.86	2.3
4025641113	10	0	2	0	1	1	26.6	0	1	4	1	0	0	0	0	0	0	1	1	0	40250011	0	2	3	3	40250011	402500	0	-1.51	-2.19	-2.53
4025641114	10	0	3	1	1	1	22.6	0	1	2	0	1	1	0	0	0	0	1	0	1	40250011	0	1	1	3	40250011	402500	0	-2.01	-1.58	-2.25
4025641115	10	0	3	0	1	0	22.4	1	1	3	1	0	0	0	0	0	0	1	1	0	40250011	0	2	3	3	40250011	402500	0	-1.74	-1.97	-2.22
4025641116	10	0	3	0	1	0	27	1	1	5	0	0	0	0	0	0	0	1	1	0	40250011	0	3	3	3	40250011	402500	0	-.73	-1.7	-1.4
4025641117	10	0	3	0	1	1	30	1	1	6	0	0	1	0	0	0	0	1	0	0	40250011	0	3	1	3	40250011	402500	0	-1.53	-.32	-1.26
4025641118	10	0	2	1	1	1	23.8	0	1	2	1	1	0	0	0	1	0	1	1	0	40250011	0	1	3	3	40250011	402500	0	-.68	-1.34	-1.11
4025001201	10	1	2	0	1	1	35.6	0	1	5	1	0	0	0	0	0	1	0	0	0	40250012	0	3	3	1	40250012	402500	0	-1.24	-.5	-1.1
4025001202	10	1	1	1	0	1	30.1	0	0	3	0	0	1	0	0	0	1	1	1	0	40250012	0	2	1	1	40250012	402500	0	-.61	-.75	-.98
4025001203	10	1	3	1	1	1	23.5	1	1	1	1	1	0	0	0	0	0	1	1	0	40250012	0	1	3	3	40250012	402500	0	-.51	-.95	-.85
4025001204	10	1	3	0	1	1		0	1	6	0	0	0	0	0	0	1	0	0	0	40250012	1	3	3	1	40250012	402500	0	.07	-.94	-.45
4025001205	10	1	1	0	1	1		0	1	6	0	0	0	1	0	0	1	0	0	0	40250012	0	3	3	1	40250012	402500	0	.71	-1.74	-.43
4025001206	10	1	1	0	1	1	24.9	0	1	2	1	1	1	0	0	0	1	1	1	0	40250012	1	1	1	1	40250012	402500	0	-.22	.05	-.18
4025001207	10	1	1	1	1	1		0	1	6	0	0	0	0	0	0	1	0	0	0	40250012	0	3	3	1	40250012	402500	0	.55	-1	-.11
4025001208	10	1	1	0	1	1		0	1	6	1	0	1	0	0	0	1	0	0	1	40250012	0	3	1	1	40250012	402500	0	.86	-.55	.31
4025001209	10	1	1	1	1	1		0	1	5	1	0	0	0	0	0	1	0	0	0	40250012	1	3	3	1	40250012	402500	0	.56	.46	.64
4025001210	10	1	1	0	1	1		0	1	6	0	0	0	0	0	0	1	0	0	0	40250012	1	3	3	1	40250012	402500	0	.62	.69	.78
4025001211	10	1	1	1	0	1	21.6	0	1	4	1	0	0	0	0	0	1	0	0	0	40250012	0	2	3	1	40250012	402500	0	-2.94	-2.23	-3.31
4025001212	10	1	1	0	1	1		0	1	5	0	0	0	0	0	0	0	1	0	0	40250012	0	3	3	2	40250012	402500	0	-2.91	-.42	-2.4
4025001213	10	1	1	0	1	1		0	1	6	0	0	0	0	0	0	1	0	0	0	40250012	0	3	3	1	40250012	402500	0	-2	-1.26	-2.07
4025001214	10	1	1	0	1	1		0	1	3	1	0	0	0	0	0	1	0	0	0	40250012	0	2	3	1	40250012	402500	0	-.44	-1.86	-1.74
4025001215	10	1	1	0	1	1		0	1	6	0	0	1	0	0	0	1	0	0	0	40250012	1	3	1	1	40250012	402500	0	.26	-1.61	-.67
4025001216	10	1	1	0	1	1		0	1	6	0	0	0	0	0	0	1	0	0	0	40250012	1	3	3	1	40250012	402500	0	-.06	-.36	-.18
4025641201	10	0	3	1	1	1	21.4	0	1	3	1	0	0	0	0	0	0	1	0	0	40250012	1	2	3	3	40250012	402500	0	-.08	.26	.06
4025641202	10	0	2	0	1	1	26.9	0	1	2	0	0	0	0	0	0	0	1	1	0	40250012	1	1	3	3	40250012	402500	0	.71	-.19	.31
4025641203	10	0	3	0	1	1	24.8	1	1	1	1	1	0	0	0	0	0	1	1	0	40250012	0	1	3	3	40250012	402500	0	.87	-.7	.34
4025641204	10	0	2	1	0	1	29.6	0	1	1	1	1	0	0	0	0	0	1	1	0	40250012	0	1	3	3	40250012	402500	0	1.79	-1.72	.36
4025641205	10	0	3	1	0	1	28.8	0	1	5	1	0	0	0	0	0	0	1	0	0	40250012	0	3	3	3	40250012	402500	0	.93	.17	.76
4025641206	10	0	3	1	1	1	25.2	0	1	3	1	0	1	1	1	0	0	1	1	0	40250012	0	2	1	3	40250012	402500	0			1.04
4025641207	10	0	3	0	1	1	26.6	0	1	6	0	0	0	0	1	0	0	1	1	0	40250012	0	3	2	3	40250012	402500	0	1.66	.43	1.43
4025641208	10	0	3	0	1	1	23.7	0	1	1	1	1	0	0	0	0	0	0	1	0	40250012	0	1	2	3	40250012	402500	0	2.91	-.59	1.6
4025641209	10	0	3	0	1	1	27.5	0	1	6	1	0	0	0	0	0	0	1	1	0	40250012	0	3	2	3	40250012	402500	0	2.88	-.48	1.92
4025641210	10	0	2	1	1	1	24.8	1	1	2	0	1	0	0	0	0	0	1	0	0	40250012	1	1	2	3	40250012	402500	0	2.44	.41	2.03
4025641211	10	0	3	0	0	1	26.8	0	1	3	0	0	0	0	1	1	0	1	1	0	40250012	1	2	2	3	40250012	402500	0	-2.12	-1.29	-2.2
4025641212	10	0	3	0	1	1	22.7	1	1	3	1	0	0	0	0	0	0	1	1	0	40250012	0	2	2	3	40250012	402500	0	-.77	-1.98	-1.59
4025641213	10	0	3	1	1	1	26.6	0	1	2	1	1	0	0	0	0	0	1	1	0	40250012	0	1	2	3	40250012	402500	0	-2.26	.18	-1.59
4025641214	10	0	3	0	1	1	28.1	0	1	6	1	0	0	0	0	0	0	1	1	0	40250012	1	3	3	3	40250012	402500	0	-1.13	-1.29	-1.41
4025641215	10	0	3	0	1	1	27.3	0	1	3	0	0	0	0	0	0	0	1	1	0	40250012	0	2	3	3	40250012	402500	0	-1.15	-1.11	-1.34
4025641216	10	0	3	1	1	1	25.7	0	1	2	0	0	1	0	0	0	0	1	0	0	40250012	0	1	1	3	40250012	402500	0	-.65	-1.15	-1.09
4025641217	10	0	3	1	1	1	23.5	0	1	1	0	1	1	0	0	0	0	1	1	0	40250012	0	1	1	3	40250012	402500	0	-.15	-1.74	-1.03
4025641218	10	0	3	0	1	1	22.7	0	1	3	0	0	1	0	0	0	0	1	1	0	40250012	0	2	1	3	40250012	402500	0	-1.09	-.14	-.87
4025001302	10	1	1	0	1	1	24.5	1	1	2	0	0	0	0	0	0	1	1	0	0	40250013	1	1	2	1	40250013	402500	0	-1.21	.15	-.82
4025001303	10	1	3	0	1	1	22	0	1	5	1	0	0	0	0	0	1	1	0	0	40250013	0	3	2	1	40250013	402500	0	-1.12	-.06	-.81
4025001304	10	1	2	0	1	1	27.1	0	0	5	0	0	0	0	0	0	1	1	1	0	40250013	0	3	2	1	40250013	402500	0	.56	-1.79	-.57
4025001305	10	1	1	0	1	1		0	1	5	0	0	0	0	0	0	1	0	0	0	40250013	0	3	2	1	40250013	402500	0	-.15	-.96	-.57
4025001306	10	1	1	0	1	1	35.3	0	1	3	1	0	0	0	0	0	1	1	1	0	40250013	1	2	2	1	40250013	402500	0	.64	-1.33	-.31
4025001307	10	1	1	1	1	1	22.3	0	1	5	0	0	0	0	0	0	1	1	1	0	40250013	0	3	2	1	40250013	402500	0	1.13	-1.12	.3
4025001309	10	1	1	1	1	1	21	0	1	4	0	0	0	0	0	0	1	1	1	0	40250013	0	2	2	1	40250013	402500	0	.4	.75	.67
4025001310	10	1	1	0	1	1		0	1	5	1	0	0	0	0	0	1	1	1	0	40250013	0	3	2	1	40250013	402500	0	-1.01	-1.49	-1.69
4025001311	10	1	1	1	1	1	26.1	0	1	6	1	0	0	0	0	1	1	1	1	0	40250013	0	3	2	1	40250013	402500	0	-.36	-1.44	-1.01
4025001312	10	1	1	0	1	1	23.4	0	1	5	0	0	0	0	0	0	1	1	1	0	40250013	1	3	2	1	40250013	402500	0	.16	-1.9	-.92
4025001313	10	1	1	0	0	1	41.6	0	1	5	0	0	0	0	0	1	1	1	1	0	40250013	0	3	2	1	40250013	402500	0	-.04	-.56	-.55
4025001314	10	1	2	0	1	1	26.9	0	1	1	1	0	0	0	0	0	1	1	1	0	40250013	0	1	2	1	40250013	402500	0	.28	-.9	-.23
4025001315	10	1	1	0	1	1		0	1	6	1	0	0	0	0	0	1	1	0	0	40250013	0	3	2	1	40250013	402500	0	-1.09	.84	-.21
4025001316	10	1	2	0	1	1	38.6	0	1	4	1	0	0	0	0	0	1	1	1	0	40250013	0	2	2	1	40250013	402500	0	.48	-.45	-.12
4025641301	10	0	3	1	1	0	23.7	0	1	1	0	1	0	0	0	0	0	1	1	0	40250013	0	1	3	3	40250013	402500	0	.54	-.82	-.01
4025641302	10	0	3	1	0	1	27.8	0	1	3	1	0	0	0	0	0	0	1	0	0	40250013	1	2	3	3	40250013	402500	0	.61	-.33	.21
4025641303	10	0	2	0	1	1	27.8	1	1	2	1	1	0	0	0	0	0	1	1	0	40250013	0	1	3	3	40250013	402500	0	.25	.16	.26
4025641304	10	0	3	0	1	1	21.6	1	1	2	0	1	1	0	0	0	0	1	1	0	40250013	0	1	1	3	40250013	402500	0	.37	.68	.59
4025641305	10	0	2	1	1	1	24	0	1	2	0	1	1	0	0	0	0	1	1	0	40250013	1	1	1	3	40250013	402500	0	.88	.06	.66
4025641306	10	0	2	0	0	1	32.3	0	1	5	1	0	0	1	1	0	0	1	1	0	40250013	1	3	3	3	40250013	402500	0	2.38	-2.14	.84
4025641307	10	0	3	0	1	1	22.3	0	1	4	1	0	0	1	1	0	0	1	1	0	40250013	0	2	3	3	40250013	402500	0	-.17	1.74	1.03
4025641308	10	0	1	1	1	1	22.6	0	1	6	1	0	0	0	0	0	0	1	1	0	40250013	0	3	3	3	40250013	402500	0	1.58	.33	1.35
4025641309	10	0	3	1	1	1	22.8	0	1	5	1	0	0	0	0	0	0	1	1	0	40250013	0	3	3	3	40250013	402500	0	2.92	-1.08	1.79
4025641311	10	0	3	0	1	1	22.6	0	1	1	1	1	1	0	0	0	0	1	1	0	40250013	0	1	1	3	40250013	402500	0	-2.11	-2.02	-2.45
4025641312	10	0	2	0	1	1	22.8	0	1	1	1	1	0	0	0	0	0	1	1	0	40250013	0	1	3	3	40250013	402500	0	-2.31	-1.52	-2.4
4025641313	10	0	3	1	0	0	31	0	1	6	0	0	0	0	0	0	0	1	1	0	40250013	0	3	3	3	40250013	402500	0	-1.65	-1.17	-1.73
4025641314	10	0	3	0	1	1	28.4	0	1	6	0	0	0	0	1	0	0	1	1	0	40250013	0	3	3	3	40250013	402500	0	-1.21	-1.4	-1.6
4025641315	10	0	1	1	1	1	31.3	0	1	1	1	1	0	1	0	0	0	1	1	0	40250013	0	1	3	3	40250013	402500	0	-1.36	-.63	-1.28
4025641316	10	0	3	1	1	1	26.7	0	1	4	0	0	1	1	0	0	0	1	0	0	40250013	0	2	1	3	40250013	402500	0	-.82	-.93	-1.05
4025641317	10	0	3	1	1	1	26.7	0	1	4	1	0	0	0	0	0	0	1	0	0	40250013	0	2	3	3	40250013	402500	0	-1.08	.09	-.81
4025641318	10	0	2	1	1	1	22.1	0	1	2	0	1	0	0	0	0	0	0	0	0	40250013	0	1	3	3	40250013	402500	0	-.09	-1.27	-.72
4025001401	10	1	1	1	1	1	21.9	0	1	1	0	1	0	0	0	0	0	1	1	0	40250014	0	1	2	3	40250014	402500	0	.05	-1.21	-.69
4025001402	10	1	1	0	1	1	23.6	0	1	5	1	0	0	0	0	1	1	1	1	0	40250014	0	3	2	1	40250014	402500	0	-.31	-.18	-.36
4025001403	10	1	1	0	0	1	25.3	0	1	4	0	0	0	0	0	0	1	1	1	0	40250014	0	2	2	1	40250014	402500	0	.01	-.43	-.21
4025001404	10	1	1	1	1	1	35.4	0	1	1	0	1	0	0	0	0	0	1	0	0	40250014	1	1	2	3	40250014	402500	0	.12	-.65	-.19
4025001405	10	1	2	0	1	1	23.1	1	1	5	0	0	0	0	0	0	1	1	1	0	40250014	0	3	2	1	40250014	402500	0	-.54	.73	.03
4025001406	10	1	1	0	0	1	35.7	0	1	5	1	0	0	0	0	0	1	0	1	0	40250014	0	3	2	1	40250014	402500	0	.31	.28	.33
4025001407	10	1	1	1	0	1		0	1	2	1	0	0	0	0	0	1	0	0	0	40250014	1	1	2	1	40250014	402500	0	1.02	-.54	.52
4025001408	10	1	1	0	1	1	18.9	0	1	2	0	0	0	0	0	1	0	1	1	0	40250014	0	1	2	3	40250014	402500	0	1.72	.74	1.76
4025001409	10	1	1	0	0	1		0	1	2	1	0	0	0	0	0	1	0	0	0	40250014	0	1	2	1	40250014	402500	0	-2.4	-1.33	-2.57
4025001410	10	1	2	0	1	1	34.6	0	1	3	1	0	0	0	0	0	1	1	1	0	40250014	1	2	2	1	40250014	402500	0	-2.28	-.34	-1.83
4025001411	10	1	1	0	1	1		0	1	4	1	0	0	0	0	0	1	0	0	0	40250014	0	2	2	1	40250014	402500	0	-.58	-1.44	-1.19
4025001412	10	1	1	0	0	1		0	1	6	0	0	0	0	0	0	1	0	0	0	40250014	0	3	2	1	40250014	402500	0	-.24	-1.48	-.96
4025001413	10	1	1	1	1	1	27.3	0	1	3	1	0	0	0	0	0	1	1	1	0	40250014	0	2	2	1	40250014	402500	0	.81	-2.83	-.92
4025001414	10	1	1	0	1	1	23.7	1	1	4	1	0	0	0	0	0	1	1	0	0	40250014	0	2	2	1	40250014	402500	0	.41	-1.37	-.47
4025001415	10	1	1	0	1	1	29.3	1	1	5	1	0	0	1	0	0	1	1	1	0	40250014	0	3	2	1	40250014	402500	0	-2.08	2.37	-.34
4025001416	10	1	1	0	1	1	24.2	0	1	2	1	0	0	0	0	0	1	1	1	0	40250014	0	1	2	1	40250014	402500	0	1.16	-1.47	-.06
4025641401	10	0	2	1	1	1	28.6	0	1	4	1	0	1	0	0	0	0	1	1	0	40250014	0	2	1	3	40250014	402500	0	.78	-.92	.09
4025641402	10	0	3	1	1	1	22.9	0	1	4	1	0	0	0	0	0	0	1	1	0	40250014	0	2	3	3	40250014	402500	0	-.25	.82	.17
4025641403	10	0	3	0	1	1	29.6	1	1	6	1	0	1	0	0	0	0	1	0	0	40250014	0	3	1	3	40250014	402500	0	1.1	-1.06	.19
4025641404	10	0	2	0	1	1	23.2	0	1	2	1	1	0	0	0	1	0	1	1	0	40250014	0	1	3	3	40250014	402500	0	2.01	-.57	1.11
4025641405	10	0	3	0	1	1	26.3	0	1	3	1	0	1	0	0	0	0	1	1	0	40250014	1	2	1	3	40250014	402500	0	2.98	-1.33	1.51
4025641406	10	0	3	0	1	1	28.3	0	1	1	1	1	0	0	0	0	0	1	1	0	40250014	1	1	3	3	40250014	402500	0	3.13	-1.15	1.8
4025641407	10	0	3	1	1	1	27.8	0	1	4	1	0	0	0	0	0	0	1	1	0	40250014	0	2	3	3	40250014	402500	0	1.09	1.66	1.8
4025641408	10	0	3	0	1	1	25.8	0	1	6	1	0	0	0	0	0	0	1	1	0	40250014	1	3	3	3	40250014	402500	0	2.87	1.07	2.8
4025641409	10	0	3	0	1	1	26.8	0	1	2	1	1	1	0	0	0	0	1	1	1	40250014	0	1	1	3	40250014	402500	0	-.39	-3.57	-2.81
4025002102	10	1	2	1	1	1	22.8	0	1	5	0	0	1	0	0	0	1	1	1	0	40250021	0	3	1	1	40250021	402500	0	-.51	-1.96	-1.48
4025002103	10	1	2	1	1	1	24.7	1	1	3	0	0	0	0	0	0	1	1	1	0	40250021	0	2	3	1	40250021	402500	0	.18	-2.52	-1.34
4025002104	10	1	1	0	1	1	22.7	0	1	3	1	0	1	1	0	0	1	1	1	0	40250021	0	2	1	1	40250021	402500	0	-.13	-2.05	-1.19
4025002105	10	1	3	0	1	1	20.3	0	1	1	0	1	1	0	0	0	0	1	1	0	40250021	0	1	1	2	40250021	402500	0	-.56	-1.3	-1.03
4025002106	10	1	2	1	1	1	24.5	0	1	1	0	1	0	0	0	0	0	1	1	0	40250021	0	1	2	2	40250021	402500	0	.71	-2.77	-.88
4025002107	10	1	2	1	1	1	24.3	0	1	5	1	0	0	0	0	0	1	1	1	0	40250021	1	3	3	1	40250021	402500	0	.68	-1.71	-.83
4025002108	10	1	1	1	1	1	28.4	0	1	2	0	0	0	0	0	0	0	1	1	0	40250021	0	1	3	2	40250021	402500	0	-.01	-1.52	-.71
4025002109	10	1	2	1	1	1	23.9	0	1	6	0	0	1	0	0	0	1	1	1	0	40250021	0	3	1	1	40250021	402500	0	-.54	-.63	-.67
4025002110	10	1	2	0	0	1	30.4	0	1	4	1	0	0	0	0	0	1	1	1	0	40250021	0	2	3	1	40250021	402500	0	.04	-1.21	-.57
4025002111	10	1	1	0	1	1	32.4	0	1	4	1	0	0	0	0	0	1	1	0	0	40250021	1	2	3	1	40250021	402500	0	.24	-1.04	-.5
4025002112	10	1	1	1	0	1	30.4	0	1	1	1	1	0	0	0	0	0	1	1	0	40250021	0	1	3	3	40250021	402500	0	-1.09	.51	-.46
4025002113	10	1	2	1	1	1	22.8	0	1	2	1	1	1	0	0	0	1	1	1	0	40250021	1	1	1	1	40250021	402500	0	.21	-.84	-.28
4025002114	10	1	1	1	1	1	31.8	0	1	5	0	0	1	0	0	0	1	1	0	0	40250021	0	3	1	1	40250021	402500	0	-.25	-.28	-.28
4025002115	10	1	1	1	1	0		0	1	4	0	0	1	0	0	0	1	0	0	0	40250021	0	2	1	1	40250021	402500	0	.2	.08	.19
4025002116	10	1	1	1	1	1		0	1	6	0	0	0	0	0	0	1	0	0	0	40250021	0	3	3	1	40250021	402500	0	.26	.7	.51
4025002117	10	1	2	1	1	1	25.1	0	1	6	1	1	1	0	0	0	1	1	1	0	40250021	1	3	1	1	40250021	402500	0
4025002118	10	1	1	0	1	1	41.6	0	1	5	0	0	1	0	0	0	1	1	1	0	40250021	0	3	1	1	40250021	402500	0	-.97	1.05	-.24
4025002119	10	1	3	0	1	1	23.8	0	1	1	1	1	0	0	0	0	0	1	1	0	40250021	0	1	2	2	40250021	402500	0	.8	-1.5	-.22
4025662101	10	0	2	1	1	1	26.8	1	1	6	0	0	0	0	0	0	0	1	0	0	40250021	0	3	2	3	40250021	402500	0	1.53	-1.87	.17
4025662102	10	0	2	0	1	1	29.9	0	0	6	1	0	0	0	0	0	0	0	1	0	40250021	0	3	2	3	40250021	402500	0	1.56	-1.5	.38
4025662103	10	0	1	0	1	1	23.9	0	1	3	1	0	0	0	0	0	0	1	1	1	40250021	0	2	2	3	40250021	402500	0	.81	-.5	.39
4025662104	10	0	3	1	1	1	23.2	0	1	2	0	0	0	0	0	0	0	1	1	1	40250021	1	1	2	3	40250021	402500	0	1.68	-1.65	.49
4025662105	10	0	2	1	1	1	22.3	0	1	1	1	1	0	0	0	0	0	1	1	0	40250021	0	1	2	3	40250021	402500	0	1.78	-.61	.94
4025662106	10	0	2	1	1	1	22.3	0	1	2	1	1	0	0	0	0	0	1	1	0	40250021	0	1	2	3	40250021	402500	0	.83	.81	1
4025662107	10	0	2	1	1	1	24.2	0	1	1	1	1	0	0	0	0	0	0	1	0	40250021	0	1	2	3	40250021	402500	0	.11	1.79	1.05
4025662108	10	0	1	1	1	1	21.7	0	1	1	1	1	0	0	0	0	0	1	1	1	40250021	0	1	2	3	40250021	402500	0	-.12	2.39	1.3
4025662109	10	0	2	0	0	1	32.7	0	1	5	0	0	0	1	0	0	0	1	1	0	40250021	0	3	2	3	40250021	402500	0	2.2	-.42	1.41
4025662110	10	0	3	0	0	1	25.3	0	1	2	0	1	0	0	0	0	0	1	1	0	40250021	1	1	2	3	40250021	402500	0	.97	1.47	1.46
4025662111	10	0	3	0	1	1	33.8	0	1	3	0	1	0	0	0	0	0	0	1	0	40250021	0	2	2	3	40250021	402500	0	1.7	.94	1.91
4025662112	10	0	2	0	1	1	26.3	0	1	2	0	1	0	0	0	0	0	1	1	1	40250021	1	1	2	3	40250021	402500	0	-.72	5.89	1.94
4025662113	10	0	2	0	1	1	22.2	0	1	1	0	1	0				0	1	1	0	40250021	0	1	2	3	40250021	402500	0	4.18	-.91	2.14
4025662114	10	0	1	1	0	1	29	0	1	2	0	1	0	0	0	0	0	0	1	0	40250021	0	1	2	3	40250021	402500	0	-1.29	-1.12	-1.48
4025662115	10	0	1	0	1	1		0	1	2	0	0	0	0	0	0	0	1	1	0	40250021	0	1	2	3	40250021	402500	0	.26	-2.15	-1.31
4025002201	10	1	1	0	1	1	29.6	0	1	6	1	0	0	1	0	0	1	1	1	0	40250022	0	3	3	1	40250022	402500	0	-1.26	-.75	-1.3
4025002202	10	1	1	0	0	1	37.3	0	1	6	1	0	0	0	0	0	1	1	1	0	40250022	0	3	3	1	40250022	402500	0	-2.99	1.43	-1.25
4025002203	10	1	3	0	1	1	22.3	0	1	4	1	0	0	1	0	0	1	1	1	0	40250022	0	2	3	1	40250022	402500	0	-1.22	-.65	-1.2
4025002204	10	1	1	0	0	1	36.5	0	1	6	1	0	0	0	0	0	1	0	0	0	40250022	0	3	3	1	40250022	402500	0	-.36	-1.19	-.91
4025002205	10	1	1	0	1	1	23.7	0	1	4	1	0	0	0	0	0	1	0	0	0	40250022	0	2	3	1	40250022	402500	0	.47	-1.81	-.76
4025002206	10	1	3	0	1	1	22.7	0	1	6	0	0	0	1	0	0	1	1	1	0	40250022	1	3	3	1	40250022	402500	0	-.19	-1.05	-.75
4025002207	10	1	1	0	1	1	23.9	0	1	5	1	0	0	1	0	0	1	1	1	0	40250022	0	3	3	1	40250022	402500	0	-.34	-.62	-.62
4025002208	10	1	1	0	1	1		0	1	5	0	0	0	0	0	1	1	1	0	0	40250022	0	3	3	1	40250022	402500	0	-.53	-.42	-.57
4025002209	10	1	1	0	1	1	22.8	0	1	3	1	0	1	0	0	0	1	1	1	0	40250022	0	2	1	1	40250022	402500	0	-1.01	.4	-.48
4025002210	10	1	1	0	1	1	23.9	1	1	3	0	0	1	0	0	0	1	1	0	0	40250022	1	2	1	1	40250022	402500	0	.14	-.81	-.46
4025002212	10	1	3	0	0	1	36.8	0	1	6	1	0	1	0	1	0	1	1	1	0	40250022	1	3	1	1	40250022	402500	0	-.63	.93	-.03
4025002213	10	1	1	0	1	1	21.3	0	1	3	0	0	1	0	0	0	1	1	1	0	40250022	0	2	1	1	40250022	402500	0	-.58	.93	.13
4025662201	10	0	2	0	0	1	40.6	0	1	5	0	0	0	1	1	0	0	1	1	0	40250022	0	3	2	3	40250022	402500	0	.83	.18	.69
4025662202	10	0	2	0	0	1	37.3	0	1	2	0	1	0	0	0	0	0	1	1	0	40250022	0	1	2	3	40250022	402500	0	.16	.94	.81
4025662203	10	0	1	1	1	1	25.6	0	1	6	0	0	0	0	0	0	0	1	1	1	40250022	0	3	2	3	40250022	402500	0	-3.76	2.04	-1.49
4025662204	10	0	2	1	1	1	22.8	0	1	4	1	0	0	0	0	0	0	0	1	0	40250022	1	2	2	3	40250022	402500	0	-.92	.55	-.46
4025662205	10	0	3	1	1	1	22.3	0	1	2	0	1	0	0	0	0	0	1	1	1	40250022	0	1	2	3	40250022	402500	0	-.82	.46	-.42
4025662206	10	0	3	1	1	1	26.8	0	1	6	1	0	0	0	1	0	0	1	1	0	40250022	0	3	2	3	40250022	402500	0	-.84	.39	-.35
4025662207	10	0	3	0	1	1	29.3	1	1	4	1	0	0	0	0	0	0	1	0	0	40250022	1	2	3	3	40250022	402500	0	-1.21	1.05	-.28
4025662208	10	0	3	0	1	1	29.9	1	1	3	0	0	0	0	0	0	0	1	1	0	40250022	0	2	3	3	40250022	402500	0	.24	-.77	-.15
4025662209	10	0	2	0	1	1	27.8	0	1	3	0	0	1	0	0	0	0	1	1	0	40250022	0	2	1	3	40250022	402500	0	-.11	.39	.12
4025662210	10	0	3	0	1	1	35.1	0	1	1	0	0	0	0	0	0	0	0	0	0	40250022	0	1	3		40250022	402500	0	.82	-.72	.22
4025662211	10	0	1	0	0	1	28.6	0	1	2	1	1	0	0	0	0	0	1	1	0	40250022	0	1	3	3	40250022	402500	0	.11	.32	.22
4025662212	10	0	1	1	1	1	21.8	0	0	2	0	1	0	0	0	0	0	1	1	0	40250022	0	1	3	3	40250022	402500	0	.34	.12	.32
4025662213	10	0	1	0	1	1	21.3	0	1	2	1	1	1	1	0	0	0	1	1	0	40250022	0	1	1	3	40250022	402500	0	-.18	.9	.35
4025662214	10	0	2	1	1	1	25.4	0	1	6	1	0	0	0	0	0	0	1	1	0	40250022	0	3	3	3	40250022	402500	0	1.1	-.1	.75
4025662215	10	0	3	1	1	1	25.7	0	1	1	1	1	0	0	0	0	0	1	0	0	40250022	0	1	3	3	40250022	402500	0	.77	.61	.87
4025002301	10	1	2	0	1	1	24.8	0	1	6	0	0	0	0	0	0	1	1	1	0	40250023	0	3	2	1	40250023	402500	0	.9	.33	.88
4025002302	10	1	3	0	1	1		0	1	4	0	0	0	0	0	0	1	1	1	0	40250023	0	2	2	1	40250023	402500	0	.58	.96	.94
4025002303	10	1	1	1	1	1	25	0	1	2	1	1	0	0	0	0	1	1	1	0	40250023	0	1	2	1	40250023	402500	0	.02		2.68
4025002304	10	1	1	0	1	1	24.6	0	1	3	1	0	0	0	0	0	1	1	1	0	40250023	0	2	2	1	40250023	402500	0	-2.87	-.57	-2.33
4025002305	10	1	2	0	0	1	39.4	0	1	6	1	0	0	0	0	0	1	0	1	0	40250023	0	3	2	1	40250023	402500	0	-1.63	-1.54	-1.89
4025002306	10	1	2	1	1	1	22.9	0	1	3	1	0	0	0	0	0	1	1	1	0	40250023	0	2	3	1	40250023	402500	0	-2.71	.38	-1.8
4025002307	10	1	2	1	1	1	22.7	0	1	3	1	0	0	1	0	0	1	1	1	0	40250023	0	2	2	1	40250023	402500	0	-1.32	-1.48	-1.7
4025002308	10	1	1	1	1	1		1	1	4	0	0	0	0	0	0	1	1	1	0	40250023	0	2	2	1	40250023	402500	0	-1.24	-1.43	-1.58
4025002309	10	1	1	0	1	1		0	1	3	1	0	0	0	0	0	1	0	0	0	40250023	1	2	2	1	40250023	402500	0	-2.53	.96	-1.17
4025002310	10	1	1	1	1	1	24.3	0	1	5	1	0	0	0	0	0	1	1	1	0	40250023	0	3	2	1	40250023	402500	0	-1.03	-.61	-1.01
4025002311	10	1	3	1	1	1		0	1	2	1	0	0	0	0	0	1	0	0	0	40250023	1	1	2	1	40250023	402500	0	-.47	-1.32	-.94
4025002312	10	1	1	0	1	1	27.1	0	1	5	0	0	0	0	0	0	1	1	1	0	40250023	1	3	2	1	40250023	402500	0	-1.78	.9	-.88
4025002313	10	1	2	1	1	1	25.4	0	1	3	1	0	0	0	0	0	1	1	1	0	40250023	0	2	2	1	40250023	402500	0	-1.04	.1	-.75
4025002314	10	1	1	1	1	1	22.5	0	1	5	0	0	0	0	0	0	1	1	1	0	40250023	1	3	2	1	40250023	402500	0	-1.76	.9	-.72
4025002315	10	1	1	0	1	1	24.6	0	1	4	0	0	0	0	0	0	1	1	1	0	40250023	1	2	2	1	40250023	402500	0	-.28	-.28	-.37
4025002316	10	1	1	0	1	1		0	1	3	1	0	0	0	0	0	1	1	1	0	40250023	1	2	2	1	40250023	402500	0	.84	-1.34	.02
4025662301	10	0	3	1	1	1	24.3	0	1	2	1	1	1	1	0	0	0	1	0	0	40250023	0	1	1	3	40250023	402500	0	.53	-.21	.26
4025662302	10	0	3	1	1	1	25.5	0	1	5	1	0	0	0	0	0	0	1	1	0	40250023	1	3	3	3	40250023	402500	0	1.31	-.61	.64
4025662303	10	0	1	0	1	1	22.1	0	1	3	1	0	0	0	0	0	0	1	1	0	40250023	1	2	3	3	40250023	402500	0	.99	.38	.93
4025662304	10	0	3	1	0	1	29.8	0	1	3	1	0	0	1	1	0	0	0	1	0	40250023	0	2	3	3	40250023	402500	0	-.43	-.39	-.51
4025662305	10	0	3	1	0	1	28	0	1	1	0	0	1	0	0	0	0	0	1	0	40250023	0	1	1	3	40250023	402500	0	-.68	.13	-.45
4025662306	10	0	3	1	1	1	21.8	0	1	3	1	0	1	0	1	0	0	1	1	0	40250023	1	2	1	3	40250023	402500	0	-.62	.11	-.36
4025662307	10	0	3	1	1	0	27.2	0	1	6	0	0	1	0	0	0	0	1	1	0	40250023	0	3	1	3	40250023	402500	0	-.92	1.56	-.01
4025662308	10	0	3	1	1	1	28.3	0	1	6	1	0	1	0	0	0	0	1	0	0	40250023	0	3	1	3	40250023	402500	0	.2	-.18	.08
4025662309	10	0	3	0	1	1	22.9	0	1	4	0	0	1	0	0	0	0	1	1	0	40250023	0	2	1	3	40250023	402500	0	-.4	1.5	.36
4025662310	10	0	3	0	1	1	21.7	0	1	1	1	1	1	0	0	0	0	1	1	1	40250023	1	1	1	3	40250023	402500	0	.25	.31	.39
4025662311	10	0	2	1	1	1	26.5	0	1	5	0	0	0	0	0	0	0	1	1	0	40250023	1	3	3	3	40250023	402500	0	.52	.22	.45
4025662312	10	0	3	1	0	0	26.3	0	1	6	1	0	0	0	0	0	0	1	0	0	40250023	0	3	3	3	40250023	402500	0	.04	1.19	.56
4025662313	10	0	3	1	1	1	28.9	0	1	4	0	0	0	1	0	0	0	1	1	0	40250023	0	2	3	3	40250023	402500	0	1.51	-.81	.58
4025662314	10	0	3	0	1	1	24.6	0	1	1	1	1	1	0	0	0	0	1	1	0	40250023	0	1	1	3	40250023	402500	0	.62	.36	.63
4025662315	10	0	3	1	1	1	23.7	0	1	4	1	0	1	0	0	0	0	1	1	0	40250023	0	2	1	3	40250023	402500	0	.39	.62	.68
4025662316	10	0	3	1	1	1	27.6	0	1	4	1	0	1	0	0	0	0	1	1	0	40250023	0	2	1	3	40250023	402500	0	1.22	-.42	.76
4025662317	10	0	2	1	1	1	24.6	0	1	3	1	0	1	0	1	1	0	1	1	1	40250023	1	2	1	3	40250023	402500	0	.92	.4	.85
4025662318	10	0	2	1	1	1	27.5	0	1	3	1	0	0	1	1	0	0	1	1	0	40250023	0	2	3	3	40250023	402500	0	1.36	.75	1.34
4025002401	10	1	2	0	1	1	18.5	0	1	3	0	0	0	0	0	0	1	1	1	0	40250024	0	2	2	1	40250024	402500	0	.71	3.18	2.15
4025002402	10	1	2	0	1	1	27.9	0	1	1	1	1	0	0	0	0	0	1	0	0	40250024	0	1	2	3	40250024	402500	0	-1.27	-3.17	-2.98
4025002403	10	1	2	0	1	1	23.6	0	1	1	0	1	0	0	0	0	0	1	1	0	40250024	0	1	2	3	40250024	402500	0	-3.05	-1.09	-2.71
4025002404	10	1	2	1	1	1	22.2	0	1	1	0	1	0	0	0	0	0	1	1	0	40250024	0	1	2	3	40250024	402500	0	-2.27	-2.28	-2.69
4025002405	10	1	2	1	1	1		0	1	2	0	0	0	0	0	0	1	1	1	0	40250024	0	1	2	1	40250024	402500	0	-.62	-1.97	-1.5
4025002406	10	1	2	0	1	1	24.4	0	1	2	0	0	0	0	0	0	1	1	1	0	40250024	1	1	2	1	40250024	402500	0	-1.26	-.03	-1
4025002407	10	1	1	1	0	1	32	0	1	2	0	1	0	0	0	0	1	1	0	0	40250024	0	1	2	1	40250024	402500	0	-1.75	.64	-1
4025002408	10	1	1	0	1	1	23.5	0	1	4	0	0	0	0	0	0	1	1	1	0	40250024	0	2	2	1	40250024	402500	0	-.5	-.92	-.8
4025002409	10	1	1	1	0	1	34.8	0	1	4	0	0	0	0	0	0	1	1	1	0	40250024	0	2	2	1	40250024	402500	0	-.51	-.59	-.64
4025002410	10	1	1	0	1	1	23.5	0	1	5	0	0	0	0	0	0	1	0	0	0	40250024	0	3	2	1	40250024	402500	0	-.43	-.57	-.63
4025002411	10	1	1	0	1	1	23.3	0	1	5	1	0	0	0	0	0	1	1	1	0	40250024	0	3	2	1	40250024	402500	0	-1.16	.9	-.51
4025002412	10	1	1	1	0	1		0	1	6	0	0	0	0	0	0	1	1	0	0	40250024	0	3	2	1	40250024	402500	0	-.73	.35	-.35
4025002413	10	1	3	1	1	1	22.8	0	1	3	1	0	0	0	0	0	1	1	1	0	40250024	0	2	2	1	40250024	402500	0	-.34	-.2	-.32
4025002414	10	1	2	1	1	1	21.2	0	1	3	1	1	0	0	0	0	1	1	1	0	40250024	0	2	2	1	40250024	402500	0	.41	-.49	.06
4025002415	10	1	3	0	1	1	24.3	1	1	6	1	0	0	0	0	0	1	1	1	0	40250024	0	3	2	1	40250024	402500	0	-.67	1.28	.07
4025002416	10	1	2	1	1	1	23.3	0	1	4	0	0	0	0	0	0	1	1	1	0	40250024	0	2	2	1	40250024	402500	0	-.02	.15	.1
4025662401	10	0	2	1	1	1	38.8	1	1	4	1	0	1	1	0	0	0	1	1	0	40250024	0	2	1	3	40250024	402500	0	1.06	-.99	.25
4025662402	10	0	3	1	1	1	27.3	0	1	5	0	0	0	0	0	0	0	1	1	0	40250024	0	3	3	3	40250024	402500	0		-1.8	-4.82
4025662403	10	0	3	1	1	1	25.8	0	1	4	1	0	0	0	0	0	0	1	1	0	40250024	0	2	3	3	40250024	402500	0	-2.66	-2.37	-3.2
4025662404	10	0	3	1	1	1	24.8	0	1	1	0	1	0	0	0	0	0	1	1	0	40250024	0	1	3	3	40250024	402500	0	-1.66	-1.61	-2
4025662405	10	0	2	1	1	0	22.4	0	1	6	1	0	0	0	0	0	0	1	1	0	40250024	1	3	3	3	40250024	402500	0	-1.67	-.34	-1.45
4025662406	10	0	3	1	0	1	21.3	0	1	1	0	1	0	0	0	0	0	1	1	0	40250024	0	1	3	3	40250024	402500	0	-.34	-1.95	-1.26
4025662407	10	0	3	0	1	1	24.8	0	1	6	1	0	0	0	0	0	0	1	0	0	40250024	0	3	3	3	40250024	402500	0	-.26	-1.87	-1.18
4025662408	10	0	2	0	1	1		0	1	3	0	0	0	0	0	0	0	0	0	0	40250024	1	2	3	3	40250024	402500	0	-.75	-.91	-1
4025662409	10	0	2	1	0	1	27.8	0	1	5	0	0	1	1	1	0	0	1	1	0	40250024	1	3	1	3	40250024	402500	0	-.74	-.4	-.7
4025662410	10	0	3	0	1	1	24.4	1	1	4	0	0	0	0	0	0	0	1	0	0	40250024	0	2	3	3	40250024	402500	0	-.07	-1.21	-.67
4025662411	10	0	3	0	1	1	24.4	0	1	6	0	0	0	0	0	0	0	1	1	0	40250024	1	3	3	3	40250024	402500	0	-.46	1.43	.25
4025662412	10	0	3	1	1	1	22.6	0	1	2	0	0	0	0	0	0	0	1	1	0	40250024	0	1	3	3	40250024	402500	0	-.18	1.03	.32
4025662413	10	0	3	0	1	1	27.8	0	1	4	1	0	0	1	1	0	0	0	1	0	40250024	1	2	3	3	40250024	402500	0	.97	-.38	.58
4025662414	10	0	2	1	1	1	26.4	0	1	6	1	0	0	0	0	0	0	1	1	0	40250024	0	3	3	3	40250024	402500	0	1.28	-.18	.82
4025662415	10	0	3	1	1	1	30.1	0	1	5	0	0	0	0	0	0	0	1	1	0	40250024	1	3	3	3	40250024	402500	0	.13	2.38	1.1
4025662416	10	0	2	1	0	1	28.4	0	1	4	1	0	0	0	0	0	0	1	1	0	40250024	0	2	3	3	40250024	402500	0	2.23	.15	1.74
4025003101	10	1	1	0	0	1	32.8	0	1	5	1	1	0	0	0	0	1	1	1	0	40250031	1	3	3	1	40250031	402500	0	1.34	1.85	1.75
4025003102	10	1	1	0	0	1	39.3	0	1	6	1	0	0	0	0	0	1	1	1	0	40250031	0	3	3	1	40250031	402500	0	-2.53	-1.2	-2.49
4025003103	10	1	1	1	1	1	22.5	0	1	5	0	0	0	0	0	0	1	1	1	0	40250031	0	3	3	1	40250031	402500	0	-1.78	-1.76	-2.4
4025003104	10	1	1	1	0	1	33.6	0	1	4	0	0	0	0	0	0	1	1	1	0	40250031	0	2	3	1	40250031	402500	0	-.73	-2.52	-1.9
4025003105	10	1	1	0	1	1	31.8	0	1	5	0	0	1	0	1	0	1	1	1	0	40250031	1	3	1	1	40250031	402500	0	-1.08	-1	-1.28
4025003106	10	1	1	1	1	1	22.7	0	1	3	0	0	0	0	0	0	1	1	1	0	40250031	0	2	3	1	40250031	402500	0	-.93	-1.07	-1.18
4025003107	10	1	2	0	1	1		0	1	6	1	0	1	0	0	0	1	1	1	0	40250031	0	3	1	1	40250031	402500	0	-.71	-1.23	-1.11
4025003108	10	1	1	0	1	1	23.2	0	1	3	1	0	0	0	0	0	1	1	1	0	40250031	0	2	3	1	40250031	402500	0	-1.42	.07	-1.04
4025003109	10	1	1	0	1	1	23.8	0	1	6	0	0	0	0	0	0	1	1	1	0	40250031	0	3	3	1	40250031	402500	0	.21	-1.98	-.93
4025003110	10	1	1	0	1	1	31.2	0	1	3	0	0	1	0	1	1	1	1	1	0	40250031	0	2	1	1	40250031	402500	0	-.39	-.81	-.88
4025003112	10	1	1	0	0	1	38.5	0	1	5	1	0	0	1	0	0	1	1	1	0	40250031	0	3	3	1	40250031	402500	0	-.12	-1	-.7
4025003113	10	1	1	0	1	1	25.2	0	1	1	1	1	0	0	0	0	0	1	1	1	40250031	0	1	3	3	40250031	402500	0	.33	-.81	-.25
4025003114	10	1	1	1	1	1	23.3	0	1	3	0	0	1	0	0	0	1	1	1	1	40250031	1	2	1	1	40250031	402500	0	-.39	.03	-.18
4025653102	10	0	3	1	0	1	29.8	0	1	4	1	0	0	0	0	0	0	1	1	0	40250031	0	2	3	3	40250031	402500	0	-.18	.44	.16
4025653103	10	0	1	0	0	0	30.8	0	1	2	0	1	1	0	0	0	0	1	1	1	40250031	1	1	1	3	40250031	402500	0	-.03	1.03	.63
4025653104	10	0	3	1	1	0	23.1	0	1	3	1	0	1	0	0	0	0	0	1	0	40250031	0	2	1	3	40250031	402500	0	.99	.21	.87
4025653105	10	0	1	1	1	1	27.5	0	1	1	1	1	1	0	0	0	0	1	1	1	40250031	1	1	1	3	40250031	402500	0	1.71	-.15	1.17
4025653106	10	0	3	1	1	1	21.8	0	1	3	0	0	1	0	0	0	0	1	1	0	40250031	0	2	1	3	40250031	402500	0	-1.34	-1.69	-1.82
4025653107	10	0	2	1	1	1	20.9	0	1	1	0	1	0	0	0	0	0	0	1	0	40250031	0	1	3	3	40250031	402500	0	-1.37	-1.04	-1.52
4025653108	10	0	2	0	1	1	27	0	1	2	0	1	1	1	0	0	0	1	0	0	40250031	0	1	1	3	40250031	402500	0	-1.13	-1.26	-1.46
4025653109	10	0	2	1	0	1	27.1	0	1	5	1	0	0	0	0	0	0	1	1	0	40250031	0	3	3	3	40250031	402500	0	-1.23	-.66	-1.38
4025653110	10	0	2	1	1	1	26.5	0	1	2	0	1	0	0	0	0	0	1	1	0	40250031	0	1	3	3	40250031	402500	0	-.68	-1.59	-1.34
4025653111	10	0	3	0	0	1	26.8	0	1	3	0	0	0	0	0	0	0	1	1	0	40250031	0	2	3	3	40250031	402500	0	-.55	-.56	-.64
4025653112	10	0	1	1	0	1	24	0	1	4	1	0	1	1	0	0	0	1	1	0	40250031	1	2	1	3	40250031	402500	0	.13	-1.48	-.63
4025653113	10	0	3	1	1	1	25.2	0	1	4	1	0	0				0	0	1	1	40250031	0	2	2	3	40250031	402500	0	-.3	-.72	-.55
4025653114	10	0	1	1	1	1	23.3	0	1	2	0	1	0				0	1	1	0	40250031	0	1	2	3	40250031	402500	0	-.87	.27	-.55
4025653115	10	0	3	0	1	1	22.9	0	1	3	0	0	0				0	1	1	0	40250031	0	2	2	3	40250031	402500	0	.85	-1.28	-.27
4025003201	10	1	1	1	0	1	34.2	0	1	4	0	0	0	0	0	0	1	1	1	0	40250032	0	2	2	1	40250032	402500	0	1.52	-1.85	.16
4025003202	10	1	1	1	1	1	16.3	0	1	2	0	0	0	0	0	0	1	1	1	0	40250032	1	1	2	1	40250032	402500	0	.77	-.46	.36
4025003204	10	1	2	0	1	1	21.9	0	1	4	1	0	0	1	0	0	1	0	0	0	40250032	0	2	2	1	40250032	402500	0	1.91	-1.18	.87
4025003205	10	1	1	0	0	1	32.4	0	1	2	1	0	0	1	0	0	1	0	1	0	40250032	0	1	2	1	40250032	402500	0	2.32	-1.1	1.11
4025003206	10	1	1	0	1	1	24.4	0	1	2	0	1	1	0	0	0	0	1	0	0	40250032	0	1	1	3	40250032	402500	0	1.97	-.4	1.23
4025003207	10	1	2	0	1	1	25.3	1	1	2	1	1	1	0	0	0	1	1	0	0	40250032	0	1	1	1	40250032	402500	0	.52	1.1	1.24
4025003208	10	1	1	0	0	1	37.6	0	1	1	1	1	1	0	0	0	0	1	0	1	40250032	0	1	1	3	40250032	402500	0	-2.45	-1.1	-2.26
4025003209	10	1	1	1	1	1	26.1	0	1	3	1	0	0	0	0	0	1	0	0	0	40250032	0	2	2	1	40250032	402500	0	-1.32	-2	-2.1
4025003210	10	1	3	1	1	1	20.6	0	1	3	0	0	0	1	0	0	0	1	0	0	40250032	0	2	3	2	40250032	402500	0	-1.88	-.88	-1.78
4025003211	10	1	2	0	1	1	23.9	0	1	4	0	0	0	0	0	0	1	1	0	0	40250032	0	2	3	1	40250032	402500	0	-1.96	-.78	-1.69
4025003212	10	1	1	1	1	1	29.7	0	1	4	1	0	0	0	0	0	1	1	1	1	40250032	0	2	3	1	40250032	402500	0	-.82	-1.87	-1.57
4025003213	10	1	3	0	1	1	34.7	1	1	6	0	0	0	0	0	0	1	1	0	0	40250032	0	3	3	1	40250032	402500	0	-.58	-1.86	-1.48
4025003214	10	1	1	0	1	1	23.6	1	1	1	0	1	1	0	0	0	0	1	0	0	40250032	0	1	1	3	40250032	402500	0	-1.74	-.31	-1.31
4025653201	10	0	1	1	0	1	34.4	0	1	2	0	1	1	0	0	0	0	1	0	0	40250032	1	1	1	3	40250032	402500	0	-1.9	.05	-1.29
4025653202	10	0	3	1	1	1	21.7	0	1	2	0	1	0	0	0	0	0	1	1	0	40250032	1	1	3	3	40250032	402500	0	-1.21	-.07	-.84
4025653203	10	0	2	1	1	1	21.7	0	1	2	1	1	1	0	0	0	0	1	1	0	40250032	0	1	1	3	40250032	402500	0	-1.34	.26	-.74
4025653205	10	0	2	1	1	1	22.3	0	1	4	0	0	1	0	0	0	0	1	0	0	40250032	0	2	1	3	40250032	402500	0	-.8	.16	-.51
4025653206	10	0	2	0	1	1	22	0	1	5	1	0	1	0	0	0	0	1	1	0	40250032	1	3	1	3	40250032	402500	0	.47	-.79	-.08
4025653207	10	0	1	0	1	1	34.1	0	1	2	0	0	1	0	0	0	0	0	1	0	40250032	0	1	1	3	40250032	402500	0	.43	-.5	-.04
4025653208	10	0	3	0	1	1	25.5	0	1	4	1	0	0	0	0	0	0	1	1	0	40250032	1	2	3	3	40250032	402500	0	-.35	.44	-.01
4025653209	10	0	3	1	1	1	25.9	0	1	4	0	0	0				0	1	1	0	40250032	0	2	2	3	40250032	402500	0	.06	.34	.17
4025653210	10	0	1	1	1	1	24	1	1	6	1	0	0	0	0	0	0	1	1	0	40250032	0	3	3	3	40250032	402500	0	.19	.08	.19
4025653211	10	0	3	0	1	0	27.3	0	1	4	1	0	0	0	0	0	0	1	1	1	40250032	1	2	3	3	40250032	402500	0	-2.12	-2.22	-2.78
4025653212	10	0	1	1	1	0	27.2	0	1	1	1	1	0	0	0	0	0	1	1	0	40250032	0	1	3	3	40250032	402500	0	-.56	-4.13	-2.66
4025653213	10	0	2	0	1	0	25.3	0	1	2	1	0	0	0	0	0	0	1	0	0	40250032	0	1	3	3	40250032	402500	0	-1.57	-1.26	-1.8
4025653214	10	0	3	1	1	1	21.3	0	1	1	1	1	0	0	0	0	0	1	1	0	40250032	0	1	3	3	40250032	402500	0	-1.99	.11	-1.39
4025653216	10	0	2	1	1	1	20.3	0	1	1	1	1	1	0	0	0	0	1	0	1	40250032	1	1	1	3	40250032	402500	0	-.1	-1.96	-1.38
4025653217	10	0	2	1	1	0	24.3	0	0	2	0	1	0	0	0	0	0	0	1	1	40250032	0	1	3	3	40250032	402500	0	-1.75	-.12	-1.34
4025653218	10	0	3	0	1	1	27.8	1	1	3	1	0	1	0	0	0	0	1	1	0	40250032	1	2	1	3	40250032	402500	0	-.9	-.94	-1.31
4025003301	10	1	1	0	1	1	25.1	0	1	5	0	0	0	0	0	0	0	1	1	0	40250033	0	3	3	2	40250033	402500	0	-.5	-1.82	-1.24
4025003302	10	1	1	0	1	1	24.2	0	1	6	1	0	0	0	0	0	1	1	1	0	40250033	0	3	3	1	40250033	402500	0	-.91	-1.2	-1.23
4025003303	10	1	1	0	0	1	32.3	0	1	6	1	0	0	1	0	0	1	1	1	0	40250033	1	3	3	1	40250033	402500	0	.04	-1.24	-.82
4025003305	10	1	1	0	0	1	36	0	1	6	1	0	1	1	1	0	1	1	1	0	40250033	1	3	1	1	40250033	402500	0	-.18	-1.08	-.69
4025003309	10	1	1	0	1	1		1	1	2	1	0	0	0	0	0	0	0	0	0	40250033	0	1	2	3	40250033	402500	0	-.2	.13	-.05
4025003310	10	1	1	0	1	1		0	1	6	1	0	0	0	0	0	1	0	0	0	40250033	1	3	2	1	40250033	402500	0	.69	-.69	.1
4025003312	10	1	1	0	1	1		0	1	3	0	0	0	0	0	0	1	0	0	0	40250033	1	2	2	1	40250033	402500	0	.7	-.44	.29
4025003313	10	1	1	0	1	1	25.7	0	0	4	1	0	0	0	0	0	1	1	1	0	40250033	0	2	3	1	40250033	402500	0	.9	-.3	.52
4025003314	10	1	2	0	1	1	23.2	0	1	3	1	0	0	0	0	0	1	1	1	0	40250033	0	2	3	1	40250033	402500	0	1.28	2.92	2.52
4025003315	10	1	1	0	1	1	23	0	1	5	0	0	0	1			1	1	1	0	40250033	1	3	3	1	40250033	402500	0	-1.87	-2.6	-2.72
4025003316	10	1	1	0	1	1	29.5	0	1	4	1	0	0	0	0	0	1	1	1	0	40250033	0	2	3	1	40250033	402500	0	-1.24	-1.95	-1.95
4025003401	10	1	1	0	0	1	32.2	0	1	1	1	1	0	0	0	0	0	1	0	0	40250034	0	1	3	3	40250034	402500	0	-1.4	-.88	-1.44
4025003402	10	1	2	0	0	1	37.9	0	1	2	1	1	1	0	0	0	1	1	0	0	40250034	0	1	1	1	40250034	402500	0	-1.47	-.56	-1.25
4025003403	10	1	1	0	1	1	37.5	0	1	2	0	1	0	0	0	0	0	1	1	0	40250034	0	1	3	3	40250034	402500	0	-.74	-1.01	-1.17
4025003405	10	1	1	0	0	1	38.8	0	1	4	1	0	0	0	0	0	1	1	1	0	40250034	0	2	3	1	40250034	402500	0	-.79	-.59	-.89
4025003406	10	1	1	1	1	1	24.9	0	1	1	1	1	1	0	0	0	0	1	1	1	40250034	1	1	1	3	40250034	402500	0	-.69	-.68	-.83
4025003407	10	1	1	1	1	1	29.7	0	1	4	0	0	0	1	0	0	1	1	1	1	40250034	0	2	3	1	40250034	402500	0	-.7	-.46	-.75
4025003408	10	1	1	0	1	1	20.8	0	1	4	1	0	0	0	0	0	1	1	1	0	40250034	0	2	2	1	40250034	402500	0	-1.07	.17	-.72
4025003410	10	1	1	0	0	1	33.4	0	1	6	1	0	0		0	0	1	1	1	0	40250034	0	3	2	1	40250034	402500	0	-.51	-.38	-.52
4025003413	10	1	1	0	1	1		0	1	5	0	0	0	0	0	0	1	0	0	0	40250034	0	3	2	1	40250034	402500	0	-.31	-.64	-.51
4025003414	10	1	2	1	1	1	24.2	0	1	3	0	0	0	0	0	0	1	1	0	0	40250034	1	2	3	1	40250034	402500	0	-.2	-.53	-.39
4025004101	10	1	3	1	1	1	22.3	0	1	1	0	1	0	0	0	0	0	1	0	0	40250041	0	1	2	3	40250041	402500	0	-.23	.09	-.17
4025004104	10	1	1	1	1	1	22.7	0	1	3	0	0	0	0	0	1	1	1	0	0	40250041	0	2	2	1	40250041	402500	0	.3	.08	.24
4025004105	10	1	2	0	1	1		0	1	5	1	0	0	0	0	0	1	0	0	0	40250041	0	3	2	1	40250041	402500	0	.05	.52	.25
4025004106	10	1	1	1	1	1	23.3	0	1	4	1	0	0	0	0	0	0	1	0	0	40250041	0	2	2	2	40250041	402500	0	.51	-.13	.32
4025004107	10	1	1	1	1	1		0	1	2	1	0	0	0	0	0	0	0	0	0	40250041	0	1	2	3	40250041	402500	0	-1.78	-1.46	-1.97
4025004108	10	1	1	1	1	1		0	1	3	1	0	0	0	0	0	1	0	0	0	40250041	0	2	2	1	40250041	402500	0	.85	-3.24	-1.34
4025004109	10	1	1	0	1	1	23.5	0	1	1	1	0	0	1	0	0	0	0	0	0	40250041	1	1	2	3	40250041	402500	0	-.38	-1.81	-1.22
4025004111	10	1	1	0	0	1	40.7	0	1	3	1	0	0	0	0	0	1	1	1	0	40250041	1	2	2	1	40250041	402500	0	-1.04	-.59	-.98
4025004114	10	1	3	1	1	1	22.3	0	1	4	0	0	0	0	0	0	1	1	1	0	40250041	0	2	2	1	40250041	402500	0	-.95	-.32	-.93
4025004115	10	1	1	0	1	1	24.3	0	1	5	1	0	0	0	0	0	1	1	0	0	40250041	0	3	2	1	40250041	402500	0	-.55	-.9	-.82
4025004116	10	1	1	0	1	1	26.8	0	1	2	1	0	0	0	0	0	0	1	1	0	40250041	0	1	2	3	40250041	402500	0	-1.22	.16	-.8
4025614101	10	0	3	0	1	1	27.8	1	1	1	0	1	1	0	0	0	0	1	0	0	40250041	0	1	1	3	40250041	402500	0	-1.78	1.39	-.75
4025614102	10	0	3	0	1	1	22.2	0	1	3	1	0	0	1	0	0	0	1	1	0	40250041	0	2	3	3	40250041	402500	0	-.93	.69	-.38
4025614103	10	0	2	1	0	0	37.7	0	1	3	1	1	1	1	0	0	0	0	1	0	40250041	0	2	1	3	40250041	402500	0	-.93	.66	-.13
4025614104	10	0	3	0	1	0	21.8	0	1	4	1	0	0	0	0	0	0	0	1	0	40250041	0	2	3	3	40250041	402500	0	-.39	.56	.15
4025614105	10	0	1	1	1	1	23.3	0	1	3	1	0	0	0	0	0	0	0	1	0	40250041	0	2	3	3	40250041	402500	0	-.39	.78	.22
4025614106	10	0	3	0	1	1	26.4	0	1	6	0	0	0	0	1	0	0	1	1	0	40250041	1	3	3	3	40250041	402500	0	-.07	.65	.24
4025614107	10	0	3	1	1	1	23.2	0	1	2	1	1	1	0	0	0	0	1	1	0	40250041	1	1	1	3	40250041	402500	0	.7	.82	1.05
4025614108	10	0	2	1	1	1		0	1	6	0	0	0	0	0	0	0	1	1	0	40250041	0	3	3	3	40250041	402500	0	-1.27	2.97	1.68
4025614109	10	0	3	1	1	1	21.7	0	1	5	1	0	0	0	0	0	0	1	0	0	40250041	0	3	3	3	40250041	402500	0	1.78	1.98	2.12
4025614110	10	0	3	0	1	1	33.3	0	1	5	0	0	1	1	1	0	0	1	1	0	40250041	0	3	1	3	40250041	402500	0	-1.15	-2.05	-1.85
4025614111	10	0	3	0	0	1	31	0	1	5	1	0	1	0	0	0	0	0	1	0	40250041	0	3	1	3	40250041	402500	0	-2.61	.81	-1.5
4025614112	10	0	3	1	1	1	22.2	0	1	3	1	0	1	0	0	0	0	1	1	0	40250041	0	2	1	3	40250041	402500	0	-1.37	-.99	-1.45
4025614113	10	0	2	1	0	1	27	0	1	2	1	0	1	0	0	0	0	1	1	0	40250041	1	1	1	3	40250041	402500	0	-1.91	-.3	-1.41
4025614114	10	0	3	0	1	1	26.8	0	1	4	1	0	1	0	1	1	0	0	1	0	40250041	1	2	1	3	40250041	402500	0	-.71	-.91	-.98
4025614115	10	0	3	0	1	1	23.1	0	1	2	0	1	1	0	0	0	0	0	1	0	40250041	0	1	1	3	40250041	402500	0	-1.76	.87	-.76
4025004201	10	1	3	0	0	1	29.2	0	1	2	0	0	0	0	0	0	0	1	0	0	40250042	1	1	2	3	40250042	402500	0	-.57	-.34	-.61
4025004202	10	1	2	1	1	1	24.3	0	1	5	1	0	0	0	0	0	1	0	0	0	40250042	0	3	2	1	40250042	402500	0	.45	-.78	-.37
4025004203	10	1	3	0	1	1	24.3	0	1	6	0	0	0	0	0	0	1	1	0	0	40250042	1	3	2	1	40250042	402500	0	.7	-1.81	-.3
4025004204	10	1	3	1	1	1	24.1	0	1	6	0	0	0	0	0	0	1	1	1	0	40250042	0	3	2	1	40250042	402500	0	.24	-1.03	-.3
4025004205	10	1	2	1	1	1	24.2	0	1	2	0	1	0	0	0	0	0	1	0	0	40250042	1	1	2	3	40250042	402500	0	-.01	-.58	-.29
4025004206	10	1	3	1	0	1	31.8	0	1	5	1	0	0	0	0	0	1	1	1	0	40250042	0	3	2	1	40250042	402500	0	.28	-.54	-.06
4025004207	10	1	2	1	0	1	29.3	0	1	2	0	0	0	0	0	0	0	1	0	0	40250042	1	1	2	3	40250042	402500	0	-.22	.29	-.02
4025004208	10	1	3	1	1	1	23.4	0	1	5	0	0	0	1	0	0	1	1	0	0	40250042	0	3	2	1	40250042	402500	0	-.19	.49	.06
4025004209	10	1	2	0	1	1	22.3	0	1	5	1	0	0	0	0	0	1	1	1	0	40250042	0	3	2	1	40250042	402500	0	-.48	1.02	.09
4025004210	10	1	1	0	1	1		0	1	6	0	0	0	0	0	0	1	0	0	0	40250042	0	3	2	1	40250042	402500	0	.44	.22	.43
4025004211	10	1	1	0	1	1	29.3	0	1	6	1	0	0	0	0	0	0	1	0	0	40250042	0	3	2	3	40250042	402500	0	-1.45	-1.03	-1.56
4025004212	10	1	1	0	1	1	23.1	1	1	2	1	1	0	0	0	0	0	0	0	0	40250042	0	1	2	3	40250042	402500	0	-1.25	-1.32	-1.52
4025004213	10	1	2	1	1	1	21.1	0	1	1	1	1	0	0	0	0	0	1	0	0	40250042	1	1	2	3	40250042	402500	0	-2.79	1.33	-1.44
4025004214	10	1	2	0	1	1	26.3	1	1	5	1	0	0	0	0	0	1	1	1	0	40250042	0	3	2	1	40250042	402500	0	-.79	-1.45	-1.24
4025004215	10	1	1	0	1	1	22.3	1	0	3	1	0	0	0	0	0	0	1	1	0	40250042	1	2	2	3	40250042	402500	0	-.74	-1.18	-1.23
4025004217	10	1	2	1	1	1	24.1	0	1	2	0	1	0	0	0	0	1	0	1	1	40250042	0	1	2	1	40250042	402500	0	-.94	-.87	-1.11
4025614201	10	0	2	1	1	1	29.1	0	1	5	1	0	0	0	1	0	0	1	1	0	40250042	0	3	3	3	40250042	402500	0	-1.45	.07	-1.07
4025614202	10	0	3	1	1	1	23.1	0	1	4	1	0	0	0	1	0	0	0	1	0	40250042	0	2	3	3	40250042	402500	0	-.54	-1.42	-1.03
4025614203	10	0	3	0	0	1	33	0	1	5	1	0	1	0	1	1	0	0	1	0	40250042	0	3	1	3	40250042	402500	0	-.75	-.88	-.98
4025614204	10	0	1	0	1	1	26.3	0	1	6	1	0	0	0	0	0	0	0	1	0	40250042	0	3	3	3	40250042	402500	0	-1.04	-.31	-.91
4025614206	10	0	3	1	1	1	25.2	0	1	2	1	1	1	0	0	0	0	1	1	0	40250042	1	1	1	3	40250042	402500	0	-.29	-.79	-.62
4025614207	10	0	3	0	1	1	25.8	0	1	5	0	0	0	0	0	0	0	0	1	0	40250042	0	3	3	3	40250042	402500	0	.32	-.59	-.09
4025614208	10	0	3	1	1	1	25.5	0	1	2	1	0	1	0	0	0	0	1	0	0	40250042	0	1	1	3	40250042	402500	0	-.32	.95	.22
4025614210	10	0	3	1	0	1	24.3	0	1	6	1	0	1	0	0	0	0	1	1	0	40250042	0	3	1	3	40250042	402500	0	.28	.56	.51
4025614211	10	0	2	1	1	1	27.5	1	1	5	1	0	0	0	0	0	0	1	0	0	40250042	0	3	3	3	40250042	402500	0	-1.07	4.28	.99
4025614212	10	0	1	1	1	1	23.3	0	1	4	1	0	1	0	0	0	0	1	1	1	40250042	0	2	1	3	40250042	402500	0	1.96	-.47	1.18
4025614213	10	0	1	0	1	1	21.5	0	1	2	0	1	0	0	0	0	0	0	1	0	40250042	1	1	3	3	40250042	402500	0	-1.57	-2.62	-2.62
4025614214	10	0	3	0	1	1	28.3	0	1	2	1	1	1	0	0	0	0	1	1	1	40250042	1	1	1	3	40250042	402500	0	-1.84	-1.55	-2.08
4025004301	10	1	2	0	1	1		0	1	4	1	0	0	0	0	0	1	0	0	0	40250043	1	2	3	1	40250043	402500	0	-1.98	-1.22	-1.99
4025004302	10	1	1	1	1	1	23.6	0	1	6	1	0	0	0	0	0	1	1	1	0	40250043	0	3	3	1	40250043	402500	0	-1.16	-1.55	-1.56
4025004303	10	1	1	1	1	1	32.8	0	1	4	1	0	0	0	0	1	1	0	0	0	40250043	0	2	2	1	40250043	402500	0	-1.24	-1.27	-1.49
4025004304	10	1	1	0	1	1	23.6	0	1	3	1	0	1	0	0	0	1	1	0	0	40250043	0	2	1	1	40250043	402500	0	-1.29	-.65	-1.24
4025004305	10	1	1	1	1	1	20.6	0	1	2	0	0	1	0	0	0	1	1	1	0	40250043	0	1	1	1	40250043	402500	0	-.79	-.93	-1.18
4025004306	10	1	1	0	1	1	27.3	1	1	1	0	1	0	0	0	0	0	1	0	0	40250043	0	1	3	3	40250043	402500	0	-.85	-.98	-1.08
4025004307	10	1	1	0	0	1		0	1	4	1	0	0	0	0	0	1	0	0	0	40250043	0	2	3	1	40250043	402500	0	-.65	-.94	-1.05
4025004308	10	1	1	1	1	1	23.4	0	1	2	0	1	1	1	0	0	1	1	1	0	40250043	0	1	1	1	40250043	402500	0	-.07	-.84	-.61
4025004309	10	1	1	0	1	1		0	1	5	0	0	0	0	0	0	1	0	0	0	40250043	1	3	3	1	40250043	402500	0	-.14	-1.11	-.6
4025004310	10	1	1	0	0	1		0	1	6	1	0	0	0	0	0	1	0	0	0	40250043	0	3	2	1	40250043	402500	0	-.74	.04	-.59
4025004311	10	1	2	0	0	0	32.7	0	1	3	0	0	0	0	0	0	1	1	1	0	40250043	0	2	3	1	40250043	402500	0	-.3	-.56	-.54
4025004312	10	1		0	1	0	26.8	0	1	2	1	0	1	0	0	0	1	1	1	0	40250043	0	1	1	1	40250043	402500	0	-.13	-.18	-.22
4025004313	10	1	2	1	1	1	25.7	0	1	3	0	0	0	0	0	0	1	1	1	1	40250043	0	2	3	1	40250043	402500	0	1.02	-1.27	-.02
4025004314	10	1	1	0	1	1	36.7	0	1	4	0	0	1	1	0	0	1	1	0	0	40250043	0	2	1	1	40250043	402500	0	-1.01	-1.72	-1.7
4025004315	10	1	1	0	1	1		0	1	5	0	0	0	1	1	0	1	0	0	0	40250043	0	3	3	1	40250043	402500	0	-.72	-1.32	-1.23
4025004316	10	1	2	0	1	1		0	1	4	0	0	1	1	0	0	1	1	1	0	40250043	1	2	1	1	40250043	402500	0	-.83	-1.14	-1.18
4025614301	10	0	3	1	1	1	31	0	1	3	1	0	0	0	1	0	0	1	0	0	40250043	0	2	3	3	40250043	402500	0	-1.25	-.26	-1.13
4025614302	10	0	1	0	0	0	31.6	0	1	3	0	1	1	1	1	0	0	0	1	0	40250043	1	2	1	3	40250043	402500	0	-.51	-.92	-.84
4025614303	10	0	3	1	1	1	20.8	0	1	3	0	0	0	1	0	0	0	1	1	0	40250043	0	2	3	3	40250043	402500	0	-.71	-.69	-.81
4025614304	10	0	3	1	1	1	23.1	0	1	5	1	0	0	0	1	1	0	1	1	0	40250043	0	3	3	3	40250043	402500	0	-.27	-.85	-.65
4025614305	10	0	1	0	1	1	23.9	0	1	1	0	1	0	0	0	0	0	1	1	0	40250043	0	1	3	3	40250043	402500	0	-.66	-.22	-.56
4025614306	10	0	2	0	0	0	32	0	1	4	1	0	0	0	0	0	0	0	1	0	40250043	0	2	3	3	40250043	402500	0	-1.17	.65	-.55
4025614308	10	0	3	1	1	1	23.8	0	1	3	0	0	1	0	0	0	0	1	0	0	40250043	0	2	1	3	40250043	402500	0	1.14	-1.85	-.04
4025614309	10	0	2	1	1	1	22	0	1	3	0	0	0	0	0	0	0	1	1	0	40250043	0	2	3	3	40250043	402500	0	-.66	1.39	.21
4025614310	10	0	3	0	0	1	33.4	0	1	1	1	1	1	0	0	0	0	1	0	0	40250043	0	1	1	3	40250043	402500	0	1.24	-1.5	.28
4025004401	10	1	3	1	1	0	23.4	0	1	5	1	0	0	0	0	0	1	1	0	0	40250044	0	3	3	1	40250044	402500	0	.52	.02	.42
4025004402	10	1	3	0	1	0	31.8	0	1	3	0	0	1	0	0	0	1	1	1	0	40250044	0	2	1	1	40250044	402500	0	-.38	1.55	.85
4025004403	10	1	2	0	1	1		0	1	6	1	0	0	0	0	0	1	1	1	0	40250044	0	3	3	1	40250044	402500	0	-.63	4.2	1.27
4025004404	10	1	2	0	1	1		0	1	3	0	0	0	1	0	0	1	1	1	0	40250044	0	2	3	1	40250044	402500	0	-2.81	-3.61	-3.82
4025004405	10	1	3	0	1	1	22.9	0	1	2	0	0	0	0	0	0	0	1	1	0	40250044	1	1	3	3	40250044	402500	0	-1.77	-2.3	-2.63
4025004406	10	1	1	0	1	1		0	1	3	1	0	1	0	0	0	0	0	0	0	40250044	0	2	1	3	40250044	402500	0	-1.64	-2.66	-2.52
4025004407	10	1	2	0	1	1	23.3	0	1	1	1	1	1	1	1	0	0	1	1	0	40250044	0	1	1	3	40250044	402500	0	-2.08	-1.77	-2.42
4025004408	10	1	1	1	1	1	23	0	1	2	1	1	0	0	0	0	0	0	0	0	40250044	1	1	3	3	40250044	402500	0	-.48	-2.67	-1.83
4025004409	10	1	3	0	1	1	37.8	0	1	4	0	0	0	0	0	0	1	1	0	0	40250044	0	2	3	1	40250044	402500	0	-1.15	-2.04	-1.83
4025004410	10	1	3	1	1	1		0	1	3	1	0	1	1	0	0	1	1	1	0	40250044	0	2	1	1	40250044	402500	0	-1.92	-.8	-1.75
4025004411	10	1	3	1	1	0	31	0	1	4	0	0	1	0	0	0	1	1	0	0	40250044	0	2	1	1	40250044	402500	0	-.81	-2.05	-1.69
4025004412	10	1	3	1	1	1	30	0	1	6	0	0	0	0	0	0	1	1	1	0	40250044	0	3	3	1	40250044	402500	0	-1.19	-1.27	-1.53
4025004413	10	1	3	0	1	0	23.9	1	1	5	1	0	1	1	0	0	1	1	0	0	40250044	0	3	1	1	40250044	402500	0	-.24	-1.52	-.97
4025004414	10	1	3	0	1	1	22.6	1	1	2	0	0	1	0	0	0	1	1	0	0	40250044	0	1	1	1	40250044	402500	0	-1.39	.29	-.78
4025004415	10	1	3	1	0	1	37.3	0	1	6	0	0	1	0	0	0	1	1	1	0	40250044	0	3	1	1	40250044	402500	0	.35	-1.81	-.62
4025004416	10	1	3	0	1	1		0	1	6	1	0	0	0	0	0	1	1	1	0	40250044	0	3	3	1	40250044	402500	0	.1	-.66	-.37
4025005101	10	1	1	0	1	1	22.3	0	0	2	1	0	0	0	0	0	1	1	1	0	40250051	0	1	2	1	40250051	402500	0	.44	-.97	-.36
4025005101	10	0	3	1	1	1	22.8	0	1	2	0	0	0	0	0	0	0	1	0	0	40250051	1	1	2	3	40250051	402500	0	-1.21	2.08	.66
4025005102	10	1	1	1	0	1		0	1	3	1	0	0	0	0	0	1	1	0	0	40250051	1	2	2	1	40250051	402500	0	1.4	-.21	.88
4025005102	10	0	1	1	1	0	22.8	0	1	2	1	1	0	0	0	0	0	0	1	0	40250051	0	1	2	3	40250051	402500	0	-1.34	-.48	-1.17
4025005103	10	1	1	0	1	1	33.2	0	1	5	1	0	0	0	0	0	1	1	1	0	40250051	0	3	2	1	40250051	402500	0	-.41	-.42	-.49
4025005103	10	0	2	0	1	1	22.5	0	1	2	1	1	0	1	0	0	0	1	1	0	40250051	0	1	2	3	40250051	402500	0	-.76	.09	-.49
4025005104	10	1	1	1	1	1	22.6	0	0	4	0	0	0	0	0	1	1	1	1	0	40250051	0	2	2	1	40250051	402500	0	-1.19	.75	-.43
4025005104	10	0	1	1	1	1	26.5	0	1	3	0	0	0	0	0	0	0	1	1	0	40250051	1	2	2	3	40250051	402500	0	-.43	-.21	-.37
4025005105	10	1	1	0	1	1	25.8	1	1	2	0	0	0	0	0	0	0	1	1	0	40250051	0	1	2	2	40250051	402500	0	1.35	-1.26	-.2
4025005105	10	0	2	1	1	1	27.5	0	1	6	0	0	0	0	0	0	0	1	0	1	40250051	1	3	2	3	40250051	402500	0	-.84	.79	-.18
4025005106	10	1	1	1	0	1	33.3	0	1	6	1	0	0	1	0	0	1	1	1	0	40250051	0	3	2	1	40250051	402500	0	-.07	-.05	-.13
4025005106	10	0	3	0	0	1	38.3	0	1	2	0	1	0	0	0	0	0	1	0	0	40250051	0	1	2	3	40250051	402500	0	.56	-.85	-.11
4025005107	10	1	3	1	1	1	23.5	0	1	4	0	0	0	0	0	0	1	1	1	0	40250051	1	2	2	1	40250051	402500	0	-.02	-.27	-.1
4025005107	10	0	3	1	1	1	23.9	0	1	6	1	0	0	1	1	0	0	1	1	0	40250051	0	3	2	3	40250051	402500	0	.74	-.78	.19
4025005108	10	1	1	0	1	1	22.5	0	1	2	1	1	0	0	0	0	0	1	0	0	40250051	1	1	2	3	40250051	402500	0	1.27	-.82	.48
4025005108	10	0	3	1	1	0	28	0	1	4	0	0	0	0	0	0	0	1	1	0	40250051	0	2	2	3	40250051	402500	0	.87	.42	.83
4025005109	10	1	1	1	1	1	41.7	0	1	5	0	0	0	0	0	0	1	1	1	0	40250051	0	3	2	1	40250051	402500	0	-.29	3.12	1.35
4025005109	10	0	2	1	1	1	23.3	0	1	2	1	1	0	0	0	0	0	0	1	1	40250051	1	1	2	3	40250051	402500	0	1.34	.86	1.59
4025005110	10	1	1	0	1	1	24.3	0	1	6	1	0	0	0	0	0	1	1	0	0	40250051	1	3	2	1	40250051	402500	0	3.13	2.28	3.64
4025005110	10	0	3	0	1	0	24.5	0	1	2	1	0	0	0	0	0	0	1	1	0	40250051	1	1	2	3	40250051	402500	0	-3.1	-1.2	-2.83
4025005111	10	1	1	1	1	1	24.8	0	1	5	0	0	0	0	0	0	1	1	0	0	40250051	1	3	2	1	40250051	402500	0	-3.03	-1.11	-2.67
4025005111	10	0	3	0	0	1	27.8	0	1	1	1	1	0	1	0	0	0	1	1	0	40250051	0	1	2	3	40250051	402500	0	-2.04	-1.35	-2.08
4025005112	10	1	1	0	1	1	24.7	0	1	5	0	0	0	1	0	0	1	1	1	0	40250051	0	3	2	1	40250051	402500	0	-1.88	-1.3	-1.92
4025005112	10	0	2	0	1	1	27.3	1	1	3	1	0	0	0	0	0	0	0	1	1	40250051	1	2	2	3	40250051	402500	0	-.23	-3.48	-1.87
4025005113	10	1	2	0	1	1	23.8	0	1	1	0	1	0	0	0	0	0	1	1	1	40250051	1	1	2	3	40250051	402500	0	-1.72	-1.18	-1.85
4025005113	10	0	1	1	1	1	31	0	1	2	1	1	0	1	0	0	0	1	1	0	40250051	0	1	2	3	40250051	402500	0	-1.05	-1.59	-1.51
4025005114	10	1	1	0	1	1	33.4	0	1	6	1	0	0	0	0	0	1	1	1	0	40250051	1	3	2	1	40250051	402500	0	-.96	-1.56	-1.47
4025005114	10	0	3	0	0	0	38.3	0	1	5	0	0	0	0	1	0	0	1	1	0	40250051	0	3	2	3	40250051	402500	0	-1.45	-.62	-1.41
4025005115	10	1	1	0	1	1		0	1	3	1	0	0	0	0	0	1	1	1	0	40250051	0	2	2	1	40250051	402500	0	-.63	-1.28	-1.13
4025005115	10	0	3	1	1	1	25.8	0	1	4	0	0	0	0	0	0	0	1	1	0	40250051	1	2	2	3	40250051	402500	0	-1.37	.33	-.89
4025005116	10	1	3	0	1	1	19.6	0	1	3	1	0	0	0	0	0	1	0	0	0	40250051	0	2	2	1	40250051	402500	0	-1.13	-.27	-.88
4025005117	10	1	1	1	1	1	25	0	1	1	0	1	0	0	0	0	0	1	1	0	40250051	0	1	2	2	40250051	402500	0	-1.15	.28	-.77
4025005201	10	1	1	0	1	1	26.7	0	1	5	1	0	0	0	0	0	1	1	0	0	40250052	0	3	2	1	40250052	402500	0	-.61	.45	-.27
4025005201	10	0	3	1	0	1	27.6	0	1	2	1	0	0	0	0	0	0	1	1	0	40250052	0	1	2	3	40250052	402500	0	-.47	.74	.17
4025005202	10	1	2	0	0	1		0	1	3	1	0	0	1	0	0	1	0	0	0	40250052	0	2	2	1	40250052	402500	0	-.41	1.55	.65
4025005202	10	0	3	0	1	1	24.6	1	1	6	1	0	0	0	0	0	0	1	1	0	40250052	1	3	2	3	40250052	402500	0	-.4	-.56	-.6
4025005203	10	1	3	0	1	1		0	1	5	1	0	0	0	0	0	1	1	1	0	40250052	0	3	2	1	40250052	402500	0	-1.14	.69	-.46
4025005203	10	0	2	0	1	1	29.3	0	1	3	0	0	0	1	0	0	0	1	1	1	40250052	0	2	2	3	40250052	402500	0	0	-.68	-.37
4025005204	10	1	1	0	1	1	21.7	0	1	2	1	1	0	0	0	0	1	1	1	0	40250052	1	1	2	1	40250052	402500	0	.16	-.63	-.22
4025005204	10	0	3	1	1	1	23.3	0	1	3	1	0	0	1	1	0	0	1	1	0	40250052	0	2	2	3	40250052	402500	0	-.08	-.31	-.2
4025005205	10	1	1	1	0	1	26.8	1	1	4	0	0	0	0	0	0	1	1	0	0	40250052	0	2	2	1	40250052	402500	0	-.19	-.16	-.2
4025005205	10	0	3	1	1	0	23	0	1	4	1	0	0	0	0	0	0	1	1	0	40250052	0	2	2	3	40250052	402500	0	.96	-1.09	.13
4025005206	10	1	1	1	1	1	26.3	0	1	4	1	0	0	0	0	0	1	1	0	0	40250052	0	2	2	1	40250052	402500	0	-.46	.79	.17
4025005206	10	0	3	1	0	1	30.6	0	1	1	1	1	0	0	0	0	0	1	0	0	40250052	0	1	2	3	40250052	402500	0	.78	-.62	.26
4025005207	10	1	1	0	1	1	23.2	1	1	5	0	0	0	0	0	0	1	1	1	0	40250052	0	3	2	1	40250052	402500	0	.51	-.26	.28
4025005207	10	0	3	1	0	1	30.6	0	1	1	1	1	0	0	0	0	0	1	0	0	40250052	0	1	2	3	40250052	402500	0	.18	.39	.3
4025005208	10	1	1	1	1	1	21.7	0	1	4	0	0	0	0	0	0	1	1	1	0	40250052	0	2	2	1	40250052	402500	0	.28	.4	.42
4025005208	10	0	2	1	1	1	25.8	1	1	4	0	0	0	0	0	0	0	1	1	0	40250052	0	2	2	3	40250052	402500	0	.29	.51	.46
4025005209	10	1	1	1	0	1	33	0	1	3	1	0	0	0	0	0	1	1	1	0	40250052	0	2	2	1	40250052	402500	0	-.01	1.12	.51
4025005209	10	0	3	1	1	1	27.8	0	1	2	1	1	0	0	0	0	0	1	1	0	40250052	0	1	2	3	40250052	402500	0	1.92	-1.75	.57
4025005210	10	1	1	1	1	1	25.4	0	1	4	1	0	0	0	0	0	1	1	1	0	40250052	0	2	2	1	40250052	402500	0	2.42	1.86	2.77
4025005211	10	1	1	1	1	1	23.6	0	1	3	1	0	0	0	0	0	1	1	0	0	40250052	0	2	2	1	40250052	402500	0		-.45	-4.36
4025005211	10	0	3	0	1	1	31.5	0	1	3	0	0	0	0	0	0	0	1	1	0	40250052	0	2	2	3	40250052	402500	0	-1.87	-1.94	-2.44
4025005212	10	1	1	1	1	1	33.5	0	1	1	1	1	0	0	0	0	0	1	1	0	40250052	1	1	2	2	40250052	402500	0	-1.6	-1.41	-1.92
4025005212	10	0	2	0	1	1	25	0	1	5	1	0	0	0	0	0	0	1	1	0	40250052	0	3	2	3	40250052	402500	0	-.6	-1.23	-1.09
4025005213	10	1	3	1	1	1	19.8	0	1	3	0	0	0	0	0	0	1	1	1	0	40250052	0	2	2	1	40250052	402500	0	-.53	-.91	-.84
4025005214	10	1	1	0	0	1	34.4	0	1	5	0	0	0	0	0	0	1	1	1	0	40250052	0	3	2	1	40250052	402500	0	-1	.12	-.66
4025005214	10	0	1	0	1	1	36.8	0	1	2	1	0	0	0	0	0	0	1	1	0	40250052	0	1	2	3	40250052	402500	0	.34	-1.78	-.56
4025005215	10	1	2	0	0	1	34.4	0	1	4	1	0	0	0	0	0	1	1	1	0	40250052	1	2	2	1	40250052	402500	0	1.2	-2.46	-.36
4025005215	10	0	3	1	1	1	26.3	0	1	5	1	0	0	0	0	0	0	1	1	0	40250052	1	3	2	3	40250052	402500	0	.07	-.8	-.3
4025005301	10	1	1	0	1	1	38.3	0	0	3	0	0	1	1	1	0	1	1	1	0	40250053	0	2	1	1	40250053	402500	0	-.51	.73	0
4025005301	10	0	3	0	1	1	25	0	1	4	1	0	0	0	0	0	0	0	1	0	40250053	1	2	2	3	40250053	402500	0	-1.13	1.47	.17
4025005302	10	1	2	0	1	1	26.8	0	1	2	1	1	1	0	0	0	0	1	0	0	40250053	0	1	1	3	40250053	402500	0	1.95	-.83	.64
4025005302	10	0	3	0	0	1	43.3	0	1	1	0	1	0	0	0	0	0	1	1	0	40250053	1	1	2	3	40250053	402500	0	1.29	-.57	.71
4025005303	10	1	1	1	1	1	21.8	0	1	2	0	1	1	0	0	0	0	1	1	0	40250053	1	1	1	3	40250053	402500	0	1.1	.36	1.01
4025005303	10	0	3	1	1	1	22.3	0	1	3	0	0	0	1	1	0	0	1	1	0	40250053	0	2	2	3	40250053	402500	0	2.3	-1.38	1.03
4025005304	10	1	3	0	1	1	22.4	0	1	2	1	0	1	0	0	0	0	1	1	0	40250053	0	1	1	3	40250053	402500	0	2.24	-1.09	1.05
4025005304	10	0	3	0	1	0	26.8	0	1	4	1	0	0	0	0	0	0	1	1	0	40250053	0	2	2	3	40250053	402500	0	-4.11	1.17	-2.48
4025005305	10	1	3	0	0	1	31.3	1	1	6	1	0	0	0	0	0	1	1	0	0	40250053	0	3	3	1	40250053	402500	0	-1.24	-1.66	-1.74
4025005305	10	0	2	1	1	1	23.2	1	1	3	1	0	0	1	0	0	0	1	1	1	40250053	0	2	2	3	40250053	402500	0	-1.39	-.8	-1.39
4025005306	10	1	1	1	1	1	22.7	0	1	2	0	0	1	0	0	0	0	1	1	0	40250053	0	1	1	3	40250053	402500	0	-.31	-1.78	-1.17
4025005306	10	0	3	1	0	1	29.2	0	1	3	0	1	0	0	0	0	0	1	1	0	40250053	0	2	2	3	40250053	402500	0	-.56	-1.26	-.98
4025005307	10	1	2	0	1	1	21.7	0	1	2	0	1	0	0	0	0	0	1	0	0	40250053	0	1	3	3	40250053	402500	0	-.5	-.6	-.63
4025005307	10	0	3	0	0	0	36.9	0	1	3	1	0	0	0	1	1	0	1	1	1	40250053	1	2	2	3	40250053	402500	0	-.81	.37	-.46
4025005308	10	1	1	0	1	1	23.4	0	1	3	1	1	1	0	1	1	1	1	0	0	40250053	0	2	1	1	40250053	402500	0	.71	-1.37	-.07
4025005308	10	0	2	0	0	1	28.8	0	1	6	1	0	0	0	0	0	0	1	0	0	40250053	0	3	2	3	40250053	402500	0	.37	-.15	.14
4025005309	10	1	2	0	1	1		0	1	4	0	0	1	0	0	0	1	1	1	0	40250053	0	2	1	1	40250053	402500	0	.72	.28	.66
4025005309	10	0	2	0	0	1	31.3	0	1	5	1	0	0	0	0	0	0	1	1	0	40250053	0	3	2	3	40250053	402500	0	.62	.66	.73
4025005310	10	1	1	1	1	1	23.6	0	1	4	0	0	1	0	0	0	1	1	1	0	40250053	0	2	1	1	40250053	402500	0	.7	1	.97
4025005310	10	0	2	0	1	1	23.5	0	1	2	0	1	0	1	1	0	0	0	1	0	40250053	0	1	2	3	40250053	402500	0	1.72	-.31	1.09
4025005311	10	1	2	0	1	1	33.8	0	1	3	0	0	0	0	0	0	1	1	1	0	40250053	0	2	3	1	40250053	402500	0	-.26	2.32	1.09
4025005311	10	0	3	1	1	1	24	0	1	2	1	0	0	0	0	0	0	1	1	0	40250053	1	1	2	3	40250053	402500	0	2.08	.17	1.62
4025005312	10	1	1	0	1	1	22.3	0	1	4	1	0	1	0	0	0	1	0	0	0	40250053	0	2	1	1	40250053	402500	0	1.95	1.85	2.19
4025005312	10	0	3	0	1	1	25	0	1	6	1	0	0	0	0	0	0	1	1	0	40250053	0	3	2	3	40250053	402500	0	-2.19	-1.17	-2.06
4025005313	10	1	1	0	0	1	29.8	0	1	2	0	1	1	0	0	0	0	1	1	0	40250053	1	1	1	3	40250053	402500	0	.79	-4.31	-2.02
4025005313	10	0	3	1	1	1	28.5	0	0	1	0	1	0	0	0	0	0	1	1	0	40250053	0	1	2	3	40250053	402500	0	-.36	-2.71	-2
4025005314	10	1	1	1	1	1	23.3	0	1	3	1	0	1	0	0	0	1	1	0	0	40250053	0	2	1	1	40250053	402500	0	-1.38	-.66	-1.34
4025005315	10	1	1	0	1	1	25.3	0	1	6	0	0	0	0	0	0	1	1	1	0	40250053	0	3	3	1	40250053	402500	0	.21	-2.86	-1.2
4025005401	10	1	3	1	1	1	23.3	1	1	4	0	0	0	0	0	0	1	1	1	0	40250054	0	2	3	1	40250054	402500	0	-1.01	-.93	-1.2
4025005402	10	1	1	0	1	1	23.5	1	1	2	1	0	0	0	0	0	0	1	1	0	40250054	0	1	3	3	40250054	402500	0	-1.4	.31	-.92
4025005403	10	1	1	0	1	1	35.4	0	1	4	0	0	0	0	0	0	1	1	1	0	40250054	0	2	3	1	40250054	402500	0	-1.26	.19	-.88
4025005404	10	1	1	0	1	1	24.8	1	1	4	1	0	0	0	0	0	1	1	0	0	40250054	0	2	3	1	40250054	402500	0	-.24	-.86	-.76
4025005405	10	1	2	1	1	1	31	1	1	6	0	0	1	0	0	0	1	1	1	0	40250054	0	3	1	1	40250054	402500	0	.48	-2	-.58
4025005406	10	1	1	1	1	1	26.8	1	1	2	0	1	0	0	0	0	0	1	0	0	40250054	0	1	3	3	40250054	402500	0	-.24	-.74	-.54
4025005407	10	1	1	1	1	1	23.7	1	1	5	0	0	1	0	0	0	1	1	1	0	40250054	1	3	1	1	40250054	402500	0	-1.28	.65	-.48
4025005408	10	1	3	0	1	1	23.7	0	1	5	0	0	0	0	0	0	1	1	1	0	40250054	0	3	3	1	40250054	402500	0	.22	-1.18	-.47
4025005409	10	1	3	0	1	0	22.8	0	1	3	0	0	0	0	0	0	1	1	0	0	40250054	0	2	3	1	40250054	402500	0	1.08	-1	.31
4025005410	10	1	1	1	1	1	24.8	0	1	4	1	0	0	0	0	0	1	1	1	0	40250054	1	2	3	1	40250054	402500	0	.48	.42	.55
4025005411	10	1	1	1	1	1	28.8	0	1	1	1	1	0	0	0	0	0	1	0	0	40250054	0	1	2	3	40250054	402500	0	.58	.96	1.05
4025005412	10	1	1	1	0	1	31.8	0	1	1	1	1	1	0	0	0	0	1	1	0	40250054	1	1	1	3	40250054	402500	0	.72	-4.2	-2.02
4025005413	10	1	1	1	1	1	24.7	0	1	1	1	1	0	0	0	0	0	1	0	0	40250054	0	1	3	3	40250054	402500	0	.05	-2.02	-.96
4025005414	10	1	1	0	1	1	22	0	1	3	1	0	0	0	0	0	1	1	0	0	40250054	0	2	3	1	40250054	402500	0	-.93	-.34	-.82
4025005415	10	1	1	1	1	1	29.1	0	1	5	1	0	1	0	0	0	1	1	1	0	40250054	0	3	1	1	40250054	402500	0	.47	-2.01	-.76
4025005416	10	1	3	1	1	1	25.3	0	1	1	0	1	1	0	0	0	0	1	0	0	40250054	0	1	1	3	40250054	402500	0	-1.2	.51	-.63
4025616101	10	0	3	1	1	1	26.3	0	1	6	0	0	0	0	0	0	0	1	1	0	40250061	0	3	3	3	40250061	402500	0	1.04	-1.75	-.21
4025616102	10	0	3	0	1	1	28.2	0	1	6	1	0	0	0	0	0	0	1	1	0	40250061	0	3	3	3	40250061	402500	0	-.92	.82	-.21
4025616103	10	0	3	1	0	1	35.1	1	1	4	1	0	0	0	0	0	0	1	0	0	40250061	0	2	3	3	40250061	402500	0	-.02	.05	.02
4025616104	10	0	3	0	0	1	34.4	0	1	2	0	1	0	0	0	0	0	1	1	0	40250061	0	1	3	3	40250061	402500	0	.21	-.03	.14
4025616105	10	0	3	1	1	1	27.9	0	1	4	0	0	1	0	0	0	0	1	1	0	40250061	1	2	1	3	40250061	402500	0	.3	-.09	.23
4025616106	10	0	3	0	1	1	23.9	1	1	4	1	0	0	0	0	0	0	1	0	0	40250061	0	2	3	3	40250061	402500	0	.82	.26	.73
4025616107	10	0	2	0	0	1	31.3	0	1	4	1	0	0	0	0	0	0	1	1	0	40250061	0	2	3	3	40250061	402500	0	1.81	-.72	.95
4025616108	10	0	3	0	1	1	21.8	0	1	2	0	0	0	0	0	0	0	1	1	0	40250061	0	1	3	3	40250061	402500	0	1.08	.44	1.07
4025616109	10	0	3	0	1	1	24.8	0	1	3	1	0	0	0	0	0	0	1	0	0	40250061	1	2	3	3	40250061	402500	0	1	.86	1.09
4025616110	10	0	1	1	1	1	26.9	0	1	4	1	0	0	1	1	0	0	1	1	0	40250061	1	2	3	3	40250061	402500	0	1.01	2.16	1.64
4025616111	10	0	2	0	1	1	23.1	0	1	2	1	0	0	0	0	0	0	0	1	1	40250061	1	1	3	3	40250061	402500	0	-.03	4.24	1.87
4025616112	10	0	1	1	1	1	22.8	0	1	1	0	1	1	0	0	0	0	1	1	0	40250061	0	1	1	3	40250061	402500	0	-1.32	-.55	-1.22
4025616113	10	0	1	1	1	1	27.5	0	1	2	1	1	0	0	0	0	0	1	1	0	40250061	0	1	3	3	40250061	402500	0	-1.64	.02	-1.22
4025616114	10	0	1	1	0	1	25.8	0	1	1	0	1	0	0	0	0	0	1	1	0	40250061	0	1	3	3	40250061	402500	0	-.51	-.9	-.97
4025616115	10	0	3	1	1	1	23	0	1	3	1	0	0	0	0	0	0	1	0	0	40250061	0	2	3	3	40250061	402500	0	-1.41	.47	-.75
4025616116	10	0	3	1	0	1	24.9	0	1	4	1	0	0	0	0	0	0	1	0	0	40250061	0	2	3	3	40250061	402500	0	-.82	.06	-.61
4025616117	10	0	2	0	1	1	25.3	0	1	4	1	0	1	0	0	0	0	1	1	0	40250061	0	2	1	3	40250061	402500	0	.53	-2	-.54
4025616118	10	0	3	1	1	1	24.8	0	1	6	0	0	0	0	0	0	0	1	1	0	40250061	0	3	3	3	40250061	402500	0	.47	-1.6	-.53
4025616201	10	0	3	0	0	1	27.2	0	0	2	0	1	1	0	1	0	0	1	1	0	40250062	1	1	1	3	40250062	402500	0	.3	-1.31	-.38
4025616202	10	0	3	0	0	1	22.9	0	1	3	1	0	0	0	0	0	0	0	1	0	40250062	0	2	3	3	40250062	402500	0	.53	-1.41	-.24
4025616203	10	0	3	0	1	1	26.9	0	1	6	1	0	0	0	0	0	0	0	0	0	40250062	0	3	3	3	40250062	402500	0	1.28	-1.65	-.15
4025616204	10	0	3	0	1	1	25.3	0	1	2	1	1	0	0	0	0	0	1	1	0	40250062	1	1	3	3	40250062	402500	0	-.16	.02	-.08
4025616205	10	0	3	1	1	1	26.2	0	1	5	0	0	0	1	0	0	0	1	1	0	40250062	0	3	3	3	40250062	402500	0	.22	-.17	.1
4025616206	10	0	2	1	1	1	21.8	0	1	1	0	1	1	0	0	0	0	1	1	0	40250062	0	1	1	3	40250062	402500	0	.44	-.13	.23
4025616207	10	0	3	1	1	1	22.1	0	1	1	1	1	0	0	0	0	0	1	1	0	40250062	0	1	3	3	40250062	402500	0	1.41	-1.78	.25
4025616208	10	0	3	1	1	1	26.7	0	1	2	1	0	1	0	0	0	0	1	1	0	40250062	1	1	1	3	40250062	402500	0	.02	.36	.26
4025616209	10	0	3	0	0	1	26.1	0	1	4	0	0	0	0	0	0	0	1	1	0	40250062	1	2	3	3	40250062	402500	0	-.23	1.97	.94
4025616210	10	0	3	1	1	1	30.2	0	1	2	1	1	0	0	0	0	0	1	1	0	40250062	0	1	2	3	40250062	402500	0	-.92	-1.09	-1.16
4025616211	10	0	3	0	0	1	32.7	0	1	1	0	1	0	0	0	0	0	1	1	0	40250062	1	1	2	3	40250062	402500	0	-.6	-1.14	-1.03
4025616212	10	0	3	0	1	1	26.8	0	1	4	1	0	0	0	0	0	0	1	1	1	40250062	0	2	2	3	40250062	402500	0	-.37	-1.33	-.97
4025616213	10	0	2	1	1	1	27.5	0	1	2	1	0	0	0	0	0	0	1	0	0	40250062	1	1	2	3	40250062	402500	0	-.09	-1.04	-.59
4025616214	10	0	3	0	1	1	25	1	1	1	0	1	0	0	0	0	0	1	0	0	40250062	0	1	2	3	40250062	402500	0	.29	-.79	-.14
4025616215	10	0	3	0	1	1	24.6	0	1	2	1	1	0	0	0	0	0	1	1	0	40250062	0	1	2	3	40250062	402500	0	.88	-1.48	-.11
4025616216	10	0	2	1	1	1	21.2	0	1	2	0	0	0	0	0	0	0	1	1	0	40250062	1	1	2	3	40250062	402500	0	-.33	.39	-.07
4025616217	10	0	3	0	0	1	33.5	0	1	2	1	0	0	0	0	0	0	1	1	1	40250062	1	1	2	3	40250062	402500	0	-.73	.73	-.01
4025616218	10	0	1	1	1	1	21.6	0	1	2	1	0	0	0	0	0	0	1	1	0	40250062	1	1	2	3	40250062	402500	0	-.33	.7	.1
4025616301	10	0	3	0	1	1	25.9	0	1	4	0	0	0	0	0	0	0	1	0	0	40250063	0	2	2	3	40250063	402500	0	.37	-.31	.16
4025616302	10	0	3	1	1	1	27.3	0	1	4	1	0	0	0	0	0	0	1	1	1	40250063	1	2	2	3	40250063	402500	0	1	-.61	.45
4025616303	10	0	2	0	0	1	35.8	0	1	2	1	1	0	0	0	0	0	1	1	1	40250063	0	1	2	3	40250063	402500	0	-1.65	2.91	.54
4025616304	10	0	3	0	1	1	25.3	1	1	6	1	0	0	0	0	0	0	1	1	0	40250063	0	3	2	3	40250063	402500	0	-.86	1.9	.62
4025616305	10	0	3	0	1	1	25.2	0	1	2	1	1	0	0	0	0	0	1	1	0	40250063	0	1	2	3	40250063	402500	0	1.36	-.85	.65
4025616307	10	0	3	0	1	1	22.1	0	1	2	0	1	0	0	0	0	0	1	1	0	40250063	1	1	3	3	40250063	402500	0	1.59	-.3	1.09
4025616308	10	0	3	1	0	1	22.9	0	1	2	1	0	1	0	0	0	0	1	1	0	40250063	0	1	1	3	40250063	402500	0	1.03	2.69	1.9
4025616309	10	0	3	0	1	1	23	0	1	4	1	0	0	0	0	0	0	1	1	0	40250063	1	2	3	3	40250063	402500	0	.87	-3.73	-2.03
4025616310	10	0	3	1	1	1	22.3	0	1	3	1	0	1	0	0	0	0	1	1	0	40250063	0	2	1	3	40250063	402500	0	-1.15	-2.25	-2.02
4025616311	10	0	3	0	1	1	26.8	0	1	3	0	0	0	0	0	0	0	1	1	0	40250063	0	2	2	3	40250063	402500	0	.2	-1.82	-.86
4025616312	10	0	3	0	1	0	23.4	0	1	4	0	0	0	0	0	0	0	1	1	0	40250063	0	2	2	3	40250063	402500	0	-.72	-.36	-.77
4025616313	10	0	3	0	1	1	28.5	0	1	5	1	0	0	0	0	0	0	1	1	0	40250063	0	3	2	3	40250063	402500	0	-.28	-1.09	-.74
4025616314	10	0	3	1	1	1	26.3	0	1	3	1	0	0	0	0	0	0	1	1	0	40250063	1	2	2	3	40250063	402500	0	-.77	.19	-.44
4025616315	10	0	3	1	1	1	30.6	0	1	4	1	0	0	0	0	0	0	1	0	0	40250063	0	2	2	3	40250063	402500	0	1.16	-1.61	-.04
4025616316	10	0	3	0	1	1	26	1	1	5	0	0	0	0	0	0	0	1	0	0	40250063	0	3	2	3	40250063	402500	0	.31	-.64	-.04
4025616317	10	0	3	1	1	1	28.2	1	1	3	1	0	0	0	0	0	0	1	0	0	40250063	0	2	2	3	40250063	402500	0	-.24	1.26	.37
4025616318	10	0	3	0	1	1	27.3	0	1	3	0	0	0	0	0	0	0	1	1	0	40250063	0	2	2	3	40250063	402500	0	.17	.66	.69
4025616401	10	0	3	0	1	1	25.3	1	1	5	1	0	0	0	0	0	0	1	0	0	40250064	0	3	2	3	40250064	402500	0	.96	.04	.73
4025616402	10	0	2	1	1	1	28.3	1	1	6	0	0	0	0	0	0	0	1	1	0	40250064	0	3	2	3	40250064	402500	0	2.23	-1.39	.8
4025616403	10	0	3	1	1	1	24	0	1	6	0	0	0	0	1	0	0	1	1	1	40250064	0	3	2	3	40250064	402500	0	.25	1.37	.8
4025616404	10	0	2	1	1	1	30.7	1	1	5	0	0	0	0	0	0	0	1	0	0	40250064	1	3	2	3	40250064	402500	0	1.9	-.91	.9
4025616405	10	0	3	0	1	1	29.1	0	1	5	1	0	0	1	1	0	0	1	0	0	40250064	0	3	2	3	40250064	402500	0	1.55	.06	1.17
4025616406	10	0	3	1	1	1	27.2	0	1	3	1	0	0	0	0	0	0	1	1	0	40250064	0	2	2	3	40250064	402500	0	1.33	.47	1.25
4025616407	10	0	3	1	1	1	24.8	0	1	5	0	0	0	0	0	0	0	1	1	1	40250064	1	3	2	3	40250064	402500	0	.36	-2.25	-.95
4025616408	10	0	3	0	1	1	25.7	1	1	3	0	0	0	0	0	0	0	1	1	0	40250064	0	2	2	3	40250064	402500	0	.05	-1.51	-.78
4025616409	10	0	2	1	1	0	23.5	0	1	2	0	1	0	0	0	0	0	1	1	0	40250064	0	1	3	3	40250064	402500	0	.9	-1.58	-.21
4025616410	10	0	2	1	1	1	25.3	0	1	5	1	0	0	0	0	0	0	1	1	0	40250064	0	3	3	3	40250064	402500	0	.58	-1.17	-.2
4025616411	10	0	3	0	1	1	24.1	0	1	3	0	0	0	0	0	0	0	1	1	0	40250064	0	2	2	3	40250064	402500	0	-.21	-.13	-.19
4025616412	10	0	1	0	1	1	25.8	0	1	3	1	0	0	0	0	0	0	1	1	0	40250064	0	2	2	3	40250064	402500	0	.39	-1.02	-.15
4052001101	10	1	3	0	1	1	24.6	0	1	6	1	0	1	1	0	0	1	1	0	0	40520011	0	3	1	1	40520011	405200	0	.85	-1.43	-.13
4052001102	10	1	3	1	1	1	23.8	0	1	3	1	0	1	0	0	0	1	1	0	0	40520011	0	2	1	1	40520011	405200	0	1.33	-1.02	.41
4052001103	10	1	2	1	1	1	27.4	0	1	4	0	0	0	0	0	0	1	1	0	0	40520011	1	2	3	1	40520011	405200	0	.5	.74	.75
4052001104	10	1	2	0	0	1	31.8	0	1	6	0	0	0	0	0	0	1	1	1	0	40520011	0	3	3	1	40520011	405200	0	.91	.2	.76
4052001105	10	1	2	0	0	1	31.8	0	1	2	1	0	0	0	0	0	0	0	1	0	40520011	0	1	3	3	40520011	405200	0	1.03	.55	1.07
4052001106	10	1	2	1	1	1	24.7	0	1	5	1	0	0	0	0	0	1	1	0	0	40520011	0	3	3	1	40520011	405200	0	.3	1.7	1.07
4052001107	10	1	3	0	0	1	36	0	1	5	1	0	0	0	0	0	1	1	1	0	40520011	0	3	3	1	40520011	405200	0	.75	1.16	1.1
4052001108	10	1	1	0	0	1	35.5	0	1	2	1	1	1	1	0	0	1	1	0	0	40520011	0	1	1	1	40520011	405200	0	1.55	.46	1.36
4052001109	10	1	2	0	1	1	23.2	0	1	3	1	0	0	0	0	0	1	1	0	0	40520011	0	2	3	1	40520011	405200	0	-.93	4.84	1.98
4052001110	10	1	2	1	1	1		0	1	6	1	0	1	0	1	1	1	1	1	0	40520011	0	3	1	1	40520011	405200	0		-1.46	2.92
4052001111	10	1	2	0	0	1	31.9	0	1	3	0	0	1	0	0	0	1	1	1	0	40520011	0	2	1	1	40520011	405200	0	-1.08	-1.84	-1.74
4052001112	10	1	3	1	1	1	25.7	1	1	3	0	0	0	0	0	0	1	1	0	0	40520011	0	2	3	1	40520011	405200	0	-1.45	-1.46	-1.73
4052001113	10	1	3	0	1	1	24.3	0	1	4	0	0	0	0	0	0	1	0	0	0	40520011	0	2	3	1	40520011	405200	0	-.99	-.85	-1.13
4052001114	10	1	3	0	1	1	22.3	0	1	3	1	0	0	1	0	0	1	1	1	0	40520011	0	2	3	1	40520011	405200	0	-.29	-1.06	-.76
4052001115	10	1	2	1	1	1	30.7	0	1	6	0	0	0	0	0	0	1	1	1	0	40520011	0	3	3	1	40520011	405200	0	.07	-1.37	-.68
4052001116	10	1	3	0	1	1	27.4	0	1	3	1	0	0	0	0	0	1	1	1	0	40520011	0	2	3	1	40520011	405200	0	.31	-1.73	-.61
4052081101	10	0	3	1	0	1	32	0	1	6	1	0	0	0	0	0	0	0	0	0	40520011	0	3	2	3	40520011	405200	0	-.17	-.86	-.54
4052081102	10	0	3	1	1	1	28.6	0	1	5	0	0	0	1	1	0	0	0	0	0	40520011	0	3	2	2	40520011	405200	0	.07	-.77	-.29
4052081103	10	0	2	1	1	1	24.8	0	1	3	1	0	0	0	0	0	0	0	1	0	40520011	1	2	2	2	40520011	405200	0	.07	-.69	-.25
4052081104	10	0	1	0	1	1	26.6	0	1	6	1	0	0	0	0	0	0	1	0	0	40520011	1	3	2	2	40520011	405200	0	.11	-.4	-.09
4052081105	10	0	2	0	1	1	22.9	0	1	4	0	0	0	0	0	0	0	0	1	1	40520011	1	2	2	3	40520011	405200	0	.48	-.6	-.02
4052081106	10	0	2	1	1	1	24.6	0	1	4	1	0	0	1	1	0	0	0	1	0	40520011	0	2	2	3	40520011	405200	0	.9	-.67	.01
4052081107	10	0	3	1	1	1	28.1	0	1	4	1	0	0	0	0	0	0	0	0	0	40520011	0	2	2	2	40520011	405200	0	1.35	-.68	.66
4052081108	10	0	2	1	1	0	22.1	0	1	3	0	0	0	0	0	0	0	0	1	0	40520011	0	2	2	3	40520011	405200	0	1.75	-1.1	.77
4052081109	10	0	2	1	1	1	24.3	1	1	3	1	0	0	0	0	0	0	0	1	0	40520011	0	2	2	2	40520011	405200	0	2.24	-1.63	.92
4052081110	10	0	3	1	1	1	28.3	0	1	4	1	0	0	1	1	0	0	0	0	0	40520011	0	2	2	3	40520011	405200	0	3.65	-1.51	1.94
4052081111	10	0	1	1	0	1		0	1	2	1	0	0	1	0	0	0	0	0	0	40520011	0	1	2	3	40520011	405200	0	-3.26	-.06	-2.2
4052081112	10	0	2	1	0	1	25	0	1	3	1	0	0	0	1	0	0	0	0	0	40520011	1	2	2	2	40520011	405200	0	-1.82	-.48	-1.5
4052081113	10	0	3	1	1	1	27.6	0	1	2	0	0	0	1	1	0	0	0	0	0	40520011	0	1	2	3	40520011	405200	0	-1.38	-.91	-1.42
4052081114	10	0	1	0	1	1	30.6	1	1	4	0	0	0	0	0	0	0	0	1	1	40520011	1	2	2	3	40520011	405200	0	-.48	-.74	-.8
4052081115	10	0	3	0	1	1	25.3	0	1	5	1	0	0	0	0	0	0	0	1	0	40520011	0	3	2	3	40520011	405200	0	-.22	-.86	-.73
4052081116	10	0	1	1	1	1	22.4	0	1	3	1	0	0	1	1	0	0	0	1	0	40520011	0	2	2	3	40520011	405200	0	-.25	-.92	-.58
4052001201	10	1	3	1	1	1	23.3	0	1	3	0	0	0	0	0	0	0	1	1	0	40520012	0	2	3	3	40520012	405200	0	.03	-.95	-.4
4052001203	10	1	1	1	1	1	29.8	0	1	2	1	1	0	0	0	1	0	1	1	1	40520012	1	1	3	3	40520012	405200	0	-1.03	.9	-.38
4052001204	10	1	2	0	1	1	29.1	0	1	6	1	0	0	1	1	0	1	1	1	0	40520012	0	3	3	1	40520012	405200	0	.23	-1.05	-.37
4052001205	10	1	2	1	1	1	33.8	0	1	3	1	0	1	0	0	0	1	1	1	0	40520012	1	2	1	1	40520012	405200	0	.24	-1.02	-.26
4052001206	10	1	1	1	1	1	23.8	0	1	2	1	1	1	0	0	0	0	1	1	0	40520012	1	1	1	3	40520012	405200	0	.17	-.08	.05
4052001207	10	1	2	0	0	1	33.8	0	1	3	1	0	0	0	0	0	1	1	1	0	40520012	0	2	3	1	40520012	405200	0	-.42	.76	.15
4052001208	10	1	3	0	0	1	28.4	0	1	3	1	0	0	0	0	0	1	1	1	0	40520012	0	2	3	1	40520012	405200	0	.82	-.8	.18
4052001209	10	1	3	0	0	1	32.5	0	1	6	1	0	0	1	1	0	1	1	1	0	40520012	0	3	3	1	40520012	405200	0	.82	-.49	.35
4052001210	10	1	3	0	0	1	31	0	1	1	0	1	0	0	0	0	0	1	0	1	40520012	1	1	3	3	40520012	405200	0	.2	.56	.4
4052001211	10	1	2	1	0	1	29.6	0	1	1	1	1	0	0	0	0	0	1	0	1	40520012	1	1	3	3	40520012	405200	0	.46	.35	.54
4052001212	10	1	2	0	1	1	31.2	0	1	6	1	0	0	0	0	0	1	1	1	0	40520012	1	3	3	1	40520012	405200	0	-.43	-.5	-.59
4052001213	10	1	1	1	0	1	33.1	0	1	4	0	0	0	0	0	0	1	1	1	0	40520012	0	2	3	1	40520012	405200	0	-.59	.68	-.16
4052001214	10	1	2	1	1	1	26.1	1	1	4	1	0	0	1	1	1	1	1	0	0	40520012	0	2	3	1	40520012	405200	0	-.96	1.53	-.01
4052001215	10	1	1	1	0	1	36.1	0	1	3	1	0	0	0	0	0	1	1	1	0	40520012	0	2	3	1	40520012	405200	0	.82	-1.26	.06
4052001216	10	1	1	0	1	1	22.5	0	1	2	0	0	1	0	0	0	0	1	1	0	40520012	1	1	1	3	40520012	405200	0	.92	-1.13	.1
4052081201	10	0	3	1	1	1	30.6	1	1	5	1	0	0	0	0	0	0	1	0	0	40520012	0	3	2	2	40520012	405200	0	1.16	-1.69	.12
4052081202	10	0	3	0	1	0	40.1	0	1	5	0	0	0	0	0	0	0	0	1	0	40520012	0	3	2	3	40520012	405200	0	1.1	-.84	.28
4052081203	10	0	2	0	1	1	24.3	0	1	2	0	1	0	1	1	0	0	1	1	0	40520012	0	1	2	2	40520012	405200	0	.83	-.36	.41
4052081204	10	0	2	0	1	1		0	1	6	0	0	0	0	0	0	0	0	0	1	40520012	0	3	2	3	40520012	405200	0	1.25	-.81	.46
4052081205	10	0	2	1	0	1	32.8	0	1	4	1	0	0	1	1	0	0	0	1	0	40520012	0	2	3	3	40520012	405200	0	1.37	-.8	.7
4052081206	10	0	2	0	0	1	32.8	0	1	6	0	0	0	0	0	0	0	1	0	0	40520012	0	3	3	3	40520012	405200	0	1.82	-1.05	.82
4052081207	10	0	2	0	0	0	30	0	1	6	1	0	1	0	0	0	0	1	1	0	40520012	0	3	1	3	40520012	405200	0	-.4	2.25	.82
4052081208	10	0	3	1	1	1	23.6	1	1	2	1	1	1	0	0	0	0	0	1	0	40520012	1	1	1	2	40520012	405200	0	.24	1.92	1.02
4052081209	10	0	1	0	0	0	25.3	0	1	4	1	0	0	0	0	0	0	0	1	0	40520012	0	2	3	3	40520012	405200	0	1.02	.96	1.2
4052081210	10	0	1	0	0	0	27.6	0	1	3	1	1	1	1	1	0	0	0	1	0	40520012	0	2	1	3	40520012	405200	0	2.09	-.33	1.42
4052081211	10	0	2	0	1	0	30.4	0	1	1	0	1	1	0	0	0	0	0	1	0	40520012	0	1	1	3	40520012	405200	0	.98	2.16	1.79
4052081213	10	0	2	0	1	1	21.2	0	1	2	0	1	0	0	0	0	0	0	1	0	40520012	1	1	3	3	40520012	405200	0	-1.7	-1.29	-1.83
4052081214	10	0	2	0	1	1	29.8	0	1	5	1	0	0	0	1	0	0	0	1	0	40520012	0	3	3	3	40520012	405200	0	-1.17	-.94	-1.47
4052081215	10	0	3	1	1	1	26.7	0	1	1	1	1	0	0	0	0	0	1	1	0	40520012	0	1	3		40520012	405200	0	-1.24	-.95	-1.32
4052001301	10	1	2	0	1	1	24.8	0	1	6	0	0	0				1	1	1	0	40520013	0	3	2	1	40520013	405200	0	-.73	-.54	-.75
4052001302	10	1	2	1	1	1	28.3	0	1	4	1	0	0				1	1	1	0	40520013	0	2	2	1	40520013	405200	0	.15	-1.47	-.68
4052001303	10	1	1	0	1	1	26.1	1	1	4	1	0	0				1	1	1	0	40520013	0	2	2	1	40520013	405200	0	-.21	-.79	-.59
4052001304	10	1	2	0	0	1	40.4	0	1	4	0	0	0				1	1	1	0	40520013	0	2	2	1	40520013	405200	0	.27	-1.15	-.4
4052001305	10	1	2	1	1	1	21.8	0	1	6	0	0	0				1	1	1	1	40520013	1	3	2	1	40520013	405200	0	.26	-1.16	-.32
4052001306	10	1	2	0	1	1	23.2	0	1	4	1	0	0				1	1	0	0	40520013	0	2	2	1	40520013	405200	0	-.97	.64	-.27
4052001307	10	1	2	1	1	1	27.4	0	1	6	1	0	0				1	1	1	0	40520013	0	3	2	1	40520013	405200	0	-.09	-.3	-.25
4052001308	10	1	3	1	0	1	23.6	0	1	1	0	1	0				0	1	1	0	40520013	1	1	2	3	40520013	405200	0	.09	.17	.18
4052001309	10	1	2	1	1	1	22.8	1	1	2	1	0	0				1	1	1	1	40520013	1	1	2	1	40520013	405200	0	-.12	.95	.4
4052001310	10	1	2	1	1	1	21.8	0	1	1	0	1	0				0	1	0	0	40520013	0	1	2	2	40520013	405200	0	1.1	-.74	.46
4052001311	10	1	2	1	0	1	35.4	0	1	3	0	0	0				1	1	1	0	40520013	0	2	2	1	40520013	405200	0	.35	.79	.62
4052001312	10	1	1	0	1	1	24.3	0	1	5	1	0	0				1	1	1	0	40520013	1	3	2	1	40520013	405200	0	.18	1.29	.69
4052001313	10	1	1	1	1	1	28.1	0	1	6	0	0	0				1	1	1	0	40520013	1	3	2	1	40520013	405200	0	.01	1.81	.79
4052001314	10	1	1	0	1	1	30.9	0	1	3	1	0	0				1	1	1	0	40520013	0	2	2	1	40520013	405200	0	-.77	-1.81	-1.78
4052001315	10	1	3	1	0	1	23.6	0	1	1	0	1	0				1	1	1	0	40520013	1	1	2	1	40520013	405200	0	-.39	-1.36	-1.01
4052001316	10	1	2	0	1	1	29.2	0	1	4	1	0	0				1	1	1	0	40520013	0	2	2	1	40520013	405200	0	-.04	-1.12	-1
4052081301	10	0	1	0	1	0	24.5	0	1	3	1	0	0	0	0	0	0	1	1	0	40520013	0	2	3	2	40520013	405200	0	-.94	-.4	-.85
4052081302	10	0	2	0	0	1	25.3	0	1	3	1	1	1	0	0	0	0	1	1	0	40520013	0	2	1	3	40520013	405200	0	-1.04	-.08	-.8
4052081303	10	0	3	0	0	0	35.6	0	1	2	1	0	1	1	1	0	0	0	1	1	40520013	0	1	1	2	40520013	405200	0	.45	-1.65	-.41
4052081304	10	0	2	0	0	1	31.2	0	1	4	1	0	0	0	0	1	0	1	1	0	40520013	0	2	3	3	40520013	405200	0	.99	-2.29	-.32
4052081305	10	0	2	0	1	0	27.8	0	1	6	1	0	1	0	0	0	0	0	1	0	40520013	0	3	1	3	40520013	405200	0	-.77	.53	-.17
4052081306	10	0	1	1	0	1	34.4	0	1	3	0	0	1	0	0	0	0	0	1	0	40520013	0	2	1	3	40520013	405200	0	0	-.11	-.11
4052081307	10	0	2	0	1	1	23.8	0	1	2	0	0	1	0	0	0	0	0	1	0	40520013	0	1	1	3	40520013	405200	0	.17	-.29	.01
4052081308	10	0	1	1	0	0	27.8	0	1	5	1	0	1	0	0	0	0	0	1	0	40520013	0	3	1	3	40520013	405200	0	-2.59	2.97	.07
4052081309	10	0	2	0	1	1	25.7	0	1	4	1	0	0	1	0	0	0	0	1	0	40520013	0	2	3	3	40520013	405200	0	1.44	-1.82	.24
4052081310	10	0	3	0	1	1	24.3	0	1	4	0	0	0	1	0	0	0	0	1	0	40520013	0	2	3	3	40520013	405200	0	1.09	-1.09	.32
4052081311	10	0	1	1	0	1	33.7	1	1	4	0	0	0	0	0	0	0	0	1	0	40520013	0	2	3	3	40520013	405200	0	1.42	-1.22	.47
4052081312	10	0	2	1	0	0	27.6	0	1	4	1	0	0				0	0	1	0	40520013	0	2	3	3	40520013	405200	0	1.3	-.44	.69
4052081313	10	0	3	0	1	0	26.9	1	1	5	0	0	0	0	0	0	0	1	1	0	40520013	1	3	3	3	40520013	405200	0	1.36	.64	1.34
4052081314	10	0	3	0	1	1	26.8	0	1	4	1	0	0	1	1	0	0	1	1	0	40520013	0	2	3	3	40520013	405200	0	-.66	-1.7	-1.34
4052081315	10	0	3	1	0	1	27.8	0	1	5	0	0	0	0	0	0	0	1	0	0	40520013	1	3	3	3	40520013	405200	0	-1.4	-.3	-1.26
4052001401	10	1	1	1	1	1	30.1	0	1	4	0	0	0				1	1	0	0	40520014	0	2	2	1	40520014	405200	0	-1.11	-.59	-1.08
4052001402	10	1	1	1	1	1	25.3	0	1	2	0	1	0				0	1	0	0	40520014	1	1	2	3	40520014	405200	0	-.55	-.9	-1
4052001403	10	1	1	0	1	1	22.8	0	1	4	1	0	0				1	1	1	0	40520014	0	2	2	1	40520014	405200	0	.55	-2.6	-.93
4052001404	10	1	2	0	1	1	31.3	1	1	4	1	0	0				1	1	1	0	40520014	1	2	2	1	40520014	405200	0	-.36	-.78	-.65
4052001405	10	1	1	1	1	1	25.2	0	1	5	1	0	0				1	1	0	0	40520014	0	3	2	1	40520014	405200	0	-1.28	1.02	-.52
4052001406	10	1	3	0	0	1	35.8	0	1	4	1	0	0				1	0	1	0	40520014	0	2	2	1	40520014	405200	0	-.17	-.47	-.33
4052001407	10	1	1	0	1	1	23.3	0	1	4	1	0	0				1	0	1	0	40520014	0	2	2	1	40520014	405200	0	.25	-.72	-.19
4052001408	10	1	1	1	1	1	23.6	1	1	4	1	0	0				1	1	0	0	40520014	0	2	2	1	40520014	405200	0	-.95	1.28	-.1
4052001409	10	1	1	0	1	1	24.3	0	1	4	1	0	0				1	1	1	0	40520014	1	2	2	1	40520014	405200	0	-.36	.64	.03
4052001410	10	1	1	0	1	1	31.4	0	1	4	0	0	0				1	1	0	0	40520014	0	2	2	1	40520014	405200	0	-.51	1.11	.24
4052001411	10	1	3	1	1	1	23.8	0	1	3	0	0	0				1	1	1	0	40520014	0	2	2	1	40520014	405200	0	.03	.55	.27
4052001412	10	1	1	0	0	1	29.5	0	1	3	0	0	0				1	1	0	0	40520014	0	2	2	1	40520014	405200	0	.74	-.43	.35
4052001413	10	1	3	0	1	1	23.8	0	1	1	1	0	0				0	1	1	0	40520014	1	1	2	3	40520014	405200	0	3.33	1.48	3.37
4052001414	10	1	2	0	1	1	25.3	0	1	5	1	0	0				1	1	1	0	40520014	1	3	2	1	40520014	405200	0	4.69	-.36	3.43
4052001415	10	1	1	0	1	1	21.6	0	1	3	0	0	0				1	1	0	0	40520014	1	2	2	1	40520014	405200	0	-.59	-2.31	-1.68
4052001416	10	1	2	0	1	1	23	0	1	3	0	0	0				1	1	1	0	40520014	1	2	2	1	40520014	405200	0	-.75	-1.5	-1.3
4052081401	10	0	1	1	1	1	22.1	1	1	2	1	1	1	0	0	0	0	1	0	0	40520014	1	1	1	3	40520014	405200	0	-.06	-2.17	-1.04
4052081402	10	0	2	1	0	1	29.9	0	1	2	0	1	1	0	0	0	0	0	1	0	40520014	0	1	1	3	40520014	405200	0	-.17	-1.22	-.86
4052081403	10	0	1	0	1	1	23	0	1	5	0	0	0	0	1	0	0	0	1	0	40520014	1	3	3	3	40520014	405200	0	-1.09	-.08	-.77
4052081404	10	0	3	0	0	0	30.3	0	1	3	1	1	1	0	0	0	0	0	1	0	40520014	0	2	1	3	40520014	405200	0	1.03	-2.51	-.68
4052081405	10	0	2	0	1	1	25.5	0	1	3	1	1	1	1	1	0	0	0	1	0	40520014	1	2	1	3	40520014	405200	0	-.56	-.3	-.52
4052081406	10	0	3	0	1	1	26.9	0	1	4	0	0	0	1	0	0	0	1	1	0	40520014	1	2	3	3	40520014	405200	0	.59	-1.9	-.43
4052081407	10	0	2	0	1	0	27.8	0	1	6	1	0	1	0	0	0	0	0	1	0	40520014	0	3	1	3	40520014	405200	0	-.61	.1	-.33
4052081408	10	0	1	0	1	1	28.8	0	1	3	1	0	1	1	1	0	0	1	0	0	40520014	0	2	1	3	40520014	405200	0	.03	-.5	-.24
4052081409	10	0	3	1	1	0	25.2	0	1	2	0	0	1	0	1	0	0	0	1	0	40520014	1	1	1	3	40520014	405200	0	.88	-.91	0
4052081410	10	0	3	0	0	0	25.8	0	1	3	1	1	0	0	0	0	0	0	1	0	40520014	0	2	3	3	40520014	405200	0	.01	.12	.05
4052081411	10	0	3	1	1	1	27.7	0	1	6	1	0	1	0	0	0	0	1	1	1	40520014	1	3	1	3	40520014	405200	0	.76	-.83	.14
4052081412	10	0	2	1	1	0	27	0	1	6	1	0	0	0	0	0	0	0	0	0	40520014	0	3	3	3	40520014	405200	0	-.13	.6	.17
4052081413	10	0	2	0	1	1	21	0	1	2	0	0	0	0	1	0	0	0	1	0	40520014	0	1	3	3	40520014	405200	0	1.26	-.84	.59
4052002101	10	1	1	0	1	1	20.3	0	1	2	1	1	0	0	0	0	0	1	1	0	40520021	0	1	2	3	40520021	405200	0	2.11	-.86	.98
4052002101	10	0	3	0	1	1	24.3	1	1	2	1	1	0	1	0	0	0	0	1	0	40520021	0	1	3	3	40520021	405200	0	-.66	-1.79	-1.48
[truncated: 19,512 more rows]
